# Supplementary material for: An iridium-catalyzed intramolecular allylic substitution reaction: efficient enantioselective synthesis of 1,3,4-oxadiazine, oxazoline and 1,3-oxazine derivatives
Source: Royal Society of Chemistry journal article supplement (doi:10.1039/d5qo01683e), 2026-01-01
Supplement: d5qo01683e1.pdf [file d5qo01683e1.pdf]

*Supporting Information*

**Iridium-catalyzed intramolecular allylic substitution reaction:  
efficiently enantioselective synthesis of 1,3,4-oxadiazine,  
oxazolines and 1,3-oxazine derivatives**

Xiyu Li, Fang Hu, Yinsheng Qi, Shuncheng Wang, Xin-Ping Hui\*

*State Key Laboratory of Natural Product Chemistry, College of Chemistry and Chemical  
Engineering, Lanzhou University, Lanzhou 730000, P. R. China*

\*Corresponding author: Prof. Xin-Ping Hui

E-mail: huixp@lzu.edu.cn

**Contents**

|                                                                                            |    |
|--------------------------------------------------------------------------------------------|----|
| 1. General information.....                                                                | 2  |
| 2. General procedure for synthesis of substrates.....                                      | 2  |
| 3. General procedure for enantioselective synthesis of <b>2a–2x</b> and <b>4a–4e</b> ..... | 4  |
| 4. Synthetic transformations of compound <b>2a</b> .....                                   | 15 |
| 5. Scale-up synthesis of compound <b>2a</b> .....                                          | 17 |
| 6. References.....                                                                         | 18 |
| 7. NMR spectra of compounds <b>2a–2x</b> , <b>4a–4e</b> and <b>5–7</b> .....               | 19 |
| 8. HPLC spectra of compounds <b>2a–2x</b> , <b>4a–4e</b> and <b>5–7</b> .....              | 53 |

## 1. General information

$^1\text{H}$  NMR,  $^{13}\text{C}$  NMR and  $^{19}\text{F}$  NMR spectra were recorded on a Bruker AVANCE III 400 spectrometer using tetramethylsilane as internal reference, and chemical shifts ( $\delta$ ) and coupling constants ( $J$ ) were expressed in ppm and Hz, respectively. Optical rotation was measured by the Perkin Elmer 341 polarimeter. The HRMS analysis was obtained on a Thermo Scientific mass spectrometer (ESI) with an Orbitrap analyzer. The ee value determination was carried out using HPLC with chiral Chirapak column on Agilent 1260 and SHIMADZU LC-20AD with a UV detector. The X-ray data was detected by Agilent SuperNOVA X-ray single crystal diffractometer. Melting points were taken on an XT-4 melting point apparatus and were uncorrected. Dichloromethane was freshly distilled from phosphorous pentoxide. Toluene and THF were freshly distilled from a deep-blue solution of sodium-benzophenone under nitrogen. Acetonitrile was dried by calcium hydride and freshly distilled.  $[\text{Ir}(\text{COD})\text{Cl}]_2$  and *n*-propylamine were purchased from commercial suppliers and used directly. All syntheses and manipulations were carried out under a dry argon atmosphere. Flash column chromatography was carried out utilizing 200–300 mesh silica gel.

**S1a–S1x** and **S4e** were prepared according to literature.<sup>[1-2]</sup>

## 2. General procedure for synthesis of substrates

### 2.1 General procedure for synthesis of substrates 1a–1x

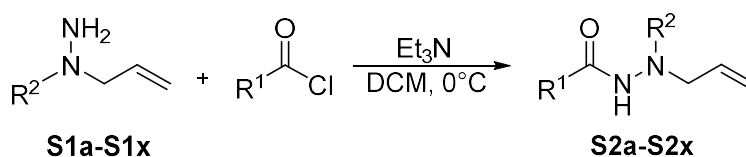

To a solution of 1-allyl-1-aryl hydrazine (10 mmol) in  $\text{CH}_2\text{Cl}_2$  (30 mL) was added  $\text{NEt}_3$  (30 mmol, 4.2 mL, 3.0 equiv.) and benzoyl chloride (15 mmol, 1.5 equiv.) at  $0^\circ\text{C}$ . The solution was stirred at  $0^\circ\text{C}$  for 2 h (monitored by TLC). The reaction was quenched with water, extracted with  $\text{CH}_2\text{Cl}_2$  (20 mL $\times$ 3). The organic layer was dried over  $\text{MgSO}_4$ , filtered, and concentrated under reduced pressure. The residue was purified by flash chromatography on silica gel (petroleum ether/ethyl acetate = 15/1) to afford products **S2** in 42–62% yields.

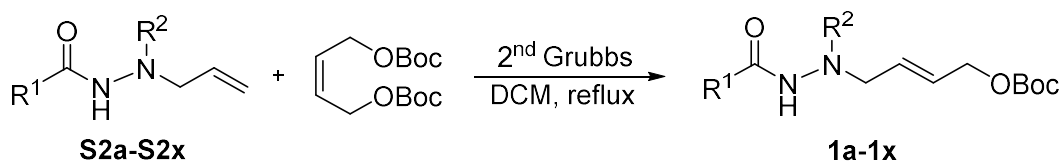

Under argon atmosphere, a solution of 2<sup>nd</sup> Grubbs catalyst (0.06 mmol, 51 mg, 0.03 equiv.) in dry  $\text{CH}_2\text{Cl}_2$  (2 mL) was added to a solution of **S2** (2 mmol) and (Z)-but-2-ene-1,4-diyl di-*tert*-butyl bis(carbonate) (2.4 mmol, 692 mg, 1.2 equiv.) in dry  $\text{CH}_2\text{Cl}_2$  (10 mL) at room temperature. The solution was refluxed overnight and the solvent was removed under reduced pressure. The residue was purified by flash chromatography on silica gel (petroleum ether/ethyl acetate = 10/1) to afford compounds **1**.

## 2.2 General procedure for synthesis of substrates 3a–3b

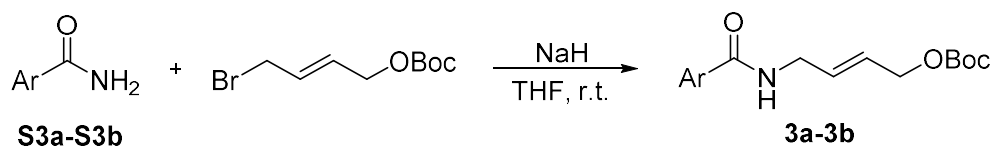

To a solution of argoncarboxamide (5.5 mmol, 1.1 equiv.) in THF (40 mL) was added NaH (10 mmol, 2.0 equiv.) at 0 °C, the reaction mixture was stirred for 1 h. Then, 4-bromobut-2-en-1-yl *tert*-butyl carbonate (5 mmol, 1.26 g, 1.0 equiv.) was added. The solution was stirred at rt for 12 h (monitored by TLC) and was quenched with water, extracted with ethyl acetate (20 mL×3). The combined organic phase was dried over MgSO<sub>4</sub>, filtered, and concentrated under reduced pressure. The residue was purified by flash chromatography on silica gel (petroleum ether/ethyl acetate = 10/1) to afford compounds **3**.

## 2.3 General procedure for synthesis of substrates 3c–3d

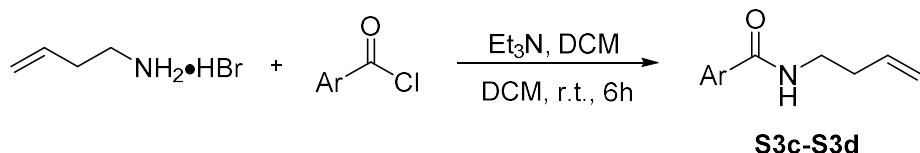

To a solution of 3-buten-1-amine hydrobromide (5 mmol, 0.76 g) in CH<sub>2</sub>Cl<sub>2</sub> (40 mL) was added NEt<sub>3</sub> (15 mmol, 2.09 mL, 3.0 equiv.) and argoncarbonyl chloride (5.5 mmol, 1.1 equiv.) at 0 °C. The solution was stirred at room temperature for 6 h (monitored by TLC). The reaction was quenched with water, extracted with CH<sub>2</sub>Cl<sub>2</sub> (20 mL×3). The combined organic phase was dried over MgSO<sub>4</sub>, filtered, and concentrated under reduced pressure. The residue was purified by flash chromatography on silica gel (petroleum ether/ethyl acetate = 10/1) to afford products **S3c–S3d**.

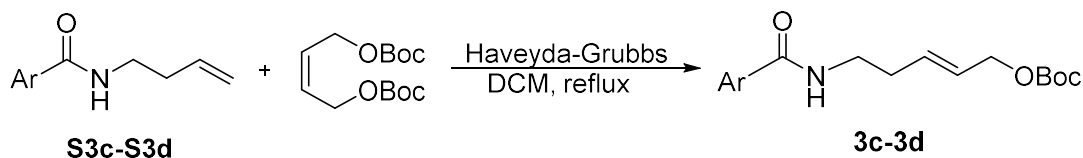

Under an argon atmosphere, a solution of Haveyda-Grubbs catalyst (0.1 mmol, 31 mg, 0.05 equiv.) in dry CH<sub>2</sub>Cl<sub>2</sub> (2 mL) was added to a solution of **S3** (2 mmol) and (*Z*)-but-2-ene-1,4-diyl di-*tert*-butyl bis(carbonate) (2.4 mmol, 692 mg, 1.2 equiv.) in dry CH<sub>2</sub>Cl<sub>2</sub> (10 mL) at room temperature. The solution was refluxed overnight and the solvent was removed under reduced pressure. The residue was purified by flash chromatography on silica gel (petroleum ether/ethyl acetate = 10/1) to afford compounds **3c–3d**.

## 2.4 General procedure for synthesis of substrate 3e

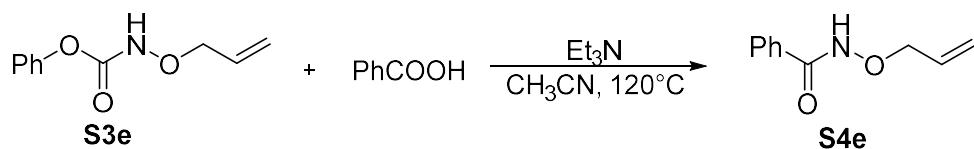

Compound **S4e** was synthesized according to literature method.<sup>[2]</sup>

A solution of benzoic acid (0.366 g, 3 mmol), **S3e** (1.737g, 9 mmol), NEt<sub>3</sub> (13.9  $\mu$ L, 1 mmol) in acetonitrile (20 mL) was refluxed for 22 h at 120°C. The crude mixture was concentrated under reduced pressure and the residue was purified by flash chromatography on silica gel (petroleum ether/ethyl acetate = 5/1) to obtain compound **S4e**.

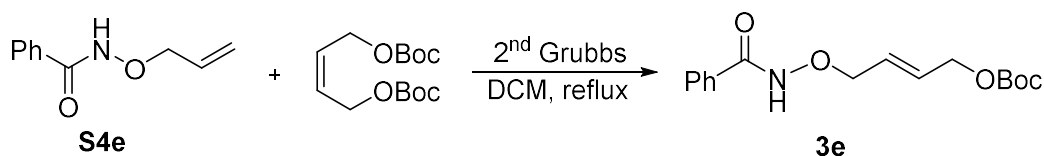

Under an argon atmosphere, a solution of 2<sup>nd</sup> Grubbs catalyst (0.06 mmol, 51 mg, 0.03 equiv.) in dry CH<sub>2</sub>Cl<sub>2</sub> (2 mL) was added to a solution of **S4e** (2 mmol, 354 mg) and (*Z*)-but-2-ene-1,4-diyl di-*tert*-butyl bis(carbonate) (2.4 mmol, 692 mg, 1.2 equiv.) in dry CH<sub>2</sub>Cl<sub>2</sub> (10 mL) at room temperature. The solution was refluxed overnight and the solvent was removed under reduced pressure. The residue was purified by flash chromatography on silica gel (petroleum ether/ethyl acetate = 10/1) to afford compound **3e**.

## 2.5 General procedure for synthesis of racemic **2a–2x** and **4a–4e**

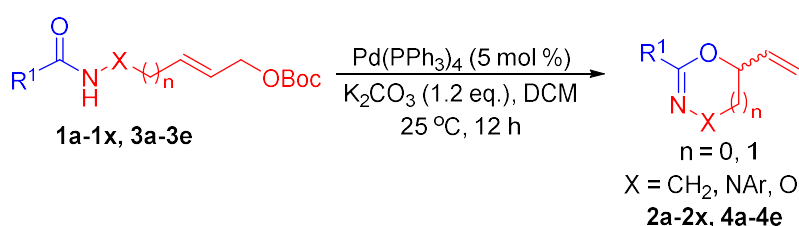

To a 25 mL Schlenk tube equipped with a magnetic stir bar was added Pd(PPh<sub>3</sub>)<sub>4</sub> (0.005 mmol, 5.8 mg, 5 mol %), K<sub>2</sub>CO<sub>3</sub> (0.12 mmol, 16.6 mg, 1.2 equiv.). The flask was sealed, evacuated, and backfilled with argon three times using standard Schlenk techniques. Subsequently, a solution of **1** (0.1 mmol) in DCM (2 mL) were added. The resulting solution was stirred at room temperature for 12 h. Upon completion of the reaction (monitored by TLC), the reaction mixture was passed through a short pad of celite and washed with DCM (5 mL×3). The solvent was removed under reduced pressure and the residue was purified by flash column chromatography on silica gel to afford the racemic products **2** or **4**.

## 3. General procedure for enantioselective synthesis of **2a–2x** and **4a–4e**

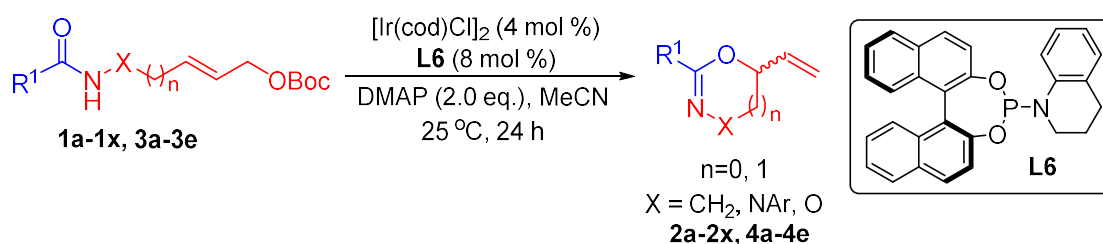



To a 25 mL Schlenk tube equipped with a magnetic stir bar was added [Ir(COD)Cl]<sub>2</sub> (0.004 mmol, 2.7 mg, 4 mol %), phosphoramidite ligand **L6** (0.008 mmol, 3.6 mg, 8 mol %). The flask was sealed, evacuated, and backfilled with argon three times using standard Schlenk techniques. THF (0.5 mL) and *n*-propylamine (0.5 mL) was added at 25 °C and the reaction mixture was warmed to 50 °C for 0.5 h. The solvent was removed under reduced pressure to give a pale-yellow solid and DMAP (0.2 mmol, 24.4 mg, 2 equiv.), a solution of substrates **1** or **3** (0.1 mmol) in MeCN (2 mL) were added. The resulting solution was stirred for 24 h at 25 °C. Upon completion of the reaction (monitored by TLC), the reaction mixture was passed through a short pad of celite and washed with ethyl acetate (5 mL×3). The solvent was removed under reduced pressure and the residue was purified by flash column chromatography on silica gel to afford the products **2** or **4**.

**(*R*)-2,4-diphenyl-6-vinyl-5,6-dihydro-4*H*-1,3,4-oxadiazine (2a)**

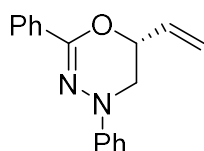

yellow oil, 23.2 mg, 88% yield, 94% ee, [ $\alpha$ ]<sub>D</sub><sup>24</sup> –36.0 (c 0.5, CH<sub>2</sub>Cl<sub>2</sub>). <sup>1</sup>H NMR (400 MHz, CDCl<sub>3</sub>)  $\delta$  7.94 (dd, *J* = 6.0, 2.0 Hz, 2H), 7.40 – 7.39 (m, 1H), 7.38 – 7.30 (m, 3H), 7.29 – 7.25 (m, 3H), 6.92 – 6.88 (m, 1H), 6.06 – 5.97 (m, 1H), 5.55 (d, *J* = 17.2 Hz, 1H), 5.40 (d, *J* = 10.4 Hz, 1H), 4.95 – 4.91 (m, 1H), 3.95 (dd, *J* = 12.0, 3.2 Hz, 1H), 3.37 (q, *J* = 7.2 Hz, 1H). <sup>13</sup>C NMR (100 MHz, CDCl<sub>3</sub>)  $\delta$  147.10, 143.24, 133.98, 132.57, 129.12, 129.10, 128.15, 125.40, 119.96, 118.58, 113.46, 73.02, 46.69. HRMS (ESI): Exact Mass Calcd. for C<sub>17</sub>H<sub>17</sub>N<sub>2</sub>O (M+H): 265.1335, Found: 265.1338. HPLC (OD–H, *n*-hexane/*i*-PrOH = 99/1, flow rate = 1.0 mL/min,  $\lambda$  = 254 nm) *t*<sub>R</sub> = 7.245 min (minor), 7.743 min (major).

**(*R*)-2-(4-fluorophenyl)-4-phenyl-6-vinyl-5,6-dihydro-4*H*-1,3,4-oxadiazine (2b)**

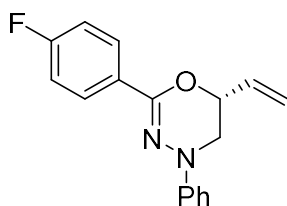

yellow solid, mp 50.4 – 54.6 °C, 20.3 mg, 72% yield, 92% ee, [ $\alpha$ ]<sub>D</sub><sup>23</sup> –58.0 (c 0.5, CH<sub>2</sub>Cl<sub>2</sub>). <sup>1</sup>H NMR (400 MHz, CDCl<sub>3</sub>)  $\delta$  7.94 – 7.90 (m, 2H), 7.35 – 7.31 (m, 2H), 7.27 – 7.25 (m, 2H), 7.06 (t, *J* = 7.2 Hz, 2H), 6.90 (t, *J* = 7.2 Hz, 1H), 6.05 – 5.97 (m, 1H), 5.35 (d, *J* = 17.2 Hz, 1H), 5.41 (d, *J* = 10.8 Hz, 1H), 4.94 – 4.93 (m, 1H), 3.94 (dd, *J* = 11.6, 2.8 Hz, 1H), 3.34 (q, *J* = 7.2 Hz, 1H). <sup>13</sup>C NMR (100 MHz, CDCl<sub>3</sub>)  $\delta$  163.49 (d, *J* = 247.0 Hz), 147.04, 142.61, 133.87, 129.14, 128.73 (d, *J* = 3.0 Hz), 127.32 (d, *J* = 8.2 Hz), 120.05, 118.72, 115.14 (d, *J* = 21.8 Hz), 113.46, 73.19, 46.65. <sup>19</sup>F NMR (376 MHz, CDCl<sub>3</sub>)  $\delta$  –112.25. HRMS (ESI): Exact Mass Calcd. for C<sub>17</sub>H<sub>16</sub>FN<sub>2</sub>O (M+H): 283.1241, Found: 283.1233. HPLC (OD–H, *n*-hexane/*i*-PrOH = 99/1, flow rate = 1.0 mL/min,  $\lambda$  = 254 nm) *t*<sub>R</sub> = 8.483 min (minor), 9.352 min (major).

128.74

**(R)-2-(4-chlorophenyl)-4-phenyl-6-vinyl-5,6-dihydro-4H-1,3,4-oxadiazine (2c)**

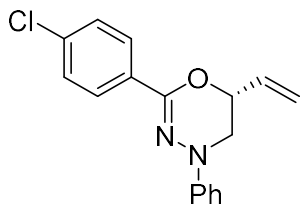

yellow solid, mp 64.2 – 66.4 °C, 22.4 mg, 75% yield, 93% ee,  $[\alpha]_D^{23}$  –31.0 (c 1.0, CH<sub>2</sub>Cl<sub>2</sub>). <sup>1</sup>H NMR (400 MHz, CDCl<sub>3</sub>)  $\delta$  7.87 – 7.84 (m, 2H), 7.34 – 7.30 (m, 4H), 7.26 – 7.24 (m, 2H), 6.91 (t,  $J$  = 7.2 Hz, 1H), 6.04 – 5.95 (m, 1H), 5.52 (d,  $J$  = 17.2, 1H), 5.40 (d,  $J$  = 10.4 Hz, 1H), 4.93 – 4.89 (m, 1H), 3.93 (dd,  $J$  = 11.6, 2.8 Hz, 1H), 3.35 (q,  $J$  = 7.2 Hz, 1H). <sup>13</sup>C NMR (100 MHz, CDCl<sub>3</sub>)  $\delta$  146.90, 142.40, 134.93, 133.80, 131.07, 129.15, 128.36, 126.66, 120.17, 118.77, 113.48, 73.07, 46.62. HRMS (ESI): Exact Mass Calcd. for C<sub>17</sub>H<sub>16</sub>ClN<sub>2</sub>O (M+H): 299.0946, Found: 299.0948. HPLC (OD–H, *n*-hexane/*i*-PrOH = 99/1, flow rate = 1.0 mL/min,  $\lambda$  = 254 nm)  $t_R$  = 9.499 min (minor), 11.099 min (major).

**(R)-2-(4-bromophenyl)-4-phenyl-6-vinyl-5,6-dihydro-4H-1,3,4-oxadiazine (2d)**

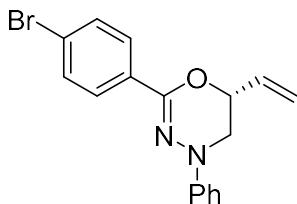

yellow solid, mp 82.8 – 84.6 °C, 26.8 mg, 78% yield, 94% ee,  $[\alpha]_D^{23}$  –34.0 (c 1.0, CH<sub>2</sub>Cl<sub>2</sub>). <sup>1</sup>H NMR (400 MHz, CDCl<sub>3</sub>)  $\delta$  7.81 – 7.79 (m, 2H), 7.50 – 7.48 (m, 2H), 7.35 – 7.31 (m, 2H), 7.27 – 7.25 (m, 2H), 6.92 (t,  $J$  = 7.2 Hz, 1H), 6.05 – 5.96 (m, 1H), 5.53 (d,  $J$  = 17.2 Hz, 1H), 5.41 (d,  $J$  = 10.4 Hz, 1H), 4.93 – 4.92 (m, 1H), 3.95 (dd,  $J$  = 12.0, 2.8 Hz, 1H), 3.37 (q,  $J$  = 7.2 Hz, 1H). <sup>13</sup>C NMR (100 MHz, CDCl<sub>3</sub>)  $\delta$  146.87, 142.42, 133.77, 131.53, 131.29, 129.14, 126.91, 123.24, 120.18, 118.77, 113.48, 73.04, 46.60. HRMS (ESI): Exact Mass Calcd. for C<sub>17</sub>H<sub>16</sub>BrN<sub>2</sub>O (M+H): 343.0441, Found: 343.0434. HPLC (OD–H, *n*-hexane/*i*-PrOH = 99/1, flow rate = 1.0 mL/min,  $\lambda$  = 254 nm)  $t_R$  = 10.469 min (minor), 13.204 min (major).

**(R)-4-phenyl-2-(4-(trifluoromethyl) phenyl)-6-vinyl-5,6-dihydro-4H-1,3,4-oxadiazine (2e)**

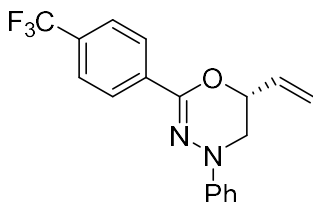

yellow oil, 21.6 mg, 65% yield, 90% ee,  $[\alpha]_D^{23}$  –12.0 (c 1.0, CH<sub>2</sub>Cl<sub>2</sub>). <sup>1</sup>H NMR (400 MHz, CDCl<sub>3</sub>)  $\delta$  8.03 (d,  $J$  = 8.0 Hz, 2H), 7.62 (d,  $J$  = 8.0 Hz, 2H), 7.36 – 7.32 (m, 2H), 7.29 – 7.26 (m, 2H), 6.94 (t,  $J$  = 7.2 Hz, 1H), 6.06 – 5.97 (m, 1H), 5.54 (d,  $J$  = 17.2 Hz, 1H), 5.42 (d,  $J$  = 10.4 Hz, 1H), 4.96 – 4.92 (m, 1H), 3.97 (dd,  $J$  = 11.6, 2.8 Hz, 1H), 3.41 (q,  $J$  = 7.2 Hz, 1H). <sup>13</sup>C NMR (100 MHz, CDCl<sub>3</sub>)  $\delta$

146.70, 141.90, 135.92, 133.66, 130.76, 130.43, 129.20, 125.49, 125.12 (q,  $J = 3.9$  Hz), 120.44, 118.93, 113.57, 73.01, 46.62.  $^{19}\text{F}$  NMR (376 MHz,  $\text{CDCl}_3$ )  $\delta$  -62.54. HRMS (ESI): Exact Mass Calcd. for  $\text{C}_{18}\text{H}_{16}\text{F}_3\text{N}_2\text{O}$  ( $\text{M}+\text{H}$ ): 333.1209, Found: 333.1209. HPLC (OD-H,  $n$ -hexane/ $i$ -PrOH = 99/1, flow rate = 1.0 mL/min,  $\lambda = 254$  nm)  $t_{\text{R}} = 10.453$  min (minor), 12.019 min (major).

**(*R*)-4-phenyl-2-(*p*-tolyl)-6-vinyl-5,6-dihydro-4*H*-1,3,4-oxadiazine (2f)**

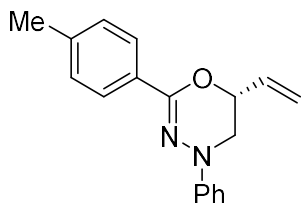

yellow solid, mp 72.1–74.4°C, 23.4 mg, 84% yield, 93% ee,  $[\alpha]_{\text{D}}^{24} -30.0$  (c 0.5,  $\text{CH}_2\text{Cl}_2$ ).  $^1\text{H}$  NMR (400 MHz,  $\text{CDCl}_3$ )  $\delta$  7.83 (d,  $J = 8.16$  Hz, 2 H), 7.34 – 7.30 (m, 2 H), 7.28 – 7.24 (m, 2 H), 7.18 (d,  $J = 8.1$  Hz, 2 H), 6.90 – 6.87 (m, 1 H), 6.04 – 5.96 (m, 1 H), 5.53 (d,  $J = 17.2$  Hz, 1 H), 5.38 (d,  $J = 10.6$  Hz, 1 H), 4.93 – 4.90 (m, 1H), 3.92 (dd,  $J = 11.7$ , 3 Hz, 1 H), 3.37– 3.32 (q,  $J = 7.24$  Hz, 1 H), 2.37 (s, 3 H).  $^{13}\text{C}$  NMR (100 MHz,  $\text{CDCl}_3$ )  $\delta$  147.18, 143.46, 139.11, 134.05, 129.80, 129.08, 128.86, 125.36, 119.81, 118.49, 113.41, 73.00, 46.68, 21.42. HRMS (ESI): Exact Mass Calcd. for  $\text{C}_{18}\text{H}_{19}\text{N}_2\text{O}$  ( $\text{M}+\text{H}$ ): 279.1492, Found: 279.1483. HPLC (OD-H,  $n$ -hexane/ $i$ -PrOH = 99/1, flow rate = 1.0 mL/min,  $\lambda = 254$  nm)  $t_{\text{R}} = 8.028$  min (minor), 9.590 min (major).

**(*R*)-2-(4-ethylphenyl)-4-phenyl-6-vinyl-5,6-dihydro-4*H*-1,3,4-oxadiazine (2g)**

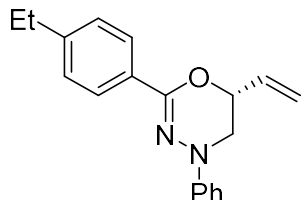

yellow oil, 21.9 mg, 75% yield, 73% ee,  $[\alpha]_{\text{D}}^{24} -10.0$  (c 0.5,  $\text{CH}_2\text{Cl}_2$ ).  $^1\text{H}$  NMR (400 MHz,  $\text{CDCl}_3$ )  $\delta$  7.85 (d,  $J = 8.0$  Hz, 2H), 7.34 – 7.28 (m, 4H), 7.23 – 7.19 (m, 2H), 6.90 – 6.87 (m, 1H), 6.04 – 5.96 (m, 1H), 5.55 (d,  $J = 17.2$  Hz, 1H), 5.38 (d,  $J = 10.8$  Hz, 1H), 4.93 – 4.89 (m, 1H), 3.92 (dd,  $J = 11.6$ , 2.8 Hz, 1H), 3.33 (q,  $J = 7.2$  Hz, 1H), 2.67 (q,  $J = 7.6$  Hz, 2H), 1.24 (t,  $J = 7.6$  Hz, 3H).  $^{13}\text{C}$  NMR (100 MHz,  $\text{CDCl}_3$ )  $\delta$  147.19, 145.50, 143.48, 134.05, 130.04, 129.08, 127.68, 125.47, 119.80, 118.46, 113.41, 72.99, 46.69, 28.79, 15.56. HRMS (ESI): Exact Mass Calcd. for  $\text{C}_{19}\text{H}_{21}\text{N}_2\text{O}$  ( $\text{M}+\text{H}$ ): 293.1648, Found: 293.1653. HPLC (OD-H,  $n$ -hexane/ $i$ -PrOH = 99/1, flow rate = 1.0 mL/min,  $\lambda = 254$  nm)  $t_{\text{R}} = 7.736$  min (minor), 8.872 min (major).

**(*R*)-2-(4-methoxyphenyl)-4-phenyl-6-vinyl-5,6-dihydro-4*H*-1,3,4-oxadiazine (2h)**

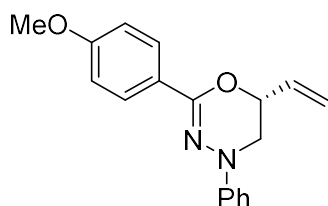

yellow solid, mp 59.6 – 63.5 °C, 19.1 mg, 65% yield, 85% ee,  $[\alpha]_{\text{D}}^{24}$  –20.0 (c 0.5, CH<sub>2</sub>Cl<sub>2</sub>). <sup>1</sup>H NMR (400 MHz, CDCl<sub>3</sub>)  $\delta$  7.89 – 7.86 (m, 2H), 7.33 – 7.23 (m, 4H), 6.91 – 6.86 (m, 3H), 6.04 – 5.95 (m, 1H), 5.52 (d,  $J$  = 17.6 Hz, 1H), 5.38 (d,  $J$  = 10.4 Hz, 1H), 4.92 – 4.88 (m, 1H), 3.91 (dd,  $J$  = 11.6, 2.8 Hz, 1H), 3.82 (s, 3H), 3.32 (q,  $J$  = 7.2 Hz, 1H). <sup>13</sup>C NMR (100 MHz, CDCl<sub>3</sub>)  $\delta$  160.51, 147.25, 143.39, 134.07, 129.07, 126.92, 125.23, 119.71, 118.46, 113.53, 113.37, 73.11, 55.34, 46.69. HRMS (ESI): Exact Mass Calcd. for C<sub>18</sub>H<sub>19</sub>N<sub>2</sub>O<sub>2</sub> (M+H): 295.1441, Found: 295.1439. HPLC (OD–H, *n*-hexane/*i*-PrOH = 99/1, flow rate = 1.0 mL/min,  $\lambda$  = 254 nm)  $t_{\text{R}}$  = 13.062 min (minor), 16.379 min (major).

**(*R*)-2-(3-fluorophenyl)-4-phenyl-6-vinyl-5,6-dihydro-4*H*-1,3,4-oxadiazine (2i)**

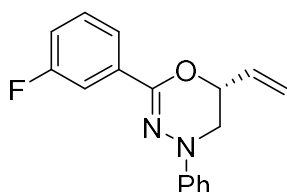

yellow oil, 21.1 mg, 75% yield, 93% ee,  $[\alpha]_{\text{D}}^{22}$  –55.0 (c 1.0, CH<sub>2</sub>Cl<sub>2</sub>). <sup>1</sup>H NMR (400 MHz, CDCl<sub>3</sub>)  $\delta$  7.72 (d,  $J$  = 3.6 Hz, 1H), 7.64 – 7.61 (m, 1H), 7.35 – 7.31 (m, 3H), 7.30 – 7.24 (m, 2H), 7.03 (dt,  $J$  = 8.0, 2.0 Hz, 1H), 6.91 (t,  $J$  = 3.2 Hz, 1H), 6.03 – 5.95 (m, 1H), 5.53 (d,  $J$  = 17.2 Hz, 1H), 5.40 (d,  $J$  = 10.4 Hz, 1H), 4.92 – 4.89 (m, 1H), 3.93 (dd,  $J$  = 11.6, 2.8 Hz, 1H), 3.36 (q,  $J$  = 7.2 Hz, 1H). <sup>13</sup>C NMR (100 MHz, CDCl<sub>3</sub>)  $\delta$  162.83 (d,  $J$  = 242.9 Hz), 146.82, 142.10 (d,  $J$  = 3.5 Hz), 134.85 (d,  $J$  = 8.4 Hz), 133.73, 129.63 (d,  $J$  = 8.2 Hz), 129.15, 120.98 (d,  $J$  = 2.9 Hz), 120.22, 118.77, 115.85 (d,  $J$  = 21.3 Hz), 113.50, 112.29 (d,  $J$  = 23.9 Hz), 73.00, 46.60. <sup>19</sup>F NMR (376 MHz, CDCl<sub>3</sub>)  $\delta$  –113.43. HRMS (ESI): Exact Mass Calcd. for C<sub>17</sub>H<sub>16</sub>FN<sub>2</sub>O (M+H): 283.1241, Found: 283.1232. HPLC (OD–H, *n*-hexane/*i*-PrOH = 99/1, flow rate = 1.0 mL/min,  $\lambda$  = 254 nm)  $t_{\text{R}}$  = 7.941 min (minor), 8.720 min (major).

**(*R*)-2-(3-chlorophenyl)-4-phenyl-6-vinyl-5,6-dihydro-4*H*-1,3,4-oxadiazine (2j)**

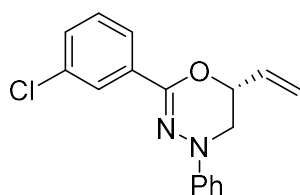

yellow oil, 22.9 mg, 77% yield, 95% ee,  $[\alpha]_{\text{D}}^{21}$  –46.0 (c 1.0, CH<sub>2</sub>Cl<sub>2</sub>). <sup>1</sup>H NMR (400 MHz, CDCl<sub>3</sub>)  $\delta$  7.91 (s, 1H), 7.83 – 7.80 (m, 1H), 7.35 – 7.29 (m, 4H), 7.27 – 7.25 (m, 2H), 7.92 (t,  $J$  = 3.6 Hz, 1H), m (6.04 – 5.96, 1H), 5.54 (d,  $J$  = 1.2 Hz, 1H), 5.41 (d,  $J$  = 10.8 Hz, 1H), 4.93 – 4.90 (m, 1H), 3.94 (dd,  $J$  = 11.6, 2.8 Hz, 1H), 3.40 – 3.35 (m, 1H). <sup>13</sup>C NMR (100 MHz, CDCl<sub>3</sub>)  $\delta$  146.80, 141.94, 134.37, 134.24, 133.71, 129.40, 129.16, 128.95, 125.38, 123.45, 120.26, 118.85, 113.52, 73.04, 46.61. HRMS (ESI): Exact Mass Calcd. for C<sub>17</sub>H<sub>16</sub>ClN<sub>2</sub>O (M+H): 299.0946, Found: 299.0943. HPLC (OD–H, *n*-hexane/*i*-PrOH = 99/1, flow rate = 1.0 mL/min,  $\lambda$  = 254 nm)  $t_{\text{R}}$  = 14.012 min (minor), 16.586 min (major).

**(*R*)-2-(3-bromophenyl)-4-phenyl-6-vinyl-5,6-dihydro-4*H*-1,3,4-oxadiazine (2k)**

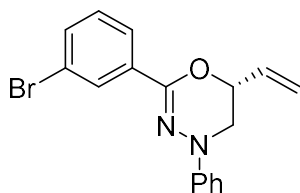

yellow oil, 24.9 mg, 73% yield, 94% ee,  $[\alpha]_{\text{D}}^{22} -43.0$  (c 1.0,  $\text{CH}_2\text{Cl}_2$ ).  $^1\text{H}$  NMR (400 MHz,  $\text{CDCl}_3$ )  $\delta$  8.05 (s, 1H), 7.85 (d,  $J = 6.8$  Hz, 1H), 7.47 – 7.44 (m, 1H), 7.34 – 7.30 (m, 2H), 7.26 – 7.20 (m, 3H), 6.93 – 6.89 (m, 1H), 6.02 – 5.93 (m, 1H), 5.52 (d,  $J = 13.6$  Hz, 1H), 5.39 (d,  $J = 10.4$  Hz, 1H), 4.90 – 4.86 (m, 1H), 3.91 (dd,  $J = 11.6, 3.2$  Hz, 1H), 3.34 (q,  $J = 7.2$  Hz, 1H).  $^{13}\text{C}$  NMR (100 MHz,  $\text{CDCl}_3$ )  $\delta$  146.76, 141.75, 134.58, 133.69, 131.84, 129.66, 129.14, 128.24, 123.88, 122.35, 120.25, 118.84, 113.51, 73.01, 46.57. HRMS (ESI): Exact Mass Calcd. for  $\text{C}_{17}\text{H}_{16}\text{BrN}_2\text{O}$  ( $\text{M}+\text{H}$ ): 343.0441, Found: 343.0441. HPLC (OD-H,  $n$ -hexane/ $i$ -PrOH = 99/1, flow rate = 1.0 mL/min,  $\lambda = 254$  nm)  $t_{\text{R}} = 8.571$  min (minor), 9.086 min (major).

**(R)-4-phenyl-2-(*m*-tolyl)-6-vinyl-5,6-dihydro-4H-1,3,4-oxadiazine (2l)**

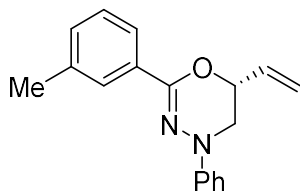

yellow oil, 16.7 mg, 60% yield, 93% ee.  $[\alpha]_{\text{D}}^{24} -88.0$  (c 0.5,  $\text{CH}_2\text{Cl}_2$ ).  $^1\text{H}$  NMR (400 MHz,  $\text{CDCl}_3$ )  $\delta$  7.75 – 7.73 (m, 2H), 7.33 – 7.29 (m, 2H), 7.27 – 7.19 (m, 3H), 7.17 – 7.15 (m, 1H), 6.9 – 6.87 (m, 1H), 6.02 – 5.94 (m, 1H), 5.54 – 5.49 (m, 1H), 5.39 – 5.36 (m, 1H), 4.90 – 4.86 (m, 1H), 3.89 (dd,  $J = 12.0, 3.2$  Hz, 1H), 3.32 (q,  $J = 7.2$  Hz, 1H), 2.38 (s, 3H).  $^{13}\text{C}$  NMR (100 MHz,  $\text{CDCl}_3$ )  $\delta$  147.11, 143.34, 137.72, 133.99, 132.47, 129.89, 129.08, 128.05, 125.92, 122.60, 119.88, 118.52, 113.44, 72.96, 46.62, 21.52. HRMS (ESI): Exact Mass Calcd. for  $\text{C}_{18}\text{H}_{19}\text{N}_2\text{O}$  ( $\text{M}+\text{H}$ ): 279.1492, Found: 279.1491. HPLC (OD-H,  $n$ -hexane/ $i$ -PrOH = 99/1, flow rate = 1.0 mL/min,  $\lambda = 254$  nm)  $t_{\text{R}} = 6.789$  min (minor), 7.377 min (major).

**(R)-2-(2-fluorophenyl)-4-phenyl-6-vinyl-5,6-dihydro-4H-1,3,4-oxadiazine (2m)**

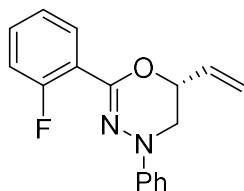

yellow oil, 22.5 mg, 80% yield, 94% ee,  $[\alpha]_{\text{D}}^{22} -35.0$  (c 1.0,  $\text{CH}_2\text{Cl}_2$ ).  $^1\text{H}$  NMR (400 MHz,  $\text{CDCl}_3$ )  $\delta$  7.80 (dt,  $J = 8.0, 1.6$  Hz, 1H), 7.33 – 7.30 (m, 3H), 7.23 – 7.29 (m, 2H), 7.16 – 7.07 (m, 2H), 6.91 – 6.88 (m, 1H), 6.07 – 5.95 (m, 1H), 5.55 (d,  $J = 17.2$  Hz, 1H), 5.39 (d,  $J = 10.8$  Hz, 1H), 4.95 – 4.91 (m, 1H), 3.94 (dd,  $J = 11.6, 2.8$  Hz, 1H), 3.37 (q,  $J = 7.2$  Hz, 1H).  $^{13}\text{C}$  NMR (100 MHz,  $\text{CDCl}_3$ )  $\delta$  160.30 (d,  $J = 254.2$  Hz), 146.92, 140.96 (d,  $J = 5.4$  Hz), 133.74, 130.45 (d,  $J = 8.3$  Hz), 129.12, 123.73 (d,  $J = 3.8$  Hz), 120.77 (d,  $J = 9.5$  Hz), 120.12, 118.67, 116.77, 116.55, 113.42, 73.05, 46.65.  $^{19}\text{F}$  NMR

(376 MHz, CDCl<sub>3</sub>)  $\delta$  -111.74. HRMS (ESI): Exact Mass Calcd. for C<sub>17</sub>H<sub>16</sub>FN<sub>2</sub>O (M+H): 283.1241, Found: 283.1242. HPLC (OD-H, *n*-hexane/*i*-PrOH = 99/1, flow rate = 1.0 mL/min,  $\lambda$  = 254 nm)  $t_R$  = 8.717 min (minor), 10.205 min (major).

**(*R*)-2-(2-chlorophenyl)-4-phenyl-6-vinyl-5,6-dihydro-4*H*-1,3,4-oxadiazine (2n)**

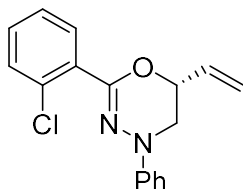

yellow oil, 21.7 mg, 73% yield, 92% ee,  $[\alpha]_D^{23}$  -17.0 (c 1.0, CH<sub>2</sub>Cl<sub>2</sub>). <sup>1</sup>H NMR (400 MHz, CDCl<sub>3</sub>)  $\delta$  7.71 – 7.69 (m, 1H), 7.45 – 7.40 (m, 1H), 7.32 – 7.24 (m, 6H), 6.90 (t,  $J$  = 7.2 Hz, 1H), 6.05 – 5.97 (m, 1H), 5.55 (d,  $J$  = 17.2 Hz, 1H), 5.39 (d,  $J$  = 10.8 Hz, 1H), m (4.97 – 4.93, 1H), 3.97 (dd,  $J$  = 11.6, 2.8 Hz, 1H), 3.38 (t,  $J$  = 7.6 Hz, 1H). <sup>13</sup>C NMR (100 MHz, CDCl<sub>3</sub>)  $\delta$  146.96, 142.95, 133.72, 132.68, 131.80, 130.66, 130.51, 130.01, 129.11, 126.52, 120.18, 118.91, 113.57, 73.34, 46.83. HRMS (ESI): Exact Mass Calcd. for C<sub>17</sub>H<sub>16</sub>ClN<sub>2</sub>O (M+H): 299.0946, Found: 299.0941. HPLC (OD-H, *n*-hexane/*i*-PrOH = 99/1, flow rate = 1.0 mL/min,  $\lambda$  = 254 nm)  $t_R$  = 9.137 min (minor), 11.233 min (major).

**(*R*)-2-(2-bromophenyl)-4-phenyl-6-vinyl-5,6-dihydro-4*H*-1,3,4-oxadiazine (2o)**

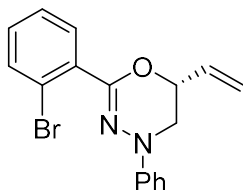

yellow oil, 24.7 mg, 72% yield, 92% ee,  $[\alpha]_D^{22}$  -16.0 (c 1.0, CH<sub>2</sub>Cl<sub>2</sub>). <sup>1</sup>H NMR (400 MHz, CDCl<sub>3</sub>)  $\delta$  7.67 – 7.62 (m, 2H), 7.35 – 7.25 (m, 3H), 7.27 – 7.24 (m, 2H), 7.21 (dt  $J$  = 7.6, 1.6 Hz, 1H), 6.91 – 6.88 (m, 1H), 6.06 – 5.98 (m, 1H), 5.55 (d,  $J$  = 17.2 Hz, 1H), 5.40 (d,  $J$  = 10.4 Hz, 1H), 4.97 – 4.93 (m, 1H), 3.97 (dd,  $J$  = 11.6, 2.8 Hz, 1H), 3.37 (t,  $J$  = 7.6 Hz, 1H). <sup>13</sup>C NMR (100 MHz, CDCl<sub>3</sub>)  $\delta$  146.95, 143.75, 133.86, 133.82, 133.70, 130.82, 130.26, 129.10, 127.13, 121.62, 120.18, 118.99, 113.61, 73.40, 46.87. HRMS (ESI): Exact Mass Calcd. for C<sub>17</sub>H<sub>16</sub>BrN<sub>2</sub>O (M+H): 343.0441, Found: 343.0442. HPLC (OD-H, *n*-hexane/*i*-PrOH = 99/1, flow rate = 1.0 mL/min,  $\lambda$  = 254 nm)  $t_R$  = 9.548 min (minor), 11.412 min (major).

**(*R*)-4-phenyl-2-(*o*-tolyl)-6-vinyl-5,6-dihydro-4*H*-1,3,4-oxadiazine (2p)**

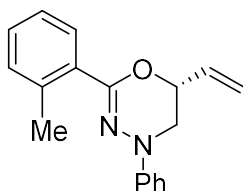

yellow oil, 18.9 mg, 68% yield, 89% ee,  $[\alpha]_D^{24}$  -16.0 (c 0.5, CH<sub>2</sub>Cl<sub>2</sub>). <sup>1</sup>H NMR (400 MHz, CDCl<sub>3</sub>)  $\delta$  7.74 – 7.72 (m, 1H), 7.32 – 7.28 (m, 2H), 7.25 – 7.20 (m, 5H), 6.88 (t,  $J$  = 3.2 Hz, 1H), 6.45 – 5.96

(m, 1H), 5.52 (d,  $J = 17.2$  Hz, 1H), 5.38 (d,  $J = 10.8$  Hz, 1H), 4.94 – 4.90 (m, 1H), 3.94 (dd,  $J = 11.6$ , 3.2 Hz, 1H), 3.35 (q,  $J = 3.2$  Hz, 1H), 2.62 (s, 3H).  $^{13}\text{C}$  NMR (100 MHz,  $\text{CDCl}_3$ )  $\delta$  147.17, 144.55, 136.93, 134.03, 131.85, 131.29, 129.10, 128.83, 128.28, 125.61, 119.84, 118.61, 113.32, 73.09, 46.59, 22.44. HRMS (ESI): Exact Mass Calcd. for  $\text{C}_{18}\text{H}_{19}\text{N}_2\text{O}$  ( $\text{M}+\text{H}$ ): 279.1492, Found: 279.1486. HPLC (OD–H,  $n$ -hexane/ $i$ -PrOH = 99/1, flow rate = 1.0 mL/min,  $\lambda = 254$  nm)  $t_{\text{R}} = 7.492$  min (minor), 8.428 min (major).

**(*R*)-2-(3,4-dichlorophenyl)-4-phenyl-6-vinyl-5,6-dihydro-4*H*-1,3,4-oxadiazine (2q)**

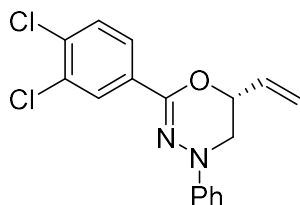

colorless oil, 20.6 mg, 62% yield, 75% ee,  $[\alpha]_{\text{D}}^{24} +2.0$  (c 0.5,  $\text{CH}_2\text{Cl}_2$ ).  $^1\text{H}$  NMR (400 MHz,  $\text{CDCl}_3$ )  $\delta$  7.99 (d,  $J = 2.0$  Hz, 1H), 7.76 (dd,  $J = 8.4$ , 2.0 Hz, 1H), 7.43 (d,  $J = 8.4$  Hz, 1H), 7.36 – 7.32 (m, 2H), 7.26 – 7.24 (m, 2H), 6.93 (t,  $J = 7.2$  Hz, 1H), 6.04 – 5.95 (m, 1H), 5.53 (d,  $J = 17.6$  Hz, 1H), 5.42 (d,  $J = 10.8$  Hz, 1H), 4.93 – 4.89 (m, 1H), 3.95 (dd,  $J = 11.6$ , 2.8 Hz, 1H), 3.38 (t,  $J = 7.2$  Hz, 1H).  $^{13}\text{C}$  NMR (100 MHz,  $\text{CDCl}_3$ )  $\delta$  146.66, 141.28, 133.59, 132.86, 132.58, 132.46, 130.14, 129.20, 127.08, 124.52, 120.45, 119.03, 113.56, 73.12, 46.60. HRMS (ESI): Exact Mass Calcd. for  $\text{C}_{17}\text{H}_{15}\text{Cl}_2\text{N}_2\text{O}$  ( $\text{M}+\text{H}$ ): 333.0556, Found: 333.0556. HPLC (OD–H,  $n$ -hexane/ $i$ -PrOH = 99/1, flow rate = 1.0 mL/min,  $\lambda = 254$  nm)  $t_{\text{R}} = 10.274$  min (minor), 11.611 min (major).

**(*R*)-2-(naphthalen-2-yl)-4-phenyl-6-vinyl-5,6-dihydro-4*H*-1,3,4-oxadiazine (2r)**

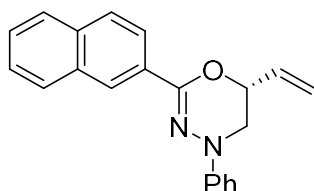

white solid, mp 108.2 – 113.0°C, 22.3 mg, 71% yield, 89% ee,  $[\alpha]_{\text{D}}^{24} -18.0$  (c 0.5,  $\text{CH}_2\text{Cl}_2$ ).  $^1\text{H}$  NMR (400 MHz,  $\text{CDCl}_3$ )  $\delta$  8.32 (s, 1H), 8.15 (d,  $J = 12.0$  Hz, 1H), 7.90 – 7.81 (m, 3H), 7.50 – 7.46 (m, 2H), 7.38 – 7.32 (m, 4H), 6.95 – 6.90 (m, 1H), 6.11 – 6.03 (m, 1H), 5.60 (d,  $J = 17.2$  Hz, 1H), 5.44 (d,  $J = 10.4$  Hz, 1H), 5.01 – 4.98 (m, 1H), 3.99 (dd,  $J = 11.6$ , 2.8 Hz, 1H), 3.44 (q,  $J = 7.2$  Hz, 1H).  $^{13}\text{C}$  NMR (100 MHz,  $\text{CDCl}_3$ )  $\delta$  147.04, 143.26, 134.02, 133.76, 133.12, 129.93, 129.16, 128.57, 127.74, 126.44, 126.26, 124.52, 123.25, 120.06, 118.76, 113.50, 73.07, 46.72. HRMS (ESI): Exact Mass Calcd. for  $\text{C}_{21}\text{H}_{19}\text{N}_2\text{O}$  ( $\text{M}+\text{H}$ ): 315.1492, Found: 315.1488. HPLC (OD–H,  $n$ -hexane/ $i$ -PrOH = 99/1, flow rate = 1.0 mL/min,  $\lambda = 254$  nm)  $t_{\text{R}} = 13.098$  min (minor), 19.502 min (major).

**(*R*)-2-(naphthalen-1-yl)-4-phenyl-6-vinyl-5,6-dihydro-4*H*-1,3,4-oxadiazine (2s)**

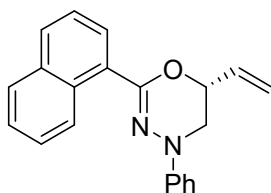

yellow oil, 21.6 mg, 69% yield, 94% ee,  $[\alpha]_D^{24} -32.0$  (c 0.5,  $\text{CH}_2\text{Cl}_2$ ).  $^1\text{H}$  NMR (400 MHz,  $\text{CDCl}_3$ )  $\delta$  8.92 (d,  $J = 8.4$  Hz, 1H), 7.94 – 7.93 (m, 1H), 7.88 – 7.86 (m, 2H), 7.58 – 7.47 (m, 3H), 7.35 – 7.28 (m, 4H), 6.93 – 6.90 (m, 1H), 6.12 – 6.04 (m, 1H), 5.68 (d,  $J = 17.2$  Hz, 1H), 5.43 (d,  $J = 10.4$  Hz, 1H), 5.08 – 5.04 (m, 1H), 4.05 (dd,  $J = 11.6, 2.8$  Hz, 1H), 3.49 (q,  $J = 7.2$  Hz, 1H).  $^{13}\text{C}$  NMR (100 MHz,  $\text{CDCl}_3$ )  $\delta$  147.14, 144.16, 134.09, 133.99, 130.02, 129.21, 128.48, 126.96, 126.66, 126.39, 125.82, 124.92, 120.03, 118.86, 113.42, 73.38, 46.73. HRMS (ESI): Exact Mass Calcd. for  $\text{C}_{21}\text{H}_{19}\text{N}_2\text{O}$  ( $\text{M}+\text{H}$ ): 315.1492, Found: 315.1487. HPLC (IF,  $n$ -hexane/ $i$ -PrOH = 99/1, flow rate = 0.5 mL/min,  $\lambda = 254$  nm)  $t_R = 15.311$  min (major), 16.658 min (minor).

**(R)-2-(benzo[*d*][1,3]dioxol-5-yl)-4-phenyl-6-vinyl-5,6-dihydro-4H-1,3,4-oxadiazine (2t)**

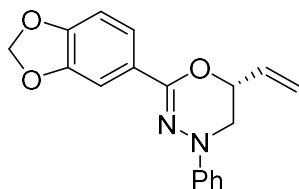

Colorless oil, 19.1 mg, 62% yield, 75% ee,  $[\alpha]_D^{24} -2.0$  (c 0.5,  $\text{CH}_2\text{Cl}_2$ ).  $^1\text{H}$  NMR (400 MHz,  $\text{CDCl}_3$ )  $\delta$  7.45 – 7.44 (m, 2H), 7.33 – 7.29 (m, 2H), 7.26 – 7.24 (m, 2H), 6.89 (t,  $J = 7.2$  Hz, 1H), 6.81 – 6.79 (m, 1H), 6.03 – 5.95 (m, 3H), 5.52 (d,  $J = 17.2$  Hz, 1H), 5.39 (d,  $J = 10.4$  Hz, 1H), 4.90 – 4.89 (m, 1H), 3.91 (dd,  $J = 11.6, 2.8$  Hz, 1H), 3.32 (q,  $J = 7.6$  Hz, 1H).  $^{13}\text{C}$  NMR (100 MHz,  $\text{CDCl}_3$ )  $\delta$  148.54, 147.65, 147.11, 143.06, 133.95, 129.10, 126.82, 119.84, 119.63, 118.57, 113.37, 107.87, 106.01, 101.26, 73.10, 46.65. HRMS (ESI): Exact Mass Calcd. for  $\text{C}_{18}\text{H}_{17}\text{N}_2\text{O}_3$  ( $\text{M}+\text{H}$ ): 309.1234, Found: 309.1236. HPLC (OD-H,  $n$ -hexane/ $i$ -PrOH = 99/1, flow rate = 1.0 mL/min,  $\lambda = 254$  nm)  $t_R = 13.696$  min (minor), 15.502 min (major).

**(R)-4-phenyl-2-(thiophen-2-yl)-6-vinyl-5,6-dihydro-4H-1,3,4-oxadiazine (2u)**

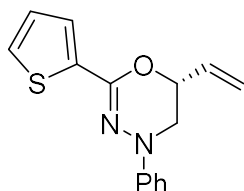

yellow oil, 19.7 mg, 73% yield, 92% ee,  $[\alpha]_D^{23} -43.0$  (c 1.0,  $\text{CH}_2\text{Cl}_2$ ).  $^1\text{H}$  NMR (400 MHz,  $\text{CDCl}_3$ )  $\delta$  7.42 – 7.41 (m, 1H), 7.33 – 7.26 (m, 3H), 7.24 – 7.21 (m, 2H), 7.01 (t,  $J = 3.6$  Hz, 1H), 6.89 (dt,  $J = 7.2, 0.8$  Hz, 1H), 6.02 – 5.94 (m, 1H), 5.52 (d,  $J = 17.2$  Hz, 1H), 5.39 (d,  $J = 10.4$  Hz, 1H), 4.93 – 4.89 (m, 1H), 3.91 (dd,  $J = 11.6$  Hz, 2.8 Hz, 1H), 3.38 – 3.33 (m, 1H).  $^{13}\text{C}$  NMR (100 MHz,  $\text{CDCl}_3$ )  $\delta$  146.75, 141.10, 136.36, 133.67, 129.10, 127.16, 126.48, 125.35, 120.04, 118.80, 113.43, 73.39, 46.80. HRMS (ESI): Exact Mass Calcd. for  $\text{C}_{15}\text{H}_{15}\text{N}_2\text{OS}$  ( $\text{M}+\text{H}$ ): 271.0900, Found: 271.0893. HPLC (OD–



H, *n*-hexane/*i*-PrOH = 99/1, flow rate = 1.0 mL/min,  $\lambda$  = 254 nm)  $t_R$  = 9.576 min (minor), 10.188 min (major).

**(*R*)-2-(furan-2-yl)-4-phenyl-6-vinyl-5,6-dihydro-4*H*-1,3,4-oxadiazine (2v)**

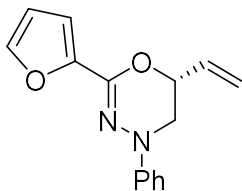

yellow oil, 16.2 mg, 64% yield, 92% ee,  $[\alpha]_D^{24}$  -18.0 (c 0.5, CH<sub>2</sub>Cl<sub>2</sub>). <sup>1</sup>H NMR (400 MHz, CDCl<sub>3</sub>)  $\delta$  7.48 (s, 1H), 7.48 – 7.31 (m, 2H), 7.23 – 7.25 (m, 2H), 6.90 (t,  $J$  = 7.2 Hz, 1H), 6.74 (d,  $J$  = 3.6 Hz, 1H), 6.46 – 6.45 (m, 1H), 6.03 – 5.95 (m, 1H), 5.53 (d,  $J$  = 17.6 Hz, 1H), 5.40 (d,  $J$  = 10.4 Hz, 1H), 4.94 – 4.90 (m, 1H), 3.94 (dd,  $J$  = 11.6, 2.8 Hz, 1H), 3.40 (q,  $J$  = 7.2 Hz, 1H). <sup>13</sup>C NMR (100 MHz, CDCl<sub>3</sub>)  $\delta$  146.82, 146.39, 143.29, 138.00, 133.60, 129.14, 120.25, 119.04, 113.67, 111.24, 109.32, 73.32, 47.08. HRMS (ESI): Exact Mass Calcd. for C<sub>15</sub>H<sub>15</sub>N<sub>2</sub>O<sub>2</sub> (M+H): 255.1128, Found: 255.1121. HPLC (OD-H, *n*-hexane/*i*-PrOH = 99/1, flow rate = 1.0 mL/min,  $\lambda$  = 254 nm)  $t_R$  = 11.214 min (minor), 12.568 min (major).

**(*R*)-2-phenyl-4-(*p*-tolyl)-6-vinyl-5,6-dihydro-4*H*-1,3,4-oxadiazine (2w)**

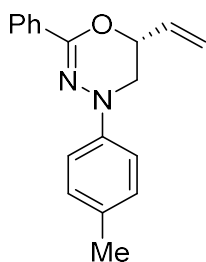

yellow oil, 14.5 mg, 52% yield, 87% ee,  $[\alpha]_D^{24}$  -2.0 (c 0.5, CH<sub>2</sub>Cl<sub>2</sub>). <sup>1</sup>H NMR (400 MHz, CDCl<sub>3</sub>)  $\delta$  7.95 – 7.93 (m, 2H), 7.39 – 7.36 (m, 3H), 7.19 – 7.11 (m, 4H), 6.05 – 5.97 (m, 1H), 5.53 (d,  $J$  = 17.2 Hz, 1H), 5.39 (d,  $J$  = 10.4 Hz, 1H), 4.94 – 4.93 (m, 1H), 3.90 (dd,  $J$  = 11.6, 3.2 Hz, 1H), 3.32 (q,  $J$  = 2.8 Hz, 1H), 2.30 (s, 3H). <sup>13</sup>C NMR (100 MHz, CDCl<sub>3</sub>)  $\delta$  145.17, 143.07, 134.11, 132.67, 129.62, 129.37, 128.98, 128.13, 125.35, 118.46, 113.74, 73.13, 47.13, 20.54. HRMS (ESI): Exact Mass Calcd. for C<sub>18</sub>H<sub>19</sub>N<sub>2</sub>O (M+H): 279.1492, Found: 279.1489. HPLC (AD-H, *n*-hexane/*i*-PrOH = 99/1, flow rate = 1.0 mL/min,  $\lambda$  = 254 nm)  $t_R$  = 8.890 min (minor), 9.874 min (major).

**(*R*)-2-benzyl-4-phenyl-6-vinyl-5,6-dihydro-4*H*-1,3,4-oxadiazine (2x)**

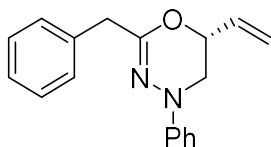

yellow solid, mp 65.8 – 67.9°C, 16.4 mg, 59% yield, 87% ee,  $[\alpha]_D^{24}$  -16.0 (c 0.5, CH<sub>2</sub>Cl<sub>2</sub>). <sup>1</sup>H NMR (400 MHz, CDCl<sub>3</sub>)  $\delta$  7.36 – 7.35 (m, 2H), 7.32 – 7.22 (m, 5H), 7.15 (d,  $J$  = 8.0 Hz, 2H), 6.86 (t,  $J$  =

7.2 Hz, 1H), 5.89 – 5.80 (m, 1H), 5.28 (dd,  $J = 17.2, 10.8$  Hz, 2H), 4.78 – 4.74 (m, 1H), 3.75 (dd,  $J = 11.6, 2.8$  Hz, 1H), 3.61 (s, 2H), 3.16 (q,  $J = 7.2$  Hz, 1H).  $^{13}\text{C}$  NMR (100 MHz,  $\text{CDCl}_3$ )  $\delta$  147.63, 147.05, 136.88, 133.98, 129.05, 128.96, 128.39, 126.66, 119.87, 118.32, 113.68, 73.68, 46.71, 40.05. HRMS (ESI): Exact Mass Calcd. for  $\text{C}_{18}\text{H}_{19}\text{N}_2\text{O}$  ( $\text{M}+\text{H}$ ): 279.1492, Found: 279.1486. HPLC (OD–H, *n*-hexane/*i*-PrOH = 99/1, flow rate = 1.0 mL/min,  $\lambda = 254$  nm)  $t_{\text{R}} = 8.711$  min (minor), 12.098 min (major).

**(*R*)-2-phenyl-5-vinyl-4,5-dihydrooxazole (4a)**

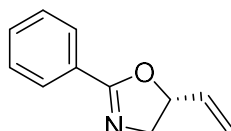

yellow oil, 11.9 mg, 69% yield, 91% ee,  $[\alpha]_{\text{D}}^{25} +2$  (c 0.5,  $\text{CH}_2\text{Cl}_2$ ).  $^1\text{H}$  NMR (400 MHz,  $\text{CDCl}_3$ )  $\delta$  7.98 – 7.96 (m, 2H), 7.50 – 7.47 (m, 1H), 7.43 – 7.39 (m, 2H), 6.01 – 5.92 (m, 1H), 5.39 (d,  $J = 17.2$  Hz, 1H), 5.26 (d,  $J = 10.0$  Hz, 1H), 5.16 – 5.10 (m, 1H), 4.22 (dd,  $J = 14.4, 10.0$  Hz, 1H), 3.79 (dd,  $J = 14.4, 7.6$  Hz, 1H).  $^{13}\text{C}$  NMR (100 MHz,  $\text{CDCl}_3$ )  $\delta$  164.02, 136.42, 131.42, 128.40, 128.45, 127.71, 117.41, 80.56, 60.55. HRMS (ESI): Exact Mass Calcd. for  $\text{C}_{11}\text{H}_{12}\text{NO}$  ( $\text{M}+\text{H}$ ): 174.0913, Found: 174.0921. HPLC (OD–H, *n*-hexane/*i*-PrOH = 90/10, flow rate = 1.0 mL/min,  $\lambda = 254$  nm)  $t_{\text{R}} = 5.896$  min (minor), 14.120 min (major).

**(*R*)-2-(4-chlorophenyl)-5-vinyl-4,5-dihydrooxazole (4b)**

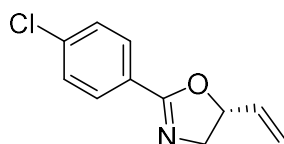

yellow oil, 14.1 mg, 68% yield, 90% ee,  $[\alpha]_{\text{D}}^{26} -16$  (c 0.5,  $\text{CH}_2\text{Cl}_2$ ).  $^1\text{H}$  NMR (400 MHz,  $\text{CDCl}_3$ )  $\delta$  7.89 (d,  $J = 8.8$  Hz, 2H), 7.39 (d,  $J = 8.8$  Hz, 2H), 6.00 – 5.91 (m, 1H), 5.38 (d,  $J = 16.8$  Hz, 1H), 5.27 (d,  $J = 10.4$  Hz, 1H), 5.15 – 5.09 (m, 1H), 4.21 (dd,  $J = 14.8, 10.0$  Hz, 1H), 3.78 (dd,  $J = 14.8, 8.0$  Hz, 1H).  $^{13}\text{C}$  NMR (100 MHz,  $\text{CDCl}_3$ )  $\delta$  163.14, 137.60, 136.23, 129.59, 128.71, 126.23, 117.61, 80.79, 60.60. HRMS (ESI): Exact Mass Calcd. for  $\text{C}_{11}\text{H}_{11}\text{ClNO}$  ( $\text{M}+\text{H}$ ): 208.0524, Found: 208.0522. HPLC (OD–H, *n*-hexane/*i*-PrOH = 90/10, flow rate = 1.0 mL/min,  $\lambda = 254$  nm)  $t_{\text{R}} = 5.600$  min (minor), 9.323 min (major).

**(*R*)-2-phenyl-6-vinyl-5,6-dihydro-4*H*-1,3-oxazine (4c)**

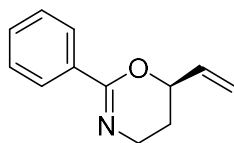

yellow oil, 12.5 mg, 67% yield, 91% ee,  $[\alpha]_{\text{D}}^{26} +2$  (c 0.5,  $\text{CH}_2\text{Cl}_2$ ).  $^1\text{H}$  NMR (400 MHz,  $\text{CDCl}_3$ )  $\delta$  7.96 – 7.93 (m, 2H), 7.44 – 7.35 (m, 3H), 6.01 – 5.92 (m, 1H), 5.39 (dt,  $J = 17.2, 1.2$  Hz, 1H), 5.28 (dt,  $J =$

10.8, 1.6 Hz, 1H), 4.81 – 4.76 (m, 1H), 3.69 – 3.56 (m, 2H), 2.09 – 2.02 (m, 1H), 1.83 – 1.80 (m, 1H).  $^{13}\text{C}$  NMR (100 MHz,  $\text{CDCl}_3$ )  $\delta$  155.35, 136.76, 133.98, 130.41, 128.07, 127.00, 116.35, 74.90, 42.04, 27.04. HRMS (ESI): Exact Mass Calcd. for  $\text{C}_{12}\text{H}_{14}\text{NO}$  (M+H): 188.1070, Found: 188.1079. HPLC (OD–H, *n*-hexane/*i*-PrOH = 90/10, flow rate = 1.0 mL/min,  $\lambda$  = 254 nm)  $t_{\text{R}}$  = 5.317 min (minor), 8.465 min (major).

**(*R*)-2-(4-chlorophenyl)-6-vinyl-5,6-dihydro-4*H*-1,3-oxazine (4d)**

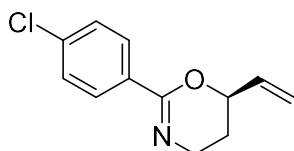

yellow oil, 12.2 mg, 55% yield, 95% ee,  $[\alpha]_{\text{D}}^{25} +2$  (c 0.5,  $\text{CH}_2\text{Cl}_2$ ).  $^1\text{H}$  NMR (400 MHz,  $\text{CDCl}_3$ )  $\delta$  7.88 (d,  $J$  = 8.8 Hz, 2H), 7.34 (d,  $J$  = 8.4 Hz, 2H), 5.99 – 5.91 (m, 1H), 5.37 (d,  $J$  = 17.2 Hz, 1H), 5.28 (d,  $J$  = 10.8 Hz, 1H), 4.78 – 4.75 (m, 1H), 3.68 – 3.55 (m, 2H), 2.08 – 2.02 (m, 1H), 1.83 – 1.73 (m, 1H).  $^{13}\text{C}$  NMR (100 MHz,  $\text{CDCl}_3$ )  $\delta$  154.50, 136.58, 136.50, 132.45, 128.40, 128.29, 116.53, 75.04, 42.03, 26.95. HRMS (ESI): Exact Mass Calcd. for  $\text{C}_{12}\text{H}_{13}\text{ClNO}$  (M+H): 222.0680, Found: 222.0690. HPLC (OD–H, *n*-hexane/*i*-PrOH = 90/10, flow rate = 1.0 mL/min,  $\lambda$  = 254 nm)  $t_{\text{R}}$  = 5.197 min (minor), 8.077 min (major).

**(*R*)-3-phenyl-5-vinyl-5,6-dihydro-1,4,2-dioxazine (4e)**

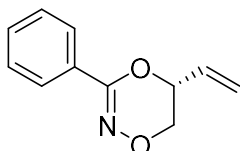

yellow oil, 11.7 mg, 62% yield, 54% ee,  $[\alpha]_{\text{D}}^{26} -2$  (c 0.5,  $\text{CH}_2\text{Cl}_2$ ).  $^1\text{H}$  NMR (400 MHz,  $\text{CDCl}_3$ )  $\delta$  7.85 – 7.83 (m, 2H), 7.45 – 7.36 (m, 3H), 5.97 – 5.89 (m, 1H), 5.54 (d,  $J$  = 17.6 Hz, 1H), 5.44 (d,  $J$  = 10.8 Hz, 1H), 4.93 – 4.89 (m, 1H), 4.27 (dd,  $J$  = 11.6, 2.8 Hz, 1H), 3.78 (dd,  $J$  = 11.6, 7.6 Hz, 1H).  $^{13}\text{C}$  NMR (100 MHz,  $\text{CDCl}_3$ )  $\delta$  153.99, 131.79, 130.54, 130.47, 128.30, 125.77, 119.65, 74.24, 67.47. HRMS (ESI): Exact Mass Calcd. for  $\text{C}_{11}\text{H}_{12}\text{NO}_2$  (M+H): 190.0863, Found: 190.0864. HPLC (OD–H, *n*-hexane/*i*-PrOH = 90/10, flow rate = 1.0 mL/min,  $\lambda$  = 254 nm)  $t_{\text{R}}$  = 7.781 min (minor), 9.443 min (major).

**4. Synthetic transformations of compound 2a**

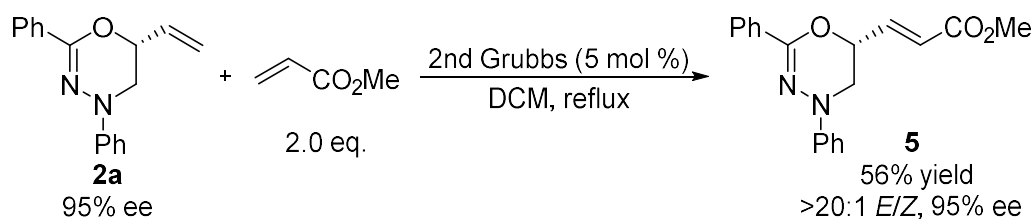

Under argon atmosphere, a solution of compound **2a** (26.4 mg, 0.1 mmol) and methyl acrylate (0.18 mL, 0.2 mmol, 2.0 equiv.) in DCM (2 mL) was treated with Grubbs 2<sup>nd</sup> catalyst (4.3 mg, 0.005 mmol, 5 mol %). The reaction mixture was refluxed for 12 h. After cooling to room temperature, DCM was evaporated under reduced pressure and the residue was purified by flash column chromatography on silica gel using petroleum ether/ethyl acetate (15/1) to afford product **5** (18.0 mg, 56% yield, >20:1 *E/Z*, 94% ee).

**methyl (*R,E*)-3-(2,4-diphenyl-5,6-dihydro-4*H*-1,3,4-oxadiazin-6-yl) acrylate (**5**).** white solid, mp 109.4 – 113.2 °C, 18.0 mg, 56% yield, 94% ee,  $[\alpha]_D^{24}$  –56.0 (c 0.5, CH<sub>2</sub>Cl<sub>2</sub>). <sup>1</sup>H NMR (400 MHz, CDCl<sub>3</sub>)  $\delta$  7.95 – 7.93 (m, 2H), 7.40 – 7.38 (m, 3H), 7.36 – 7.28 (m, 4H), 7.05 (dd, *J* = 20.0, 3.6 Hz, 1H), 6.93 (t, *J* = 7.2 Hz, 1H), 6.28 (dd, *J* = 16.0, 1.6 Hz, 1H), 5.17 – 5.13 (m, 1H), 4.00 (dd, *J* = 12.0, 3.2 Hz, 1H), 3.78 (s, 3H), 3.42 (q, *J* = 7.2 Hz, 1H). <sup>13</sup>C NMR (100 MHz, CDCl<sub>3</sub>)  $\delta$  166.15, 146.90, 142.65, 142.20, 132.09, 129.35, 129.18, 128.25, 125.38, 123.12, 120.44, 113.70, 71.27, 51.97, 46.07. HRMS (ESI): Exact Mass Calcd. for C<sub>19</sub>H<sub>19</sub>N<sub>2</sub>O<sub>3</sub> (M+H): 323.1390, Found: 323.1390. HPLC (OD–H, *n*-hexane/*i*-PrOH = 99/1, flow rate = 1.0 mL/min,  $\lambda$  = 254 nm) *t*<sub>R</sub> = 12.157 min (minor), 13.833 min (major).

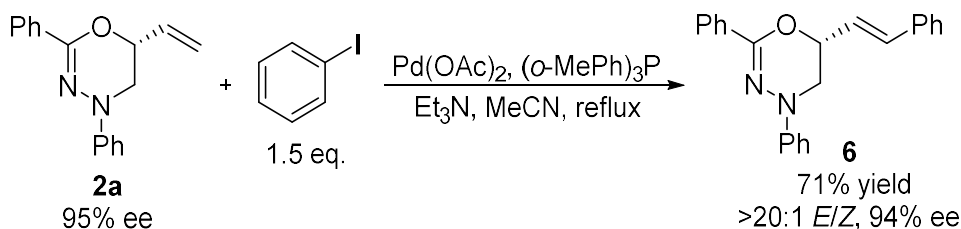

A solution of **2a** (39.6 mg, 0.15 mmol), iodobenzene (25  $\mu$ L, 0.225 mmol, 1.5 equiv.), palladium(II) acetate (2.03 mg, 0.009 mmol, 0.06 equiv.), tris(*o*-tolyl)phosphane (8.2 mg, 0.027 mmol, 0.18 equiv.) and triethylamine (31.2  $\mu$ L, 0.225 mmol, 1.5 equiv.) in acetonitrile (3 mL) was refluxed for 4 h under an nitrogen atmosphere. After cooling to room temperature, the solvent was removed under reduced pressure. The residue was dissolved in ethyl acetate (10 mL) and washed with sodium bicarbonate solution (10 mL $\times$ 3). The aqueous layer was extracted with ethyl acetate (10 mL $\times$ 3) and the combined organic layer was dried over anhydrous magnesium sulfate, filtered and concentrated under reduced pressure. The residue was purified by chromatography on silica gel using petroleum ether/ethyl acetate (19:1) as eluent to afford product **6** (36.2 mg, 71% yield, >20:1 *E/Z*, 94% ee).

**(*R,E*)-2,4-diphenyl-6-styryl-5,6-dihydro-4*H*-1,3,4-oxadiazine (**6**).** yellow oil, 36.2 mg, 71% yield, 94% ee,  $[\alpha]_D^{23}$  –7.0 (c 1.0, CH<sub>2</sub>Cl<sub>2</sub>). <sup>1</sup>H NMR (400 MHz, CDCl<sub>3</sub>)  $\delta$  7.98 – 7.96 (m, 2H), 7.45 – 7.43 (m, 2H), 7.39 – 7.24 (m, 10H), 6.93 – 6.89 (m, 1H), 6.84 (d, *J* = 16.0 Hz, 1H), 6.35 (q, *J* = 6.8 Hz, 1H), 5.10 – 5.06 (m, 1H), 4.01 (dd, *J* = 12.0, 3.2 Hz, 1H), 3.44 (q, *J* = 7.2 Hz, 1H). <sup>13</sup>C NMR (100 MHz, CDCl<sub>3</sub>)  $\delta$  147.11, 143.42, 135.84, 133.97, 132.59, 129.13, 128.75, 128.47, 128.17, 126.84, 125.45, 124.76, 119.98, 113.50, 73.27, 47.02. HRMS (ESI): Exact Mass Calcd. for C<sub>23</sub>H<sub>21</sub>N<sub>2</sub>O (M+H): 341.1648, Found: 341.1647. HPLC (OD–H, *n*-hexane/*i*-PrOH = 99/1, flow rate = 1.0 mL/min,  $\lambda$  = 254 nm) *t*<sub>R</sub> = 21.585 min (minor), 22.757 min (major).

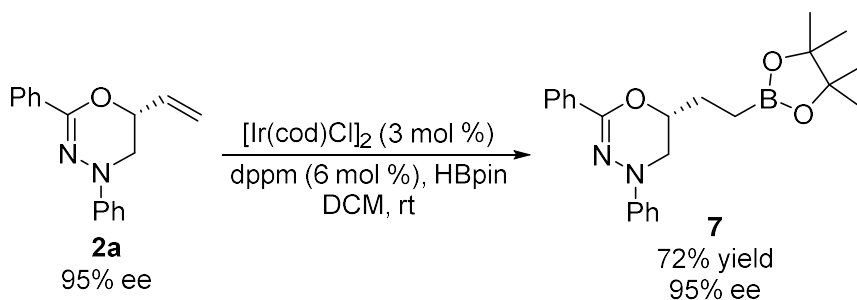

To a 25 mL Schlenk tube equipped with a magnetic stir bar was added **2a** (26.4 mg, 0.1 mmol),  $[\text{Ir(cod)Cl}]_2$  (2.01 mg, 0.003 mmol, 3 mol %) and dppm (2.3 mg, 0.006 mmol, 6 mol %). The flask tube was sealed, evacuated, and backfilled with argon three times using standard Schlenk techniques. DCM (2.0 mL) and HBpin (29  $\mu\text{L}$ , 0.2 mmol, 2.0 equiv.) was added and the reaction mixture was stirred for 12 h at room temperature. After the reaction was completed, the reaction was quenched with 2M HCl (2 mL) and extracted with EtOAc (10 mL $\times$ 3). The combined organic fractions were washed with brine (10 mL $\times$ 3), dried over  $\text{Na}_2\text{SO}_4$ , filtered, and concentrated under reduced pressure. The residue was purified by chromatography on silica gel using petroleum ether/ethyl acetate (9/1) to afford the product **7** (28.2 mg, 72% yield, 95% ee).

**(R)-2,4-diphenyl-6-(2-(4,4,5,5-tetramethyl-1,3,2-dioxaborolan-2-yl) ethyl)-5,6-dihydro-4H-1,3,4-oxadiazine (7)**. yellow oil, 28.2 mg, 72% yield, 95% ee,  $[\alpha]_D^{24} -10.0$  (c 0.5,  $\text{CH}_2\text{Cl}_2$ ).  $^1\text{H}$  NMR (400 MHz,  $\text{CDCl}_3$ )  $\delta$  7.94 – 7.91 (m, 2H), 7.39 – 7.28 (m, 7H), 6.90 – 6.86 (m, 1H), 4.40 – 4.34 (m, 1H), 3.93 (dd,  $J = 11.6$  Hz, 1H), 3.26 (q,  $J = 3.6$  Hz, 1H), 2.00 – 1.80 (m, 2H), 1.26 (s, 12H), 1.16 – 0.98 (m, 2H).  $^{13}\text{C}$  NMR (100 MHz,  $\text{CDCl}_3$ )  $\delta$  147.21, 143.39, 132.80, 129.07, 128.92, 128.08, 125.40, 119.58, 113.22, 83.38, 73.80, 46.51, 27.63, 24.90, 24.88. HRMS (ESI): Exact Mass Calcd. for  $\text{C}_{23}\text{H}_{30}\text{BN}_2\text{O}_3$  ( $\text{M}+\text{H}$ ): 393.2348, Found: 393.2353. HPLC (OD–H,  $n$ -hexane/ $i$ -PrOH = 99/1, flow rate = 1.0 mL/min,  $\lambda = 254$  nm)  $t_R = 7.263$  min (minor), 11.591 min (major).

## 5. Scale-up synthesis of compound 2a

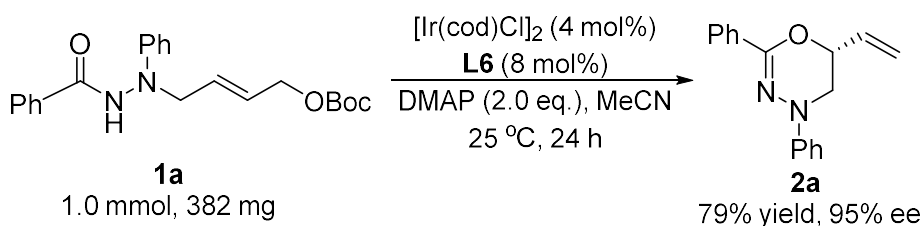

To a 50 mL Schlenk tube equipped with a magnetic stir bar was added  $[\text{Ir(COD)Cl}]_2$  (27 mg, 0.04 mmol, 4 mol %), phosphoramidite ligand **L6** (36 mg, 0.08 mmol, 8 mol %). The flask was sealed, evacuated, and backfilled with argon three times using standard Schlenk techniques. THF (5 mL) and  $n$ -propylamine (5 mL) was added at 25  $^\circ\text{C}$  and the reaction mixture was warmed to 50  $^\circ\text{C}$  for 0.5 h. The solvent was removed under reduced pressure to give a pale-yellow solid and DMAP (244 mg, 2 mmol, 2 equiv.), a solution of **1a** (1 mmol) in MeCN (20 mL) were then added. The resulting solution was stirred for 24 h at 25  $^\circ\text{C}$ . Upon completion of the reaction (monitored by TLC), the reaction

mixture was passed through a short pad of celite and washed with ethyl acetate (10 mL×3). The solvent was removed under reduced pressure and the residue was purified by flash column chromatography on silica gel to afford the product **2a**.

**Table 1. Crystal data and structure refinement for compound 2a**

|                                             |                                                               |
|---------------------------------------------|---------------------------------------------------------------|
| Identification code                         | lixiy_0320_auto                                               |
| Empirical formula                           | C <sub>17</sub> H <sub>15</sub> N <sub>2</sub> O              |
| Formula weight                              | 263.31                                                        |
| Temperature/K                               | 300.61(10)                                                    |
| Crystal system                              | orthorhombic                                                  |
| Space group                                 | P2 <sub>1</sub> 2 <sub>1</sub> 2 <sub>1</sub>                 |
| a/Å                                         | 8.6196(3)                                                     |
| b/Å                                         | 10.1794(2)                                                    |
| c/Å                                         | 16.4222(5)                                                    |
| α/°                                         | 90                                                            |
| β/°                                         | 90                                                            |
| γ/°                                         | 90                                                            |
| Volume/Å <sup>3</sup>                       | 1440.92(7)                                                    |
| Z                                           | 4                                                             |
| ρ <sub>calc</sub> /cm <sup>3</sup>          | 1.214                                                         |
| μ/mm <sup>-1</sup>                          | 0.607                                                         |
| F(000)                                      | 556.0                                                         |
| Crystal size/mm <sup>3</sup>                | 0.19 × 0.18 × 0.12                                            |
| Radiation                                   | Cu Kα (λ = 1.54184)                                           |
| 2θ range for data collection/°              | 10.224 to 152.592                                             |
| Index ranges                                | -10 ≤ h ≤ 10, -12 ≤ k ≤ 7, -20 ≤ l ≤ 20                       |
| Reflections collected                       | 7439                                                          |
| Independent reflections                     | 2816 [R <sub>int</sub> = 0.0292, R <sub>sigma</sub> = 0.0345] |
| Data/restraints/parameters                  | 2816/2/190                                                    |
| Goodness-of-fit on F <sup>2</sup>           | 1.046                                                         |
| Final R indexes [I ≥ 2σ (I)]                | R <sub>1</sub> = 0.0379, wR <sub>2</sub> = 0.1051             |
| Final R indexes [all data]                  | R <sub>1</sub> = 0.0427, wR <sub>2</sub> = 0.1092             |
| Largest diff. peak/hole / e Å <sup>-3</sup> | 0.18/-0.12                                                    |
| Flack parameter                             | 0.09(16)                                                      |

## 6. References

- [1] F. Zhan, G. Liang, *Angew. Chem., Int. Ed.* **2013**, 52, 1266–1269.
- [2] J. S. Derasp, E. A. Barbera, N. R. Séguin, D. D. Brzezinski, A. M. Beauchemin, *Org. Lett.* **2020**, 22, 7403–7407.

## 7. NMR spectra of compounds 2a–2x, 4a–4e and 5–7

<sup>1</sup>H NMR spectrum of compound **2a** (CDCl<sub>3</sub>, 400 MHz)

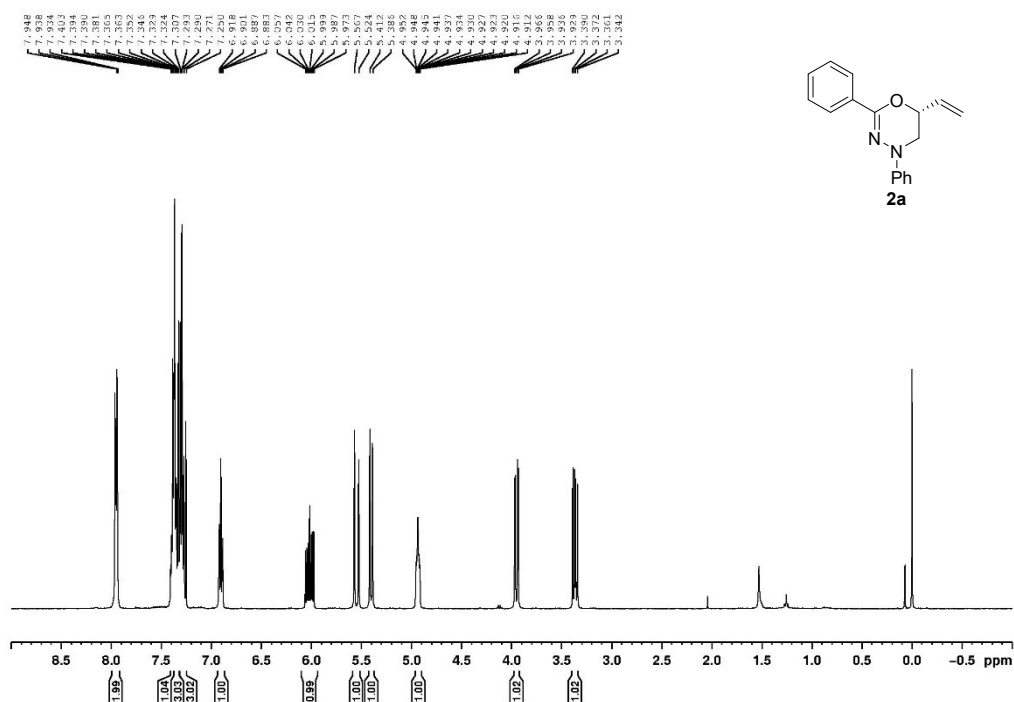

$^1\text{H}$  NMR spectrum of compound **2b** ( $\text{CDCl}_3$ , 400 MHz)

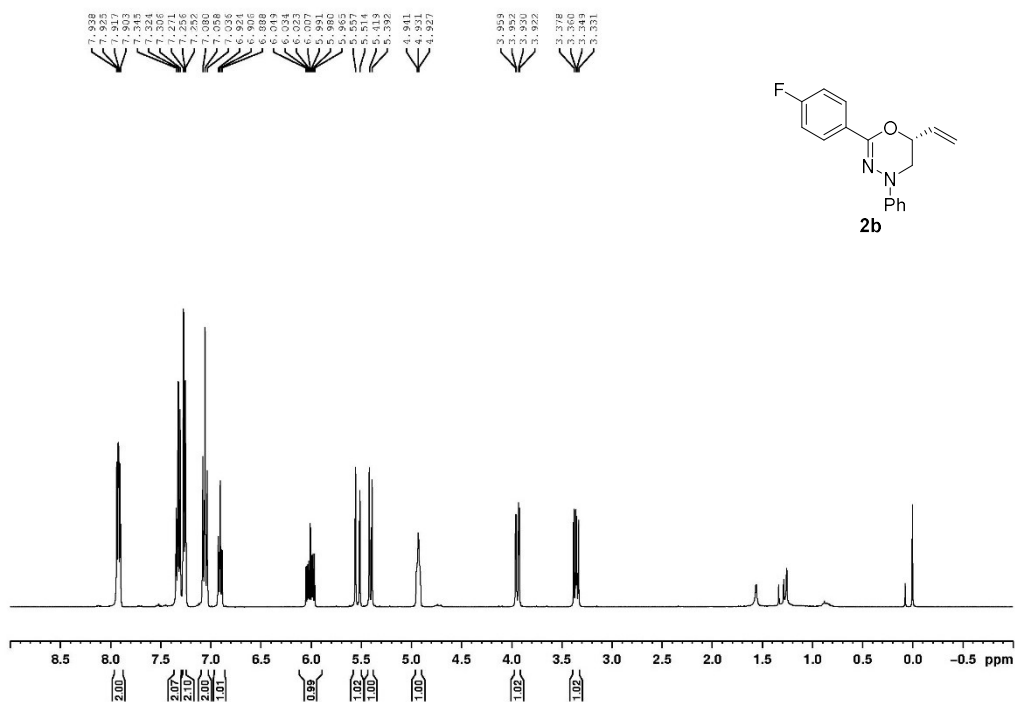

$^{13}\text{C}$  NMR spectrum of compound **2b** ( $\text{CDCl}_3$ , 100 MHz)

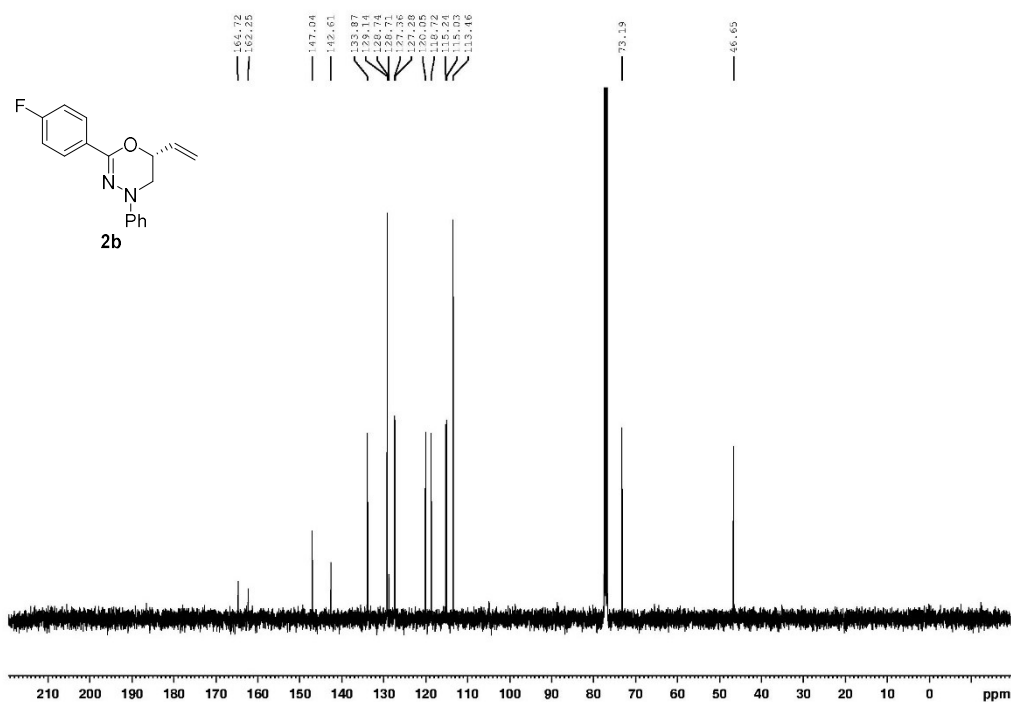



$^{19}\text{F}$  NMR spectrum of compound **2b** ( $\text{CDCl}_3$ , 376 MHz)

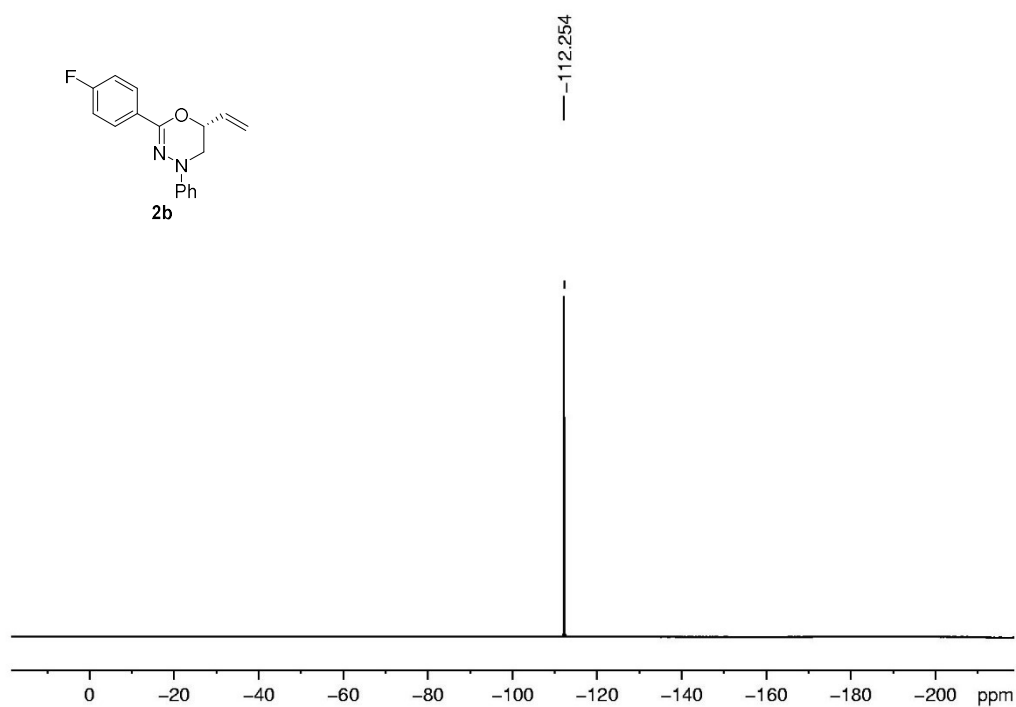

$^1\text{H}$  NMR spectrum of compound **2c** ( $\text{CDCl}_3$ , 400 MHz)

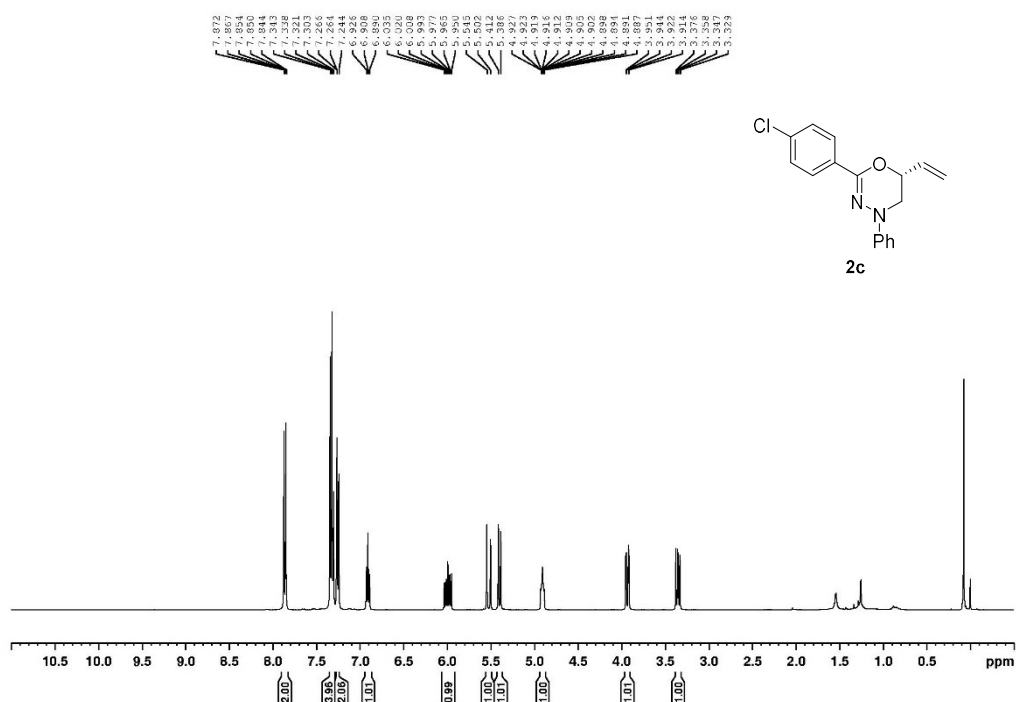

$^{13}\text{C}$  NMR spectrum of compound **2c** ( $\text{CDCl}_3$ , 100 MHz)

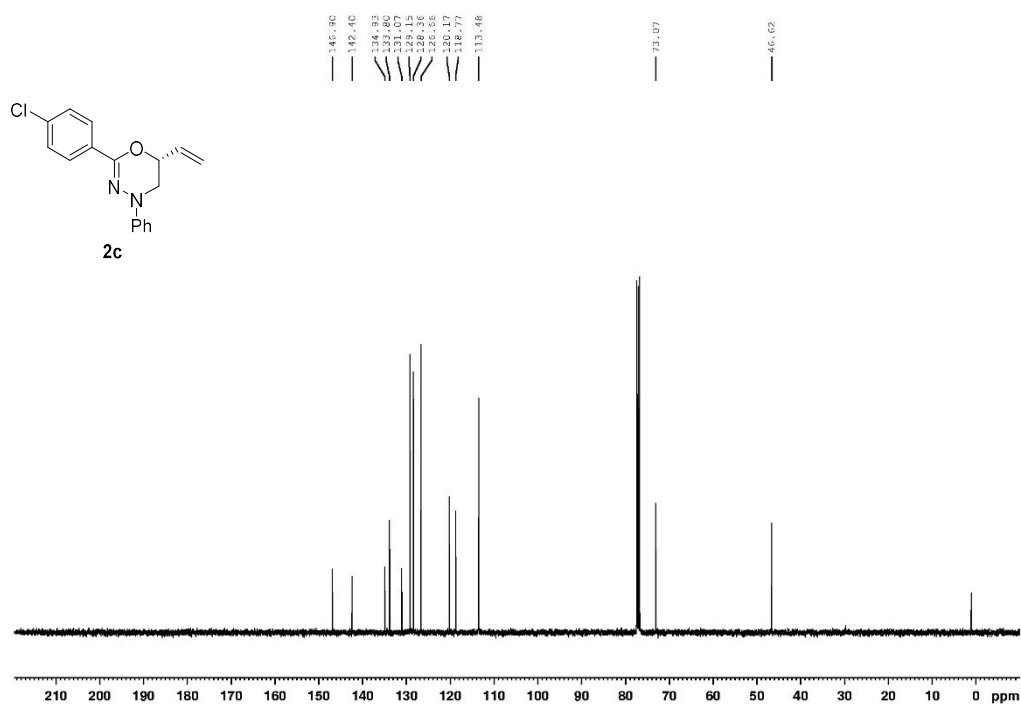

$^1\text{H}$  NMR spectrum of compound **2d** ( $\text{CDCl}_3$ , 400 MHz)

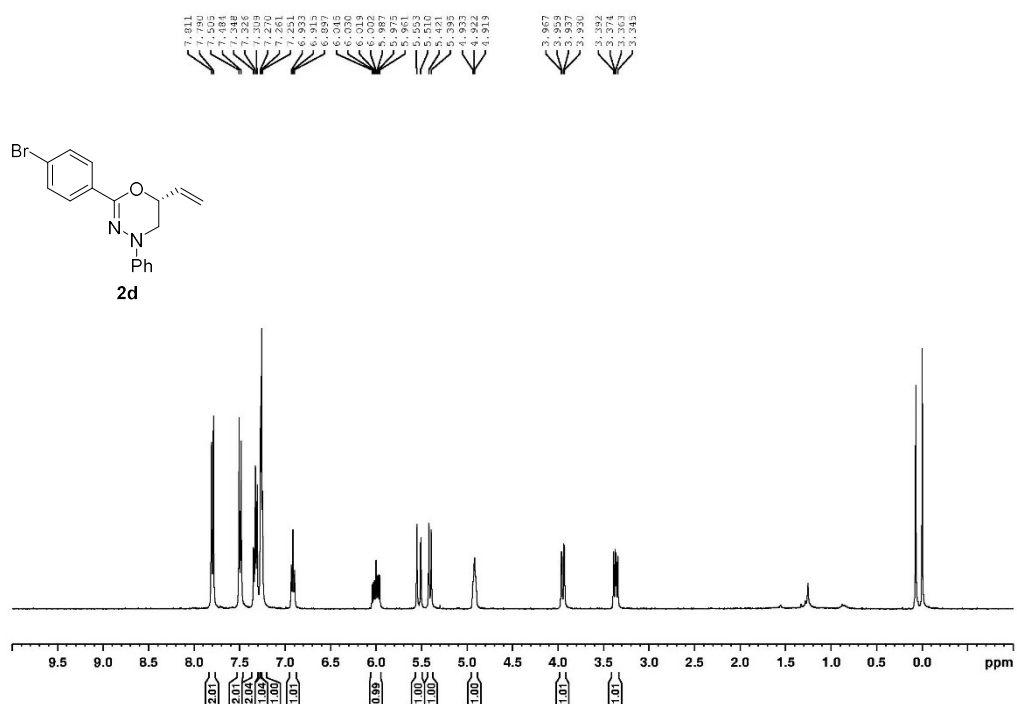

$^{13}\text{C}$  NMR spectrum of compound **2d** ( $\text{CDCl}_3$ , 100 MHz)

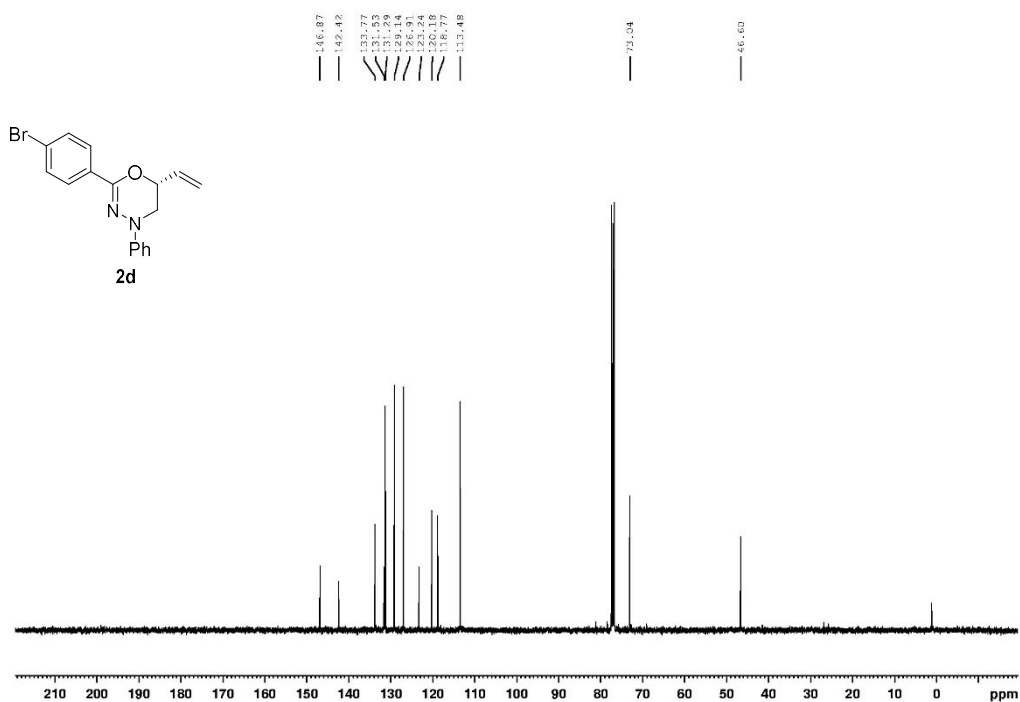

$^1\text{H}$  NMR spectrum of compound **2e** ( $\text{CDCl}_3$ , 400 MHz)

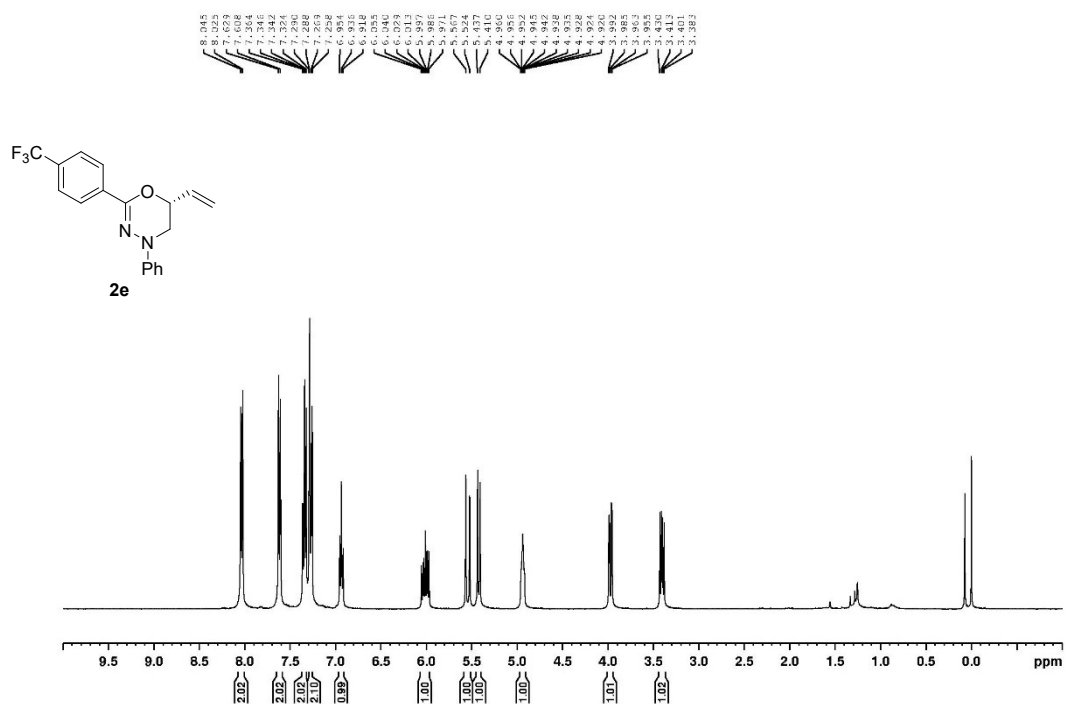

**2e**

C=C[C@H]1CN(C2=CC=CC=C2)N=C(c3ccc(C(F)(F)F)cc3)O1

145.70  
141.90  
139.92  
139.66  
130.77  
130.43  
129.20  
128.88  
125.18  
122.13  
120.00  
119.00  
117.57  
73.01  
46.62

ppm

**2e**

Chemical structure of **2e** is shown in the top left corner. The structure is a 4-(trifluoromethyl)-2-phenyl-2-methyl-1,3-dioxane derivative, specifically 4-(trifluoromethyl)-2-phenyl-2-methyl-1,3-dioxane, with the trifluoromethyl group at the para position of the phenyl ring.

$^{13}\text{C}$  NMR spectrum (ppm) showing a single peak at  $-62.543$ .

$^1\text{H}$  NMR spectrum of compound **2f** ( $\text{CDCl}_3$ , 400 MHz)

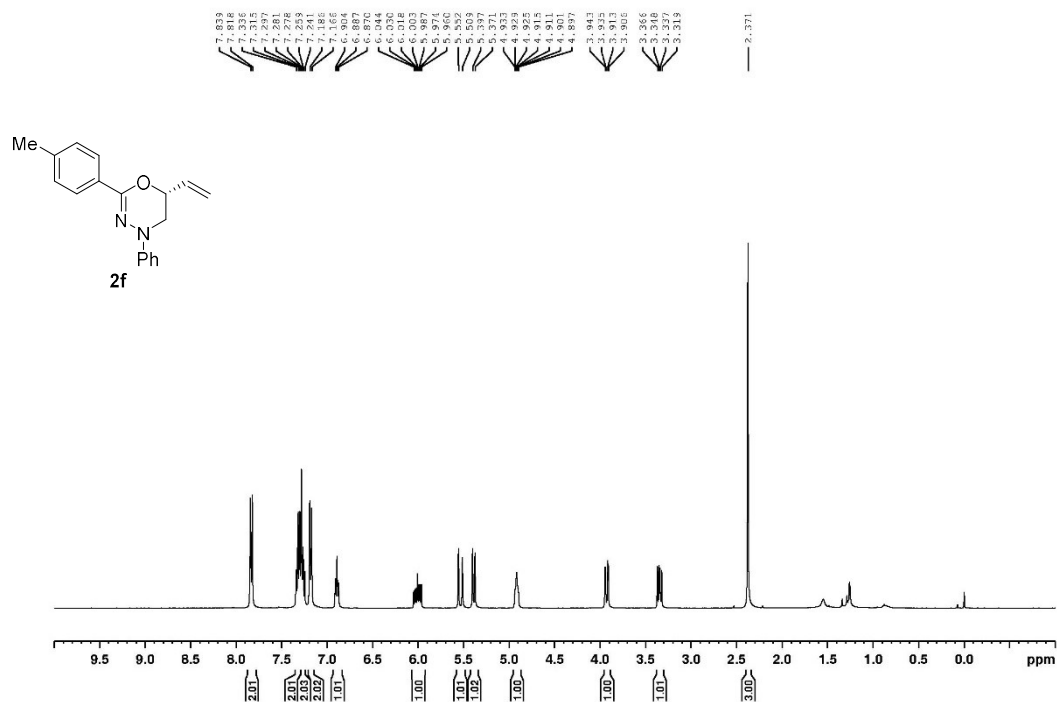

$^{13}\text{C}$  NMR spectrum of compound **2f** ( $\text{CDCl}_3$ , 100 MHz)

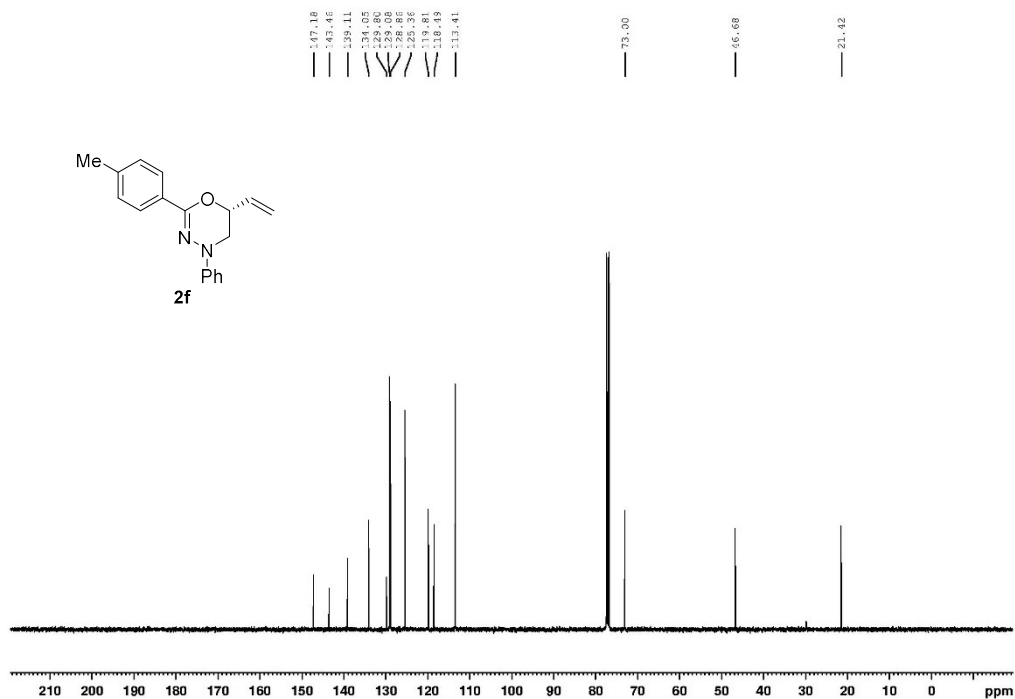

$^1\text{H}$  NMR spectrum of compound **2g** ( $\text{CDCl}_3$ , 400 MHz)

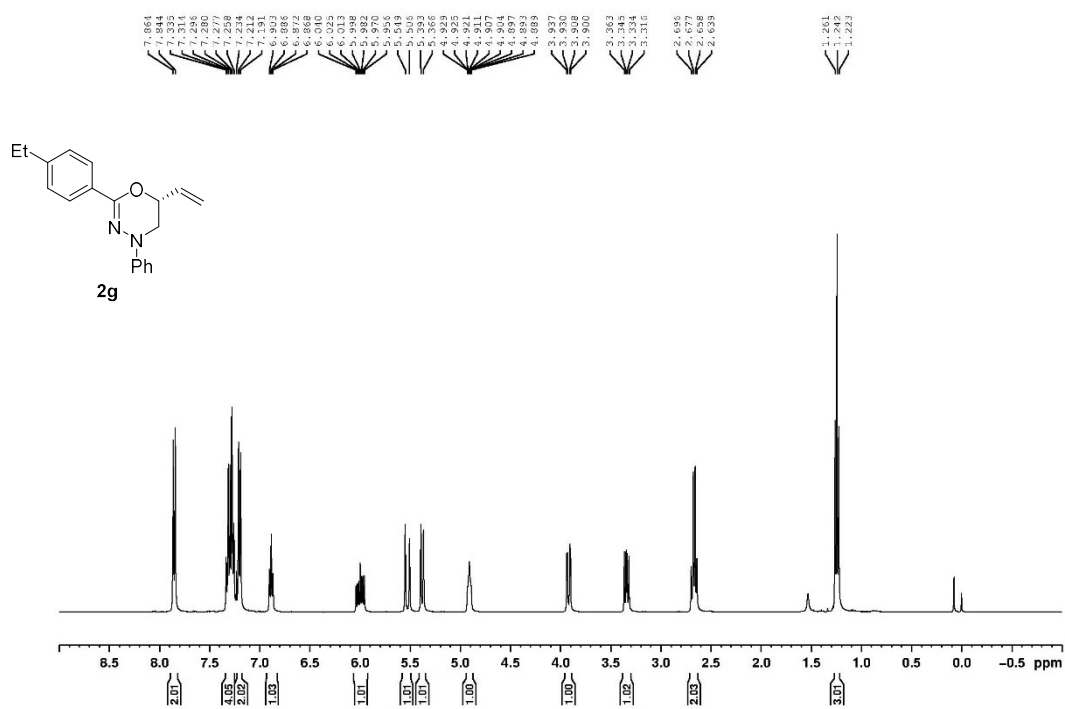

$^{13}\text{C}$  NMR spectrum of compound **2g** ( $\text{CDCl}_3$ , 100 MHz)

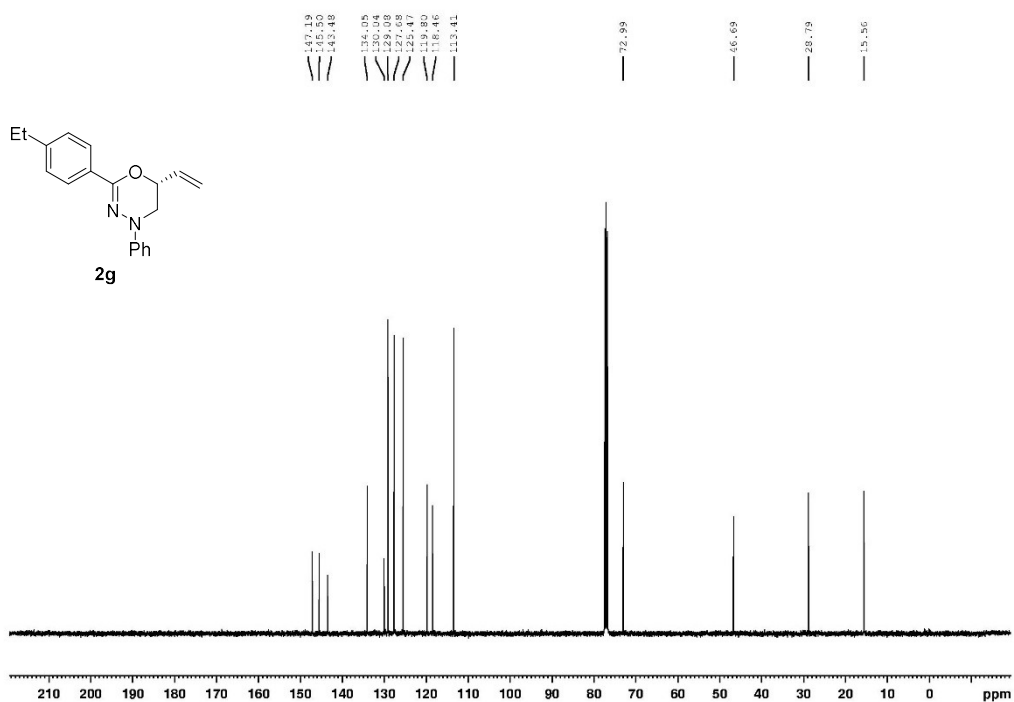

<sup>1</sup>H NMR spectrum of compound **2h** (CDCl<sub>3</sub>, 400 MHz)

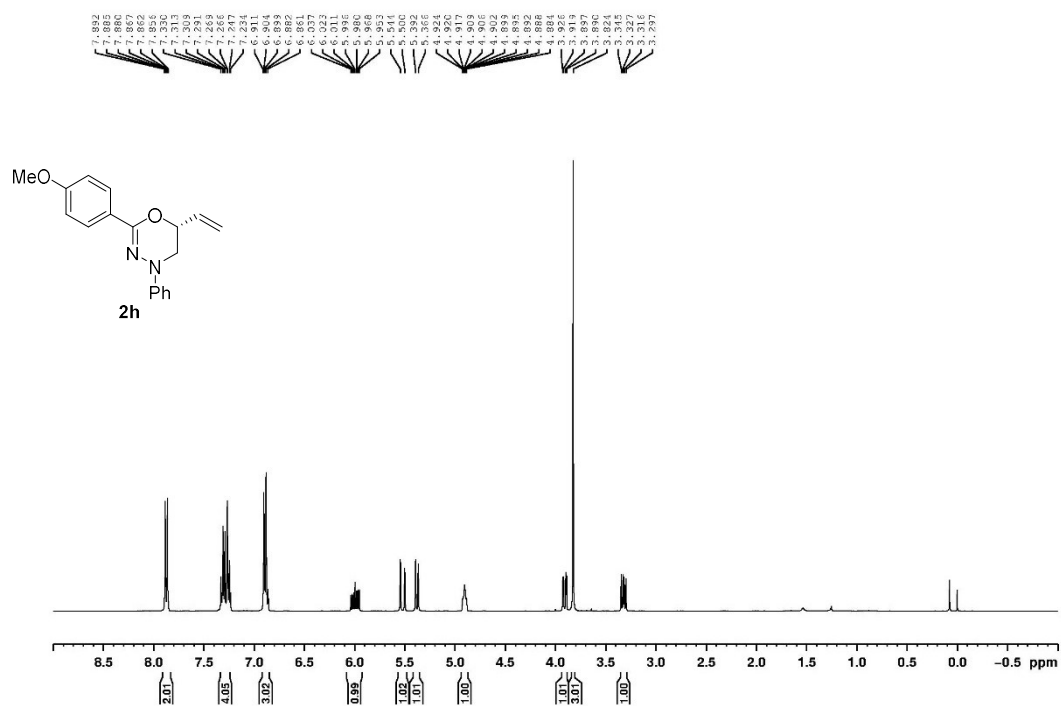

<sup>13</sup>C NMR spectrum of compound **2h** (CDCl<sub>3</sub>, 100 MHz)

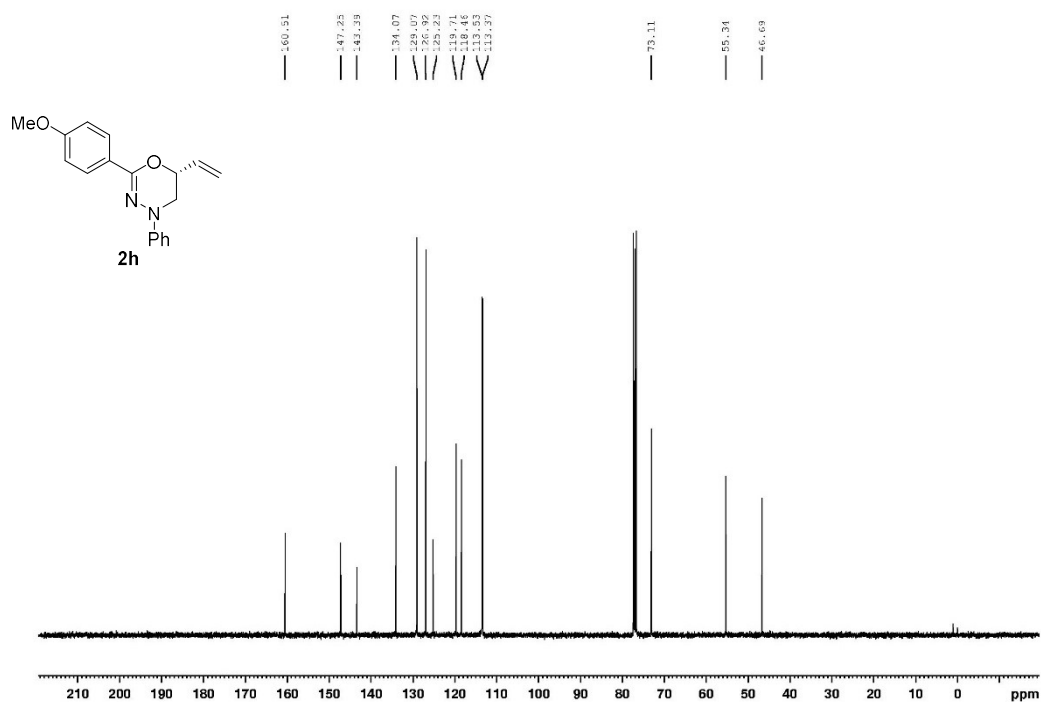

$^1\text{H}$  NMR spectrum of compound **2i** ( $\text{CDCl}_3$ , 400 MHz)

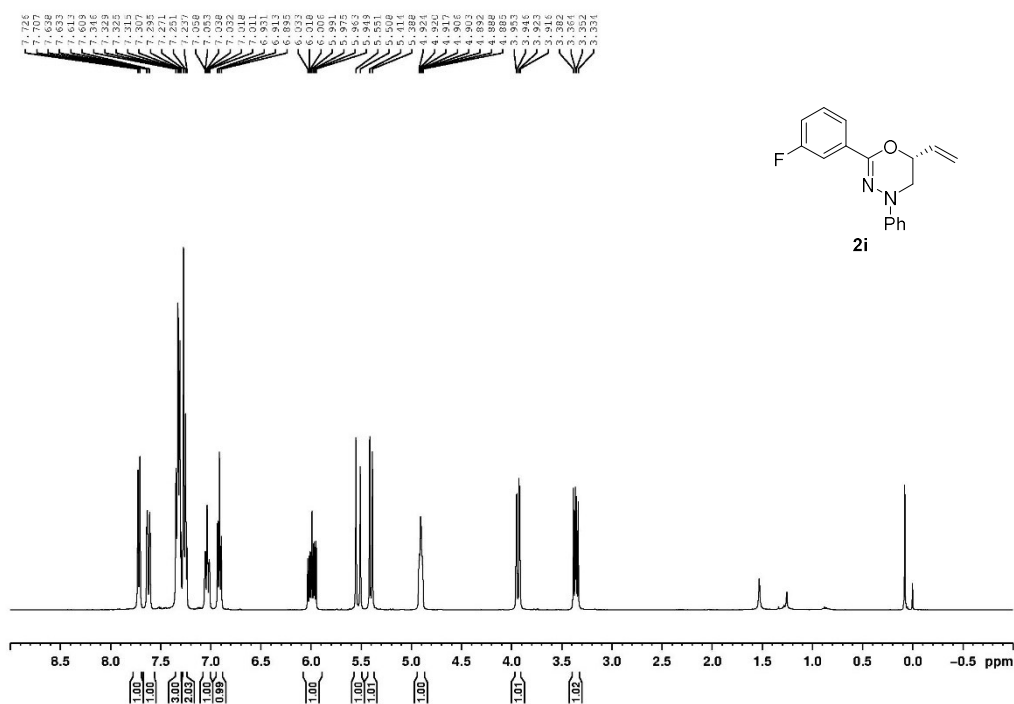

$^{13}\text{C}$  NMR spectrum of compound **2i** ( $\text{CDCl}_3$ , 100 MHz)

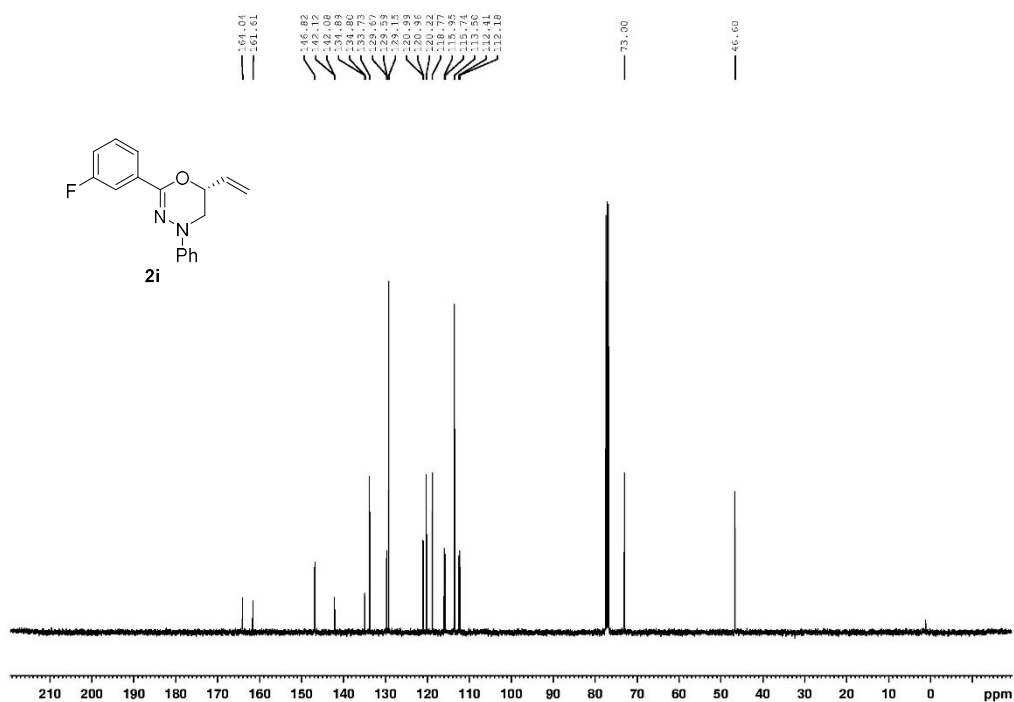



<sup>19</sup>F NMR spectrum of compound **2i** (CDCl<sub>3</sub>, 376 MHz)

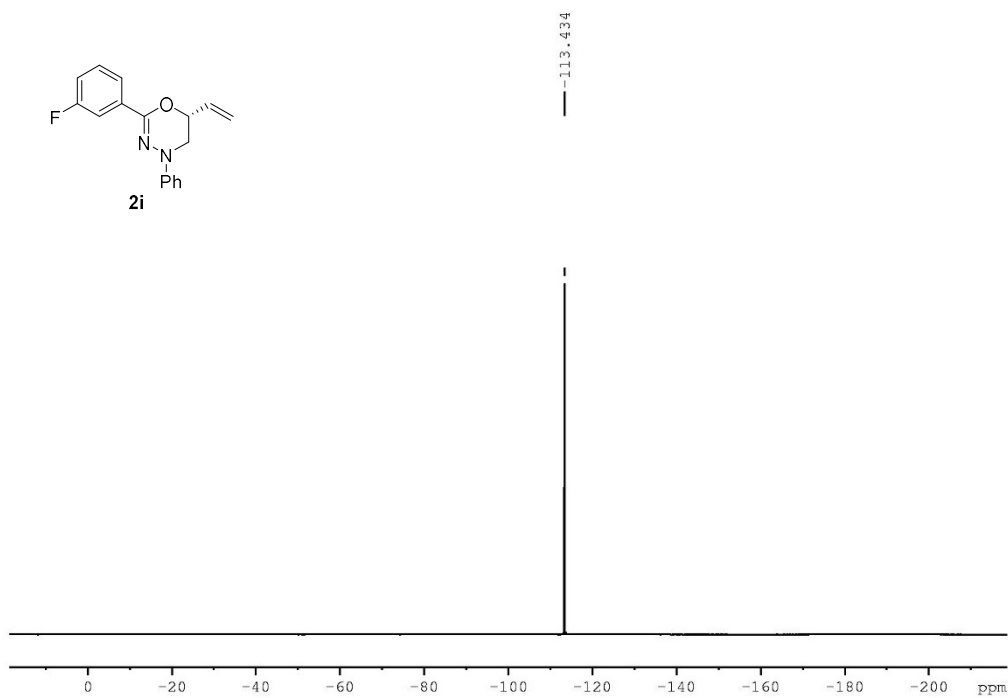<sup>1</sup>H NMR spectrum of compound **2j** (CDCl<sub>3</sub>, 400 MHz)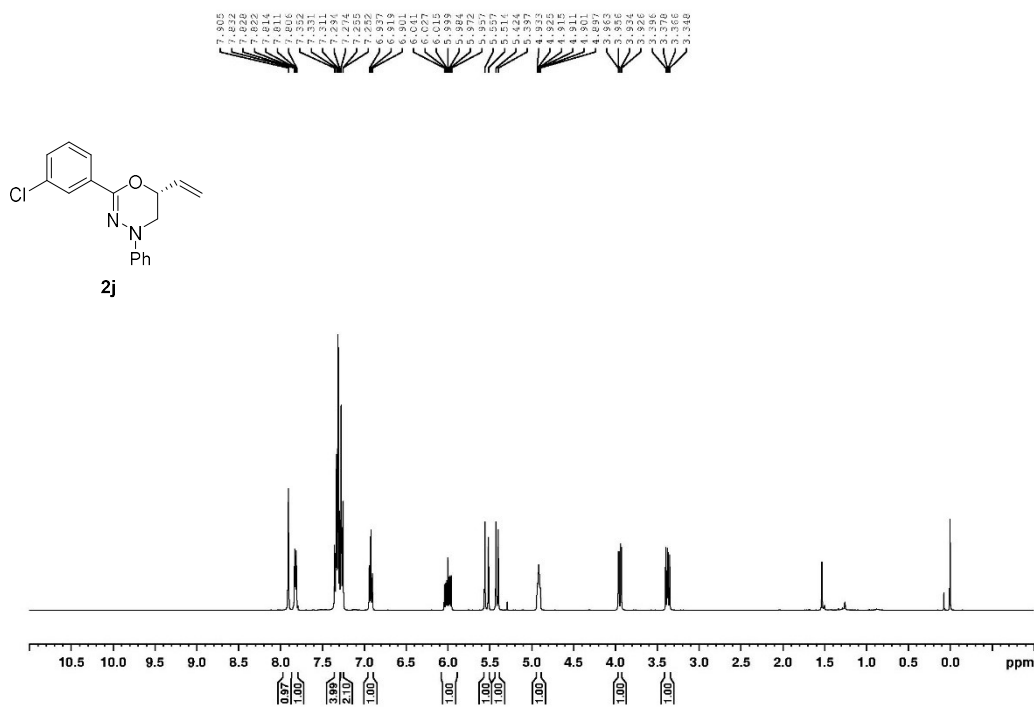

<sup>13</sup>C NMR spectrum of compound **2j** (CDCl<sub>3</sub>, 100 MHz)

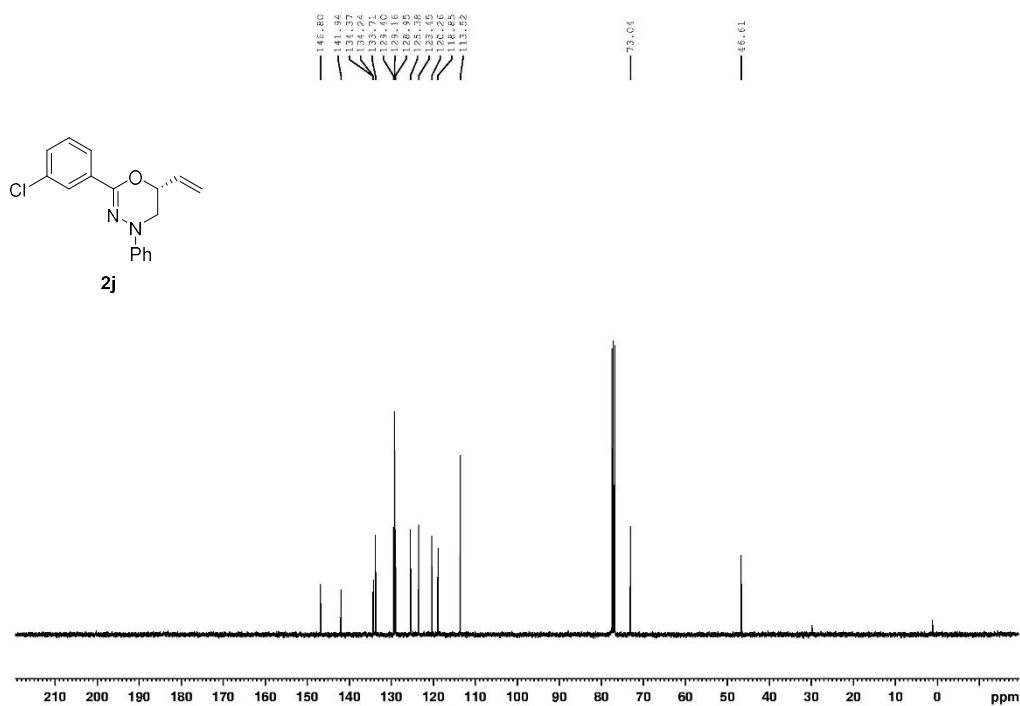

<sup>1</sup>H NMR spectrum of compound **2k** (CDCl<sub>3</sub>, 400 MHz)

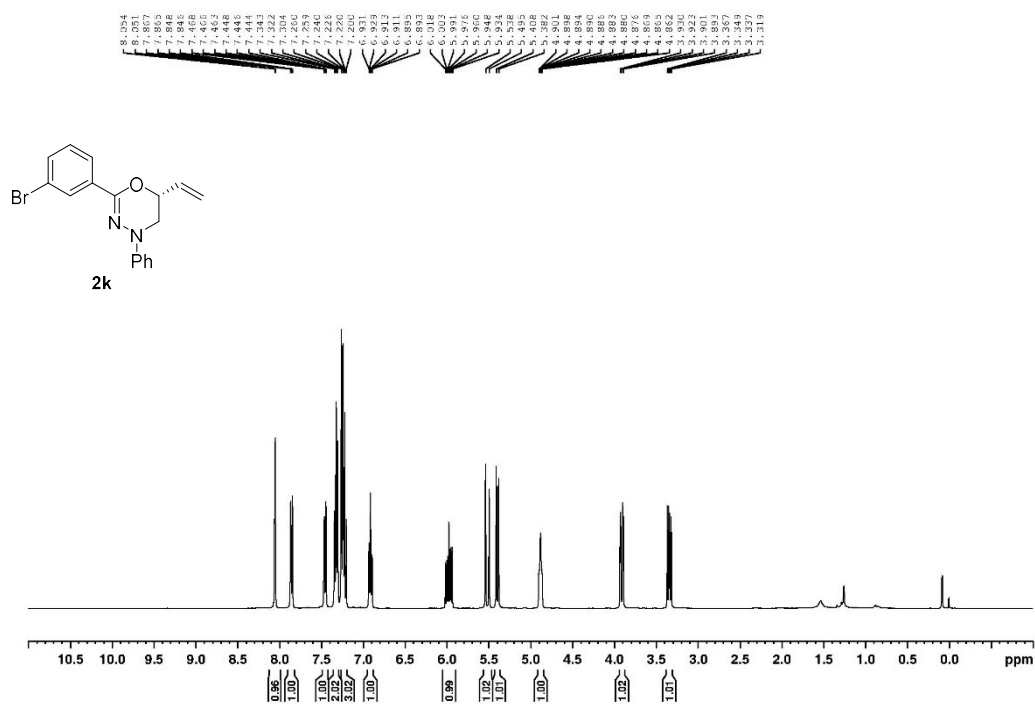

$^{13}\text{C}$  NMR spectrum of compound **2k** ( $\text{CDCl}_3$ , 100 MHz)

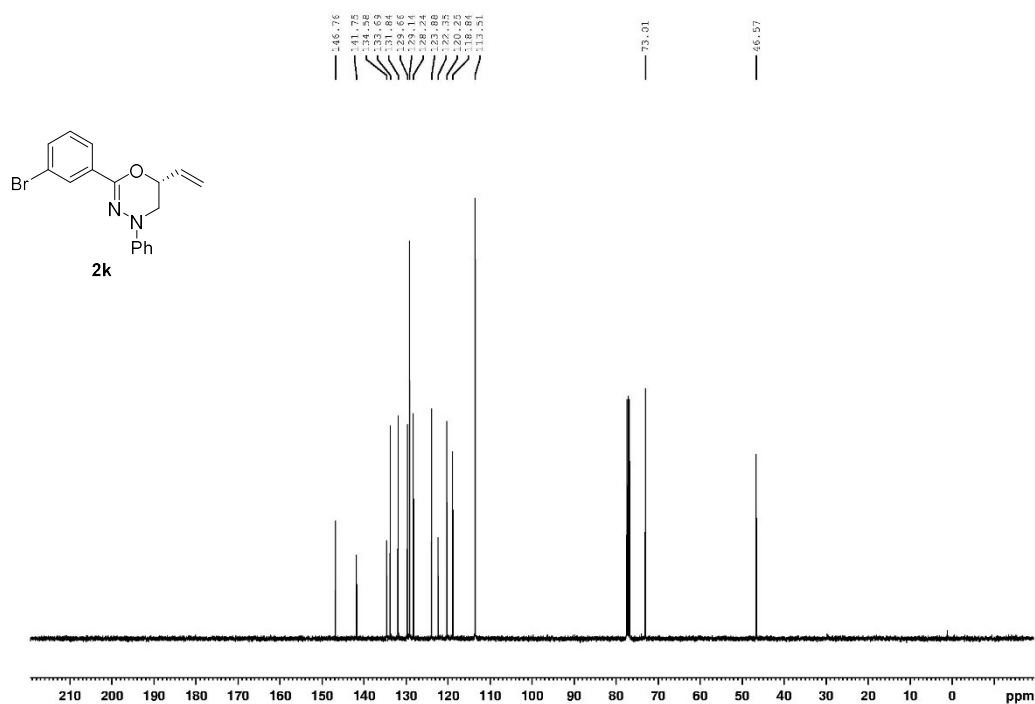

$^1\text{H}$  NMR spectrum of compound **2l** ( $\text{CDCl}_3$ , 400 MHz)

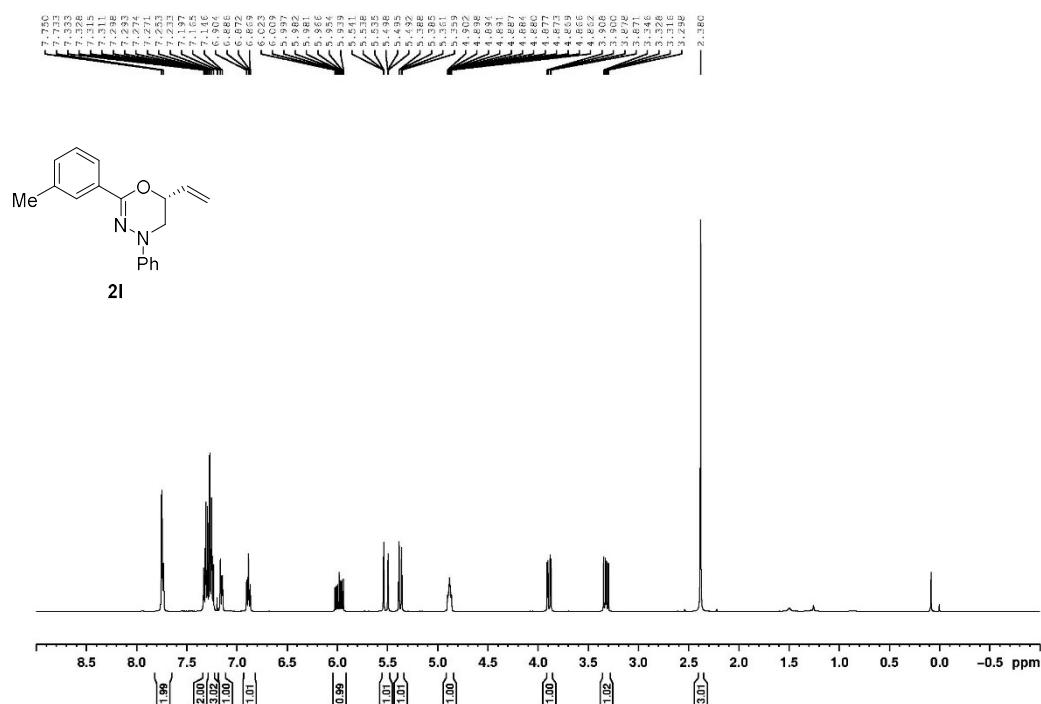

<sup>13</sup>C NMR spectrum of compound **21** (CDCl<sub>3</sub>, 100 MHz)

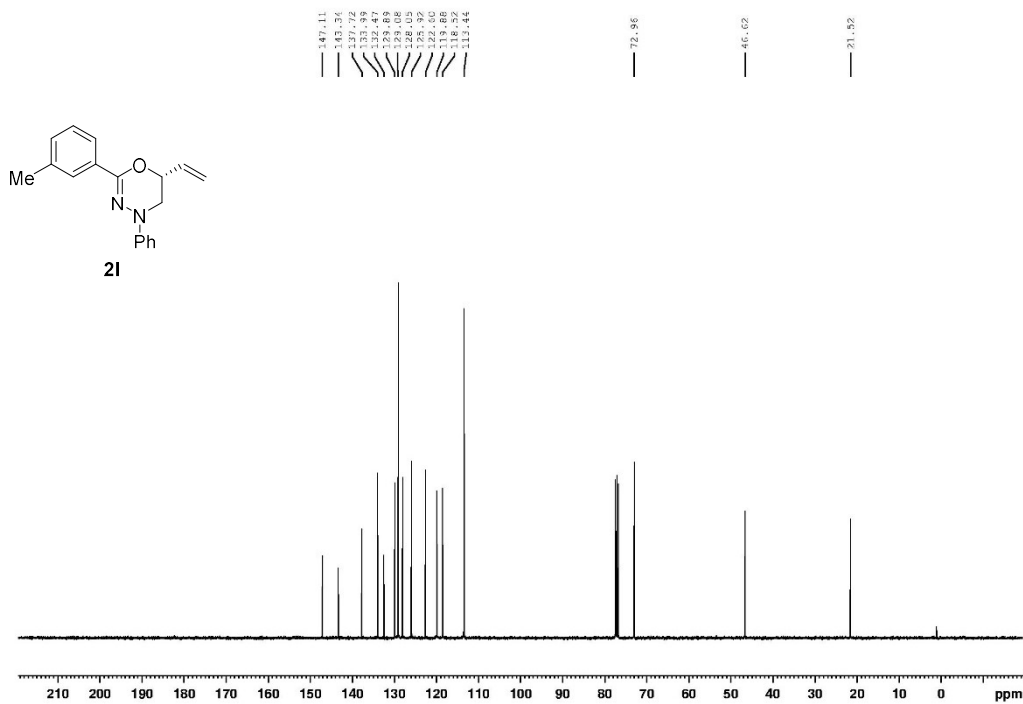

<sup>1</sup>H NMR spectrum of compound **2m** (CDCl<sub>3</sub>, 400 MHz)

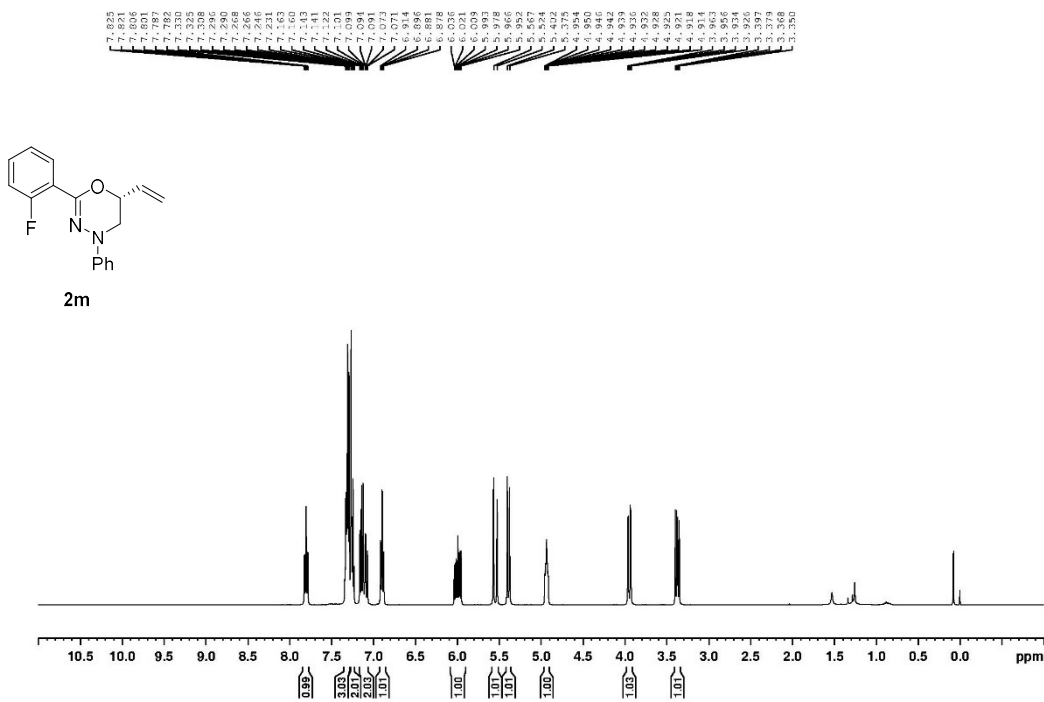

$^{13}\text{C}$  NMR spectrum of compound **2m** ( $\text{CDCl}_3$ , 100 MHz)

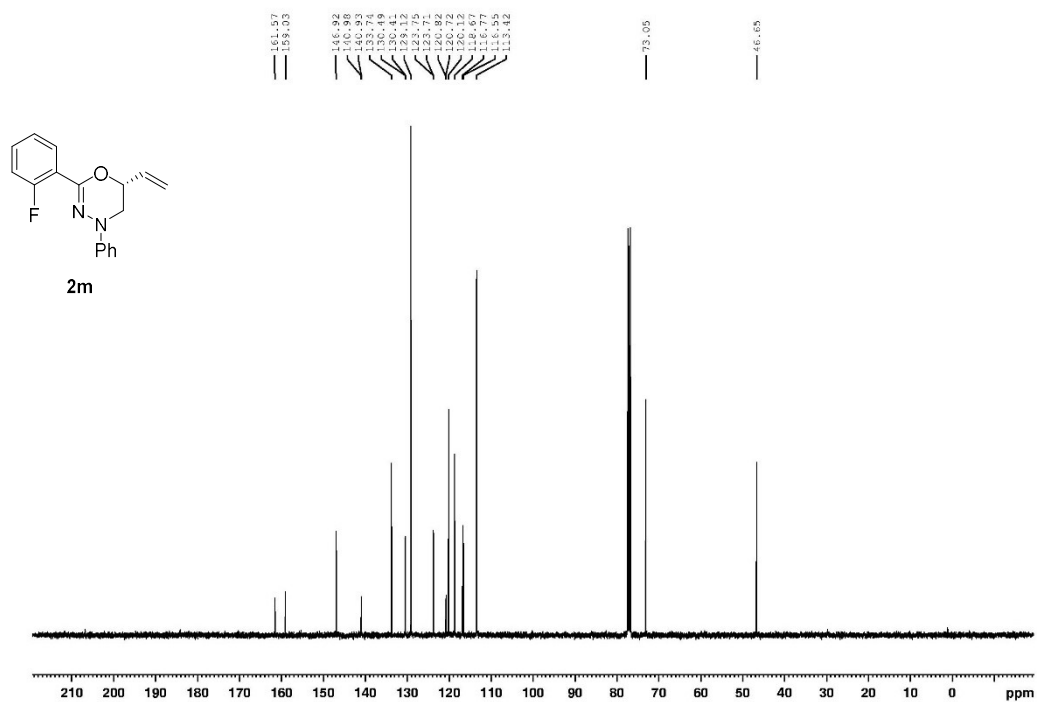

$^{19}\text{F}$  NMR spectrum of compound **2m** ( $\text{CDCl}_3$ , 376 MHz)

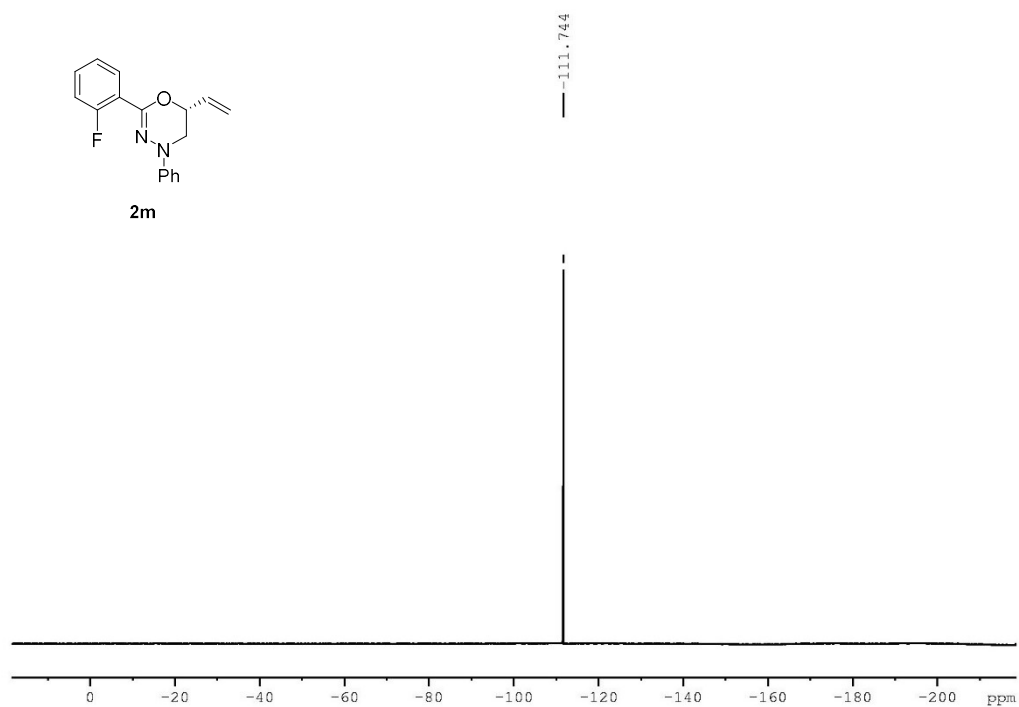

$^1\text{H}$  NMR spectrum of compound **2n** ( $\text{CDCl}_3$ , 400 MHz)

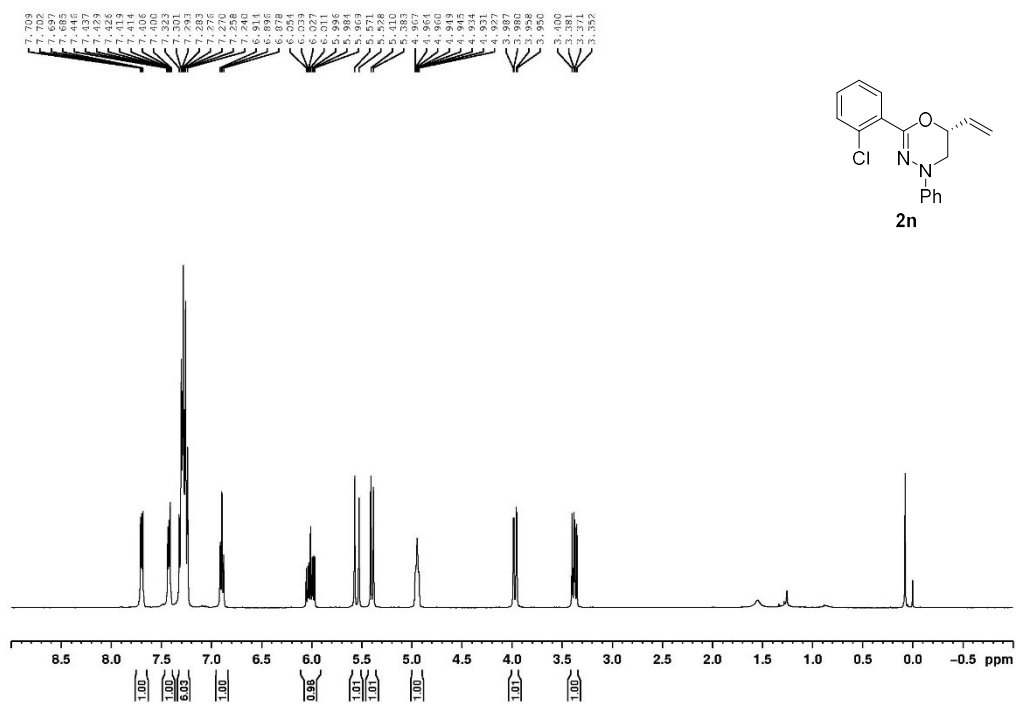

$^{13}\text{C}$  NMR spectrum of compound **2n** ( $\text{CDCl}_3$ , 100 MHz)

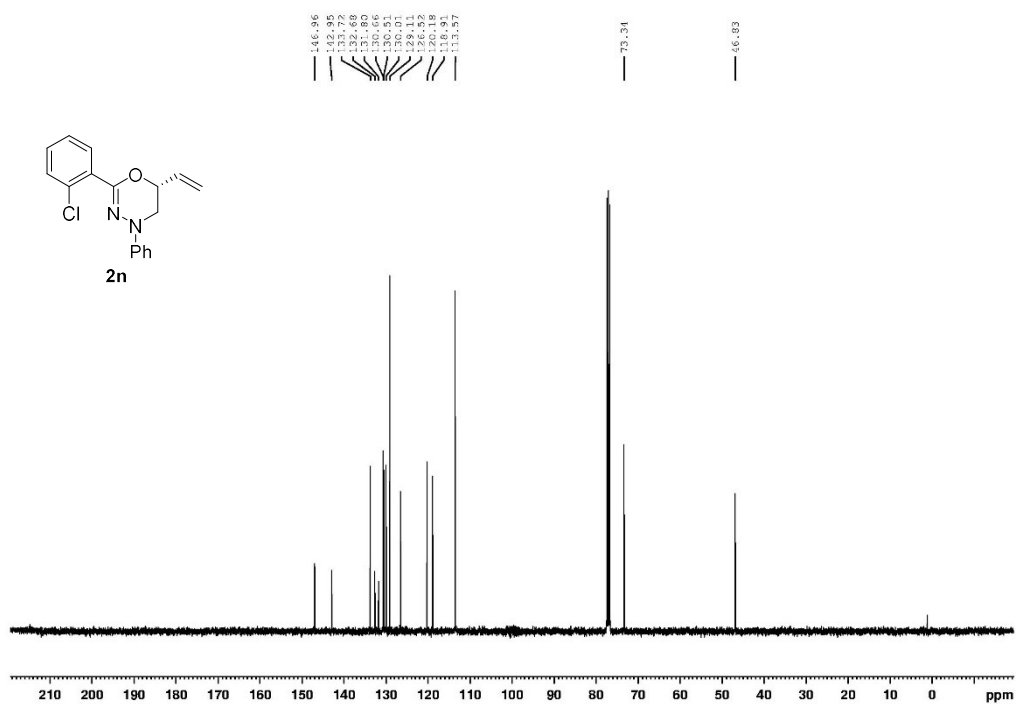

$^1\text{H}$  NMR spectrum of compound **2o** ( $\text{CDCl}_3$ , 400 MHz)

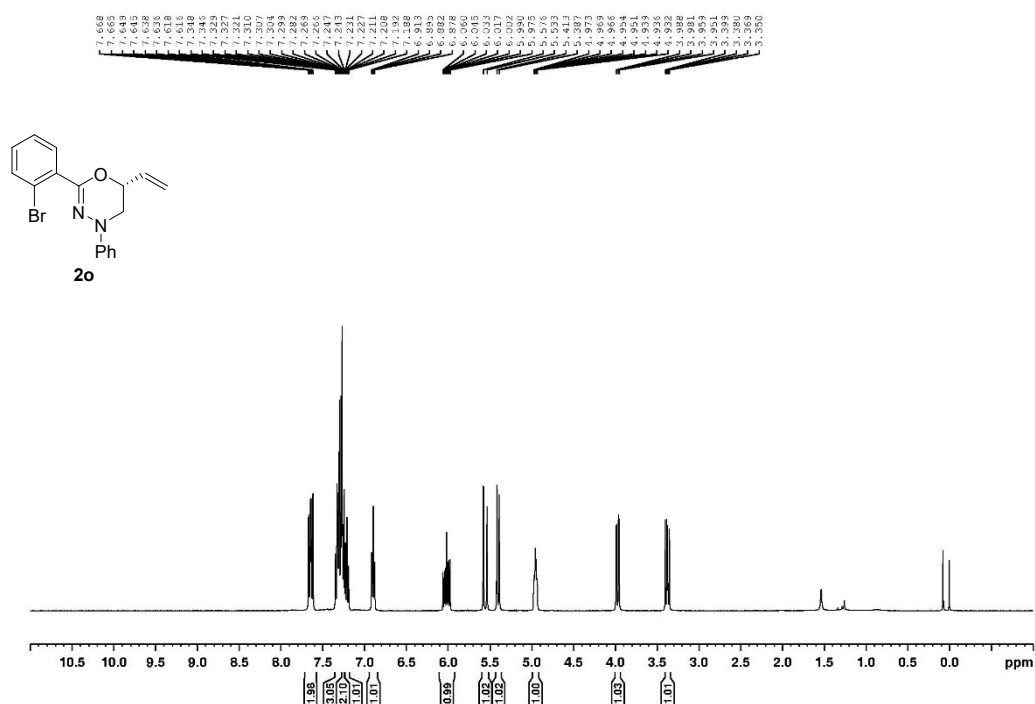

$^{13}\text{C}$  NMR spectrum of compound **2o** ( $\text{CDCl}_3$ , 100 MHz)

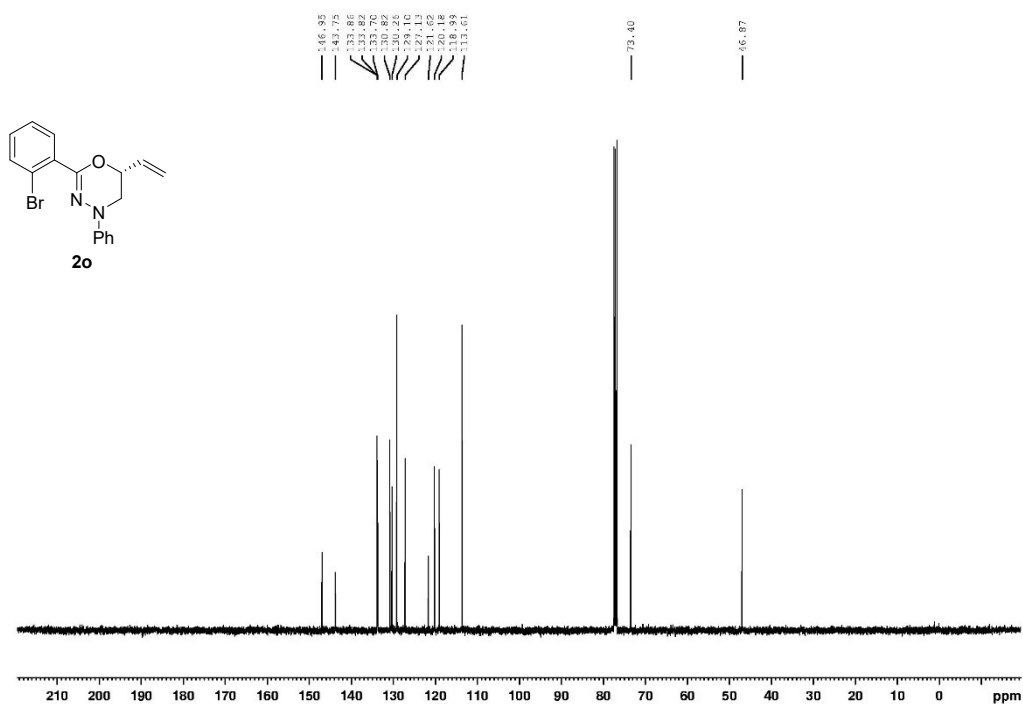

$^1\text{H}$  NMR spectrum of compound **2p** ( $\text{CDCl}_3$ , 400 MHz)

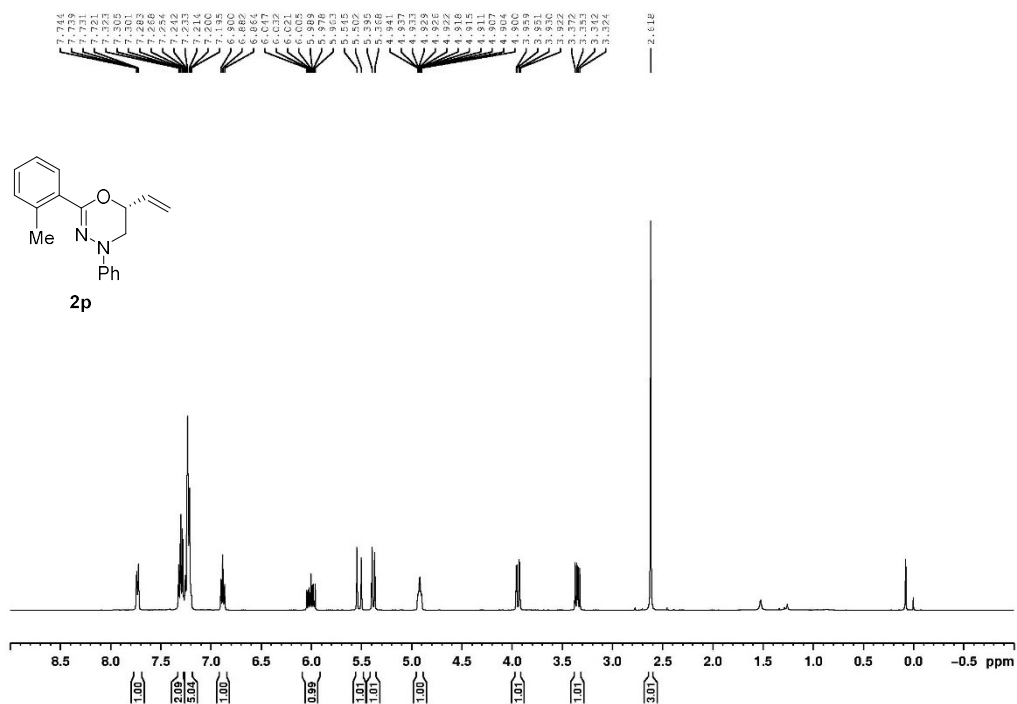

$^{13}\text{C}$  NMR spectrum of compound **2p** ( $\text{CDCl}_3$ , 100 MHz)

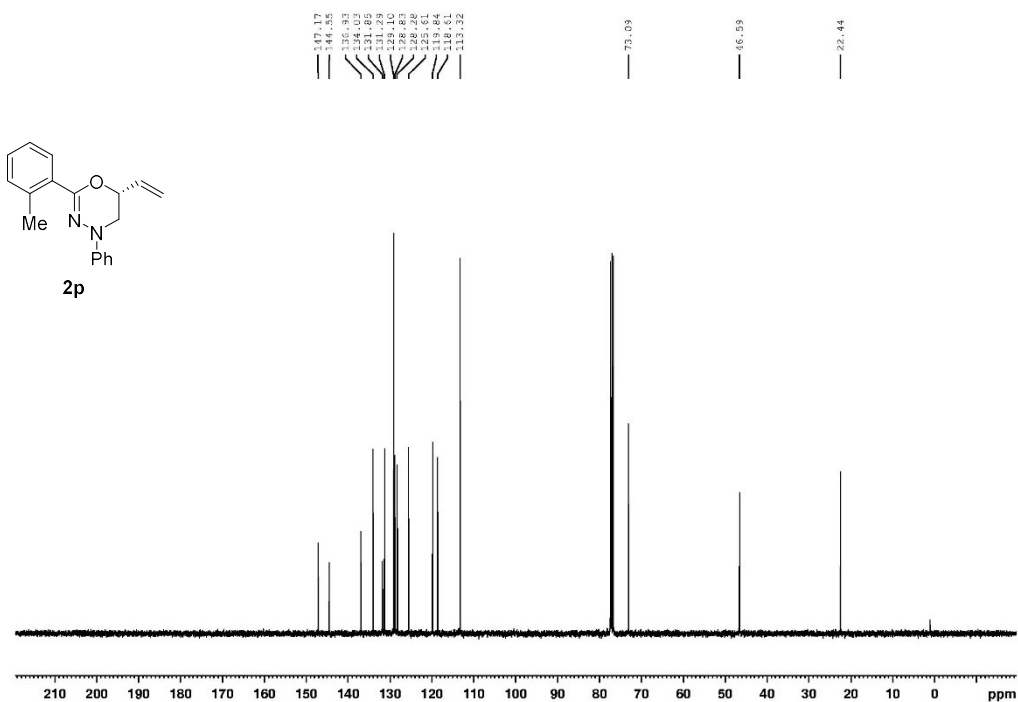



<sup>1</sup>H NMR spectrum of compound **2q** (CDCl<sub>3</sub>, 400 MHz)

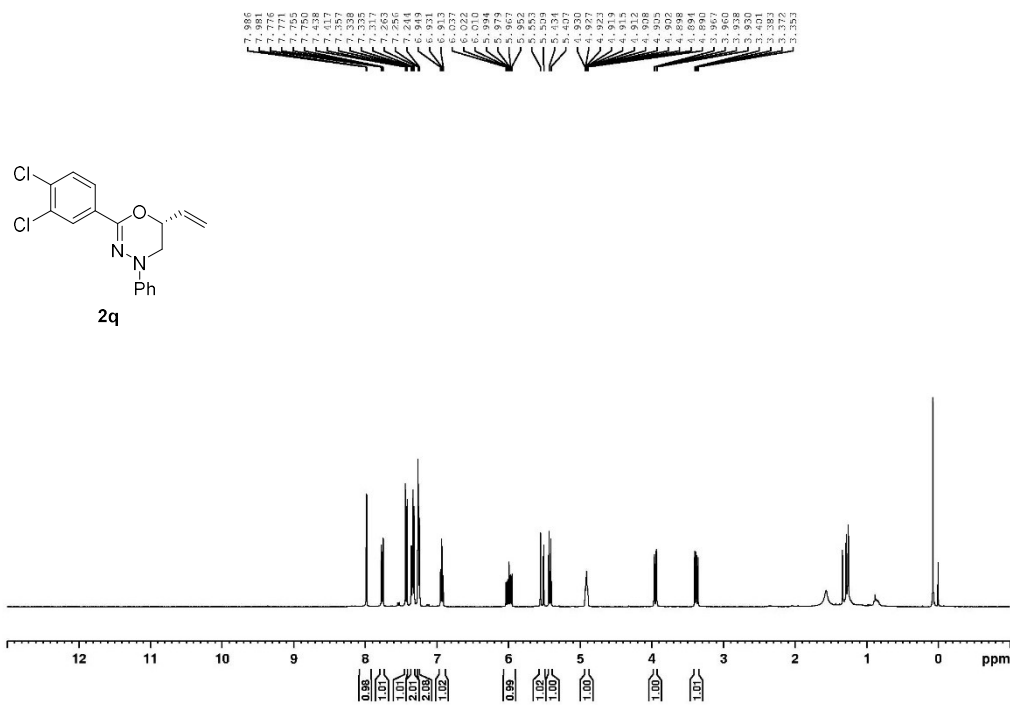

<sup>13</sup>C NMR spectrum of compound **2q** (CDCl<sub>3</sub>, 100 MHz)

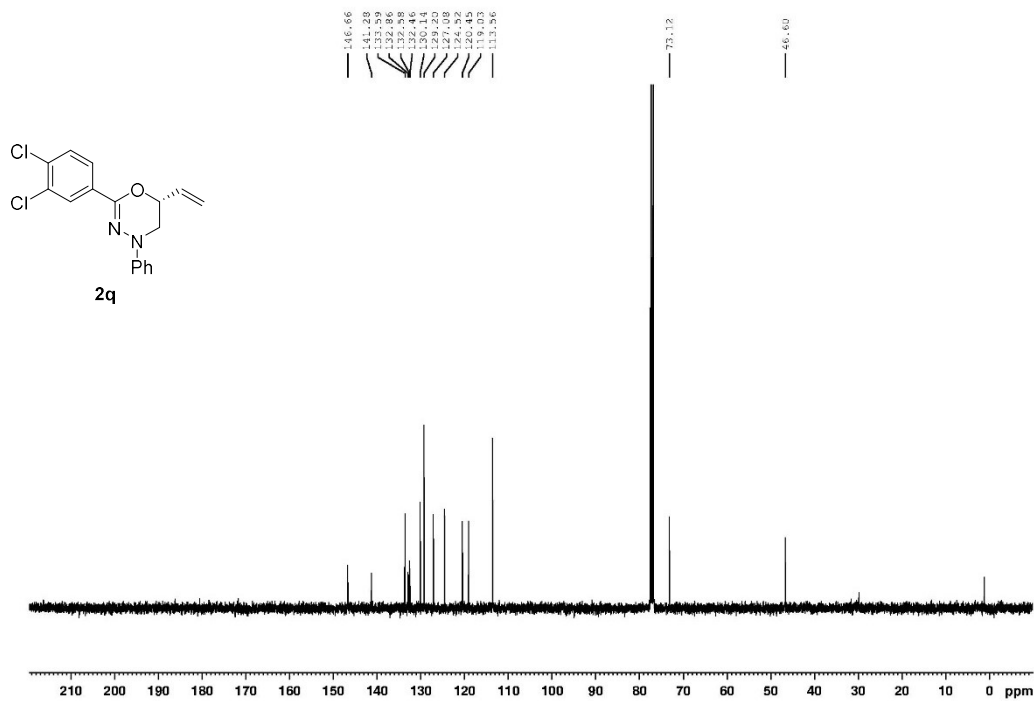

<sup>1</sup>H NMR spectrum of compound **2r** (CDCl<sub>3</sub>, 400 MHz)

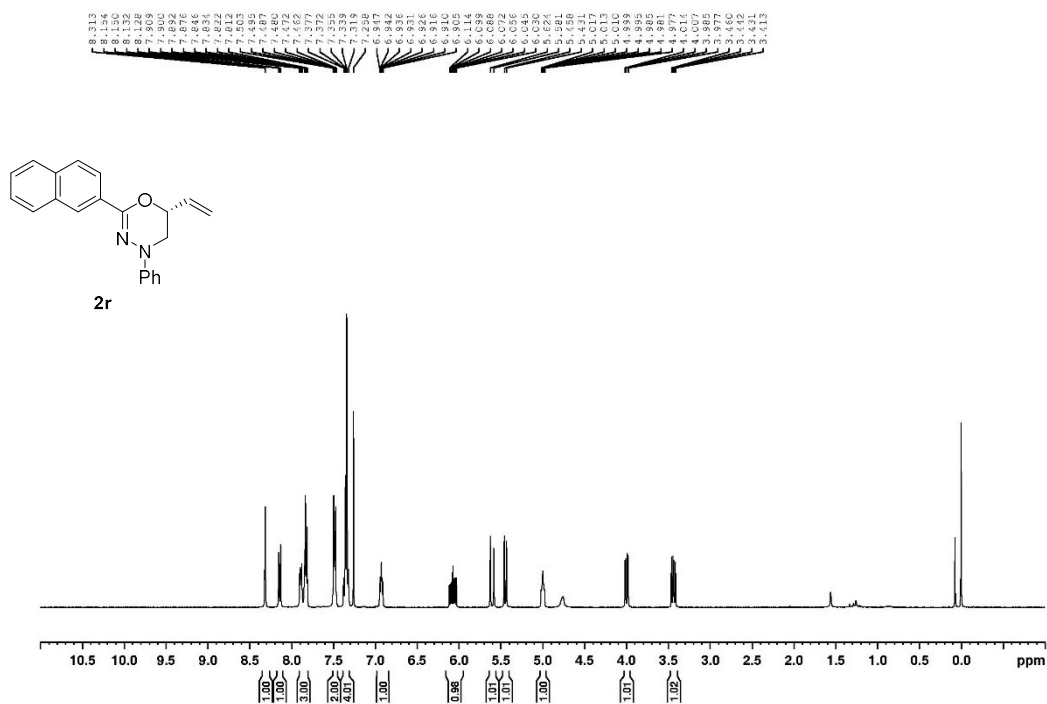

<sup>13</sup>C NMR spectrum of compound **2r** (CDCl<sub>3</sub>, 100 MHz)

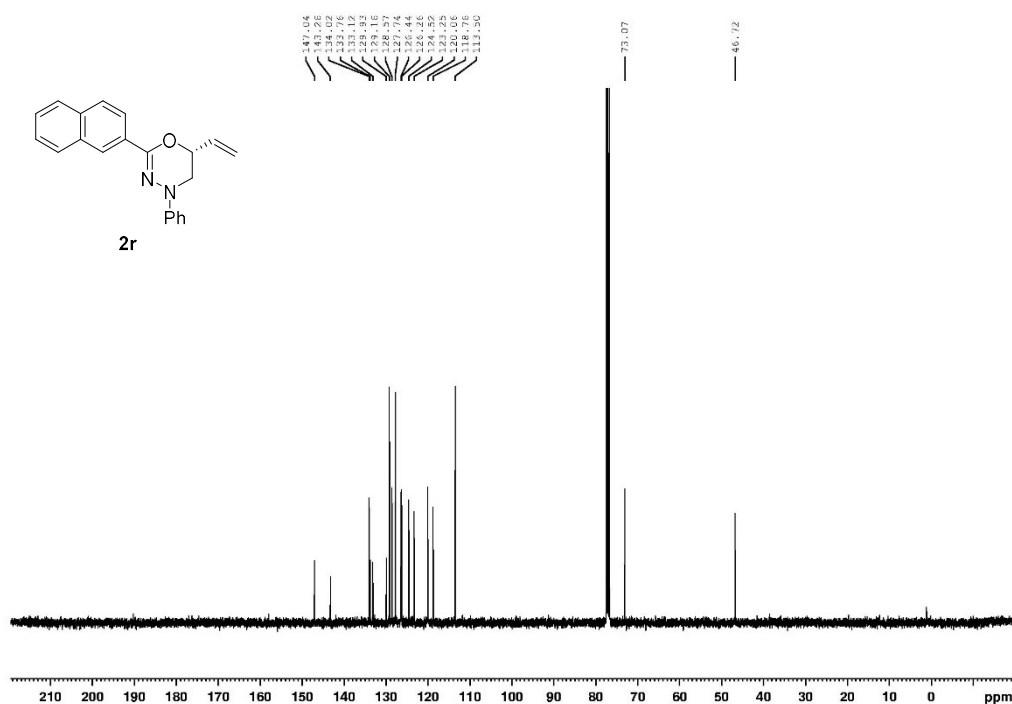

<sup>1</sup>H NMR spectrum of compound **2s** (CDCl<sub>3</sub>, 400 MHz)

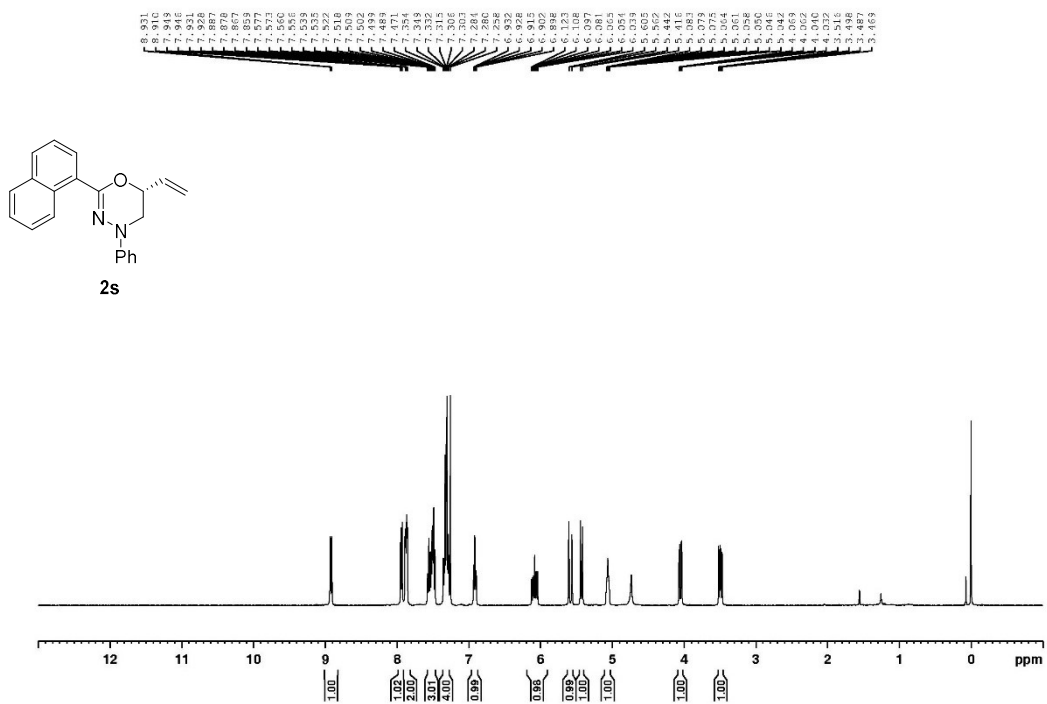

<sup>13</sup>C NMR spectrum of compound **2s** (CDCl<sub>3</sub>, 100 MHz)

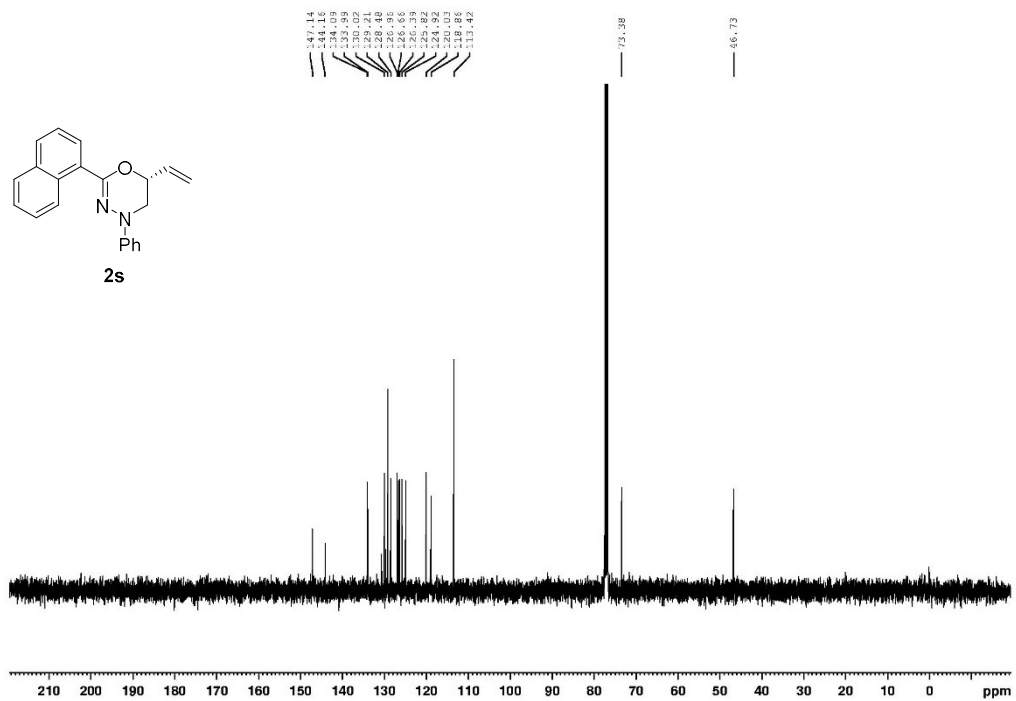

$^1\text{H}$  NMR spectrum of compound **2t** ( $\text{CDCl}_3$ , 400 MHz)

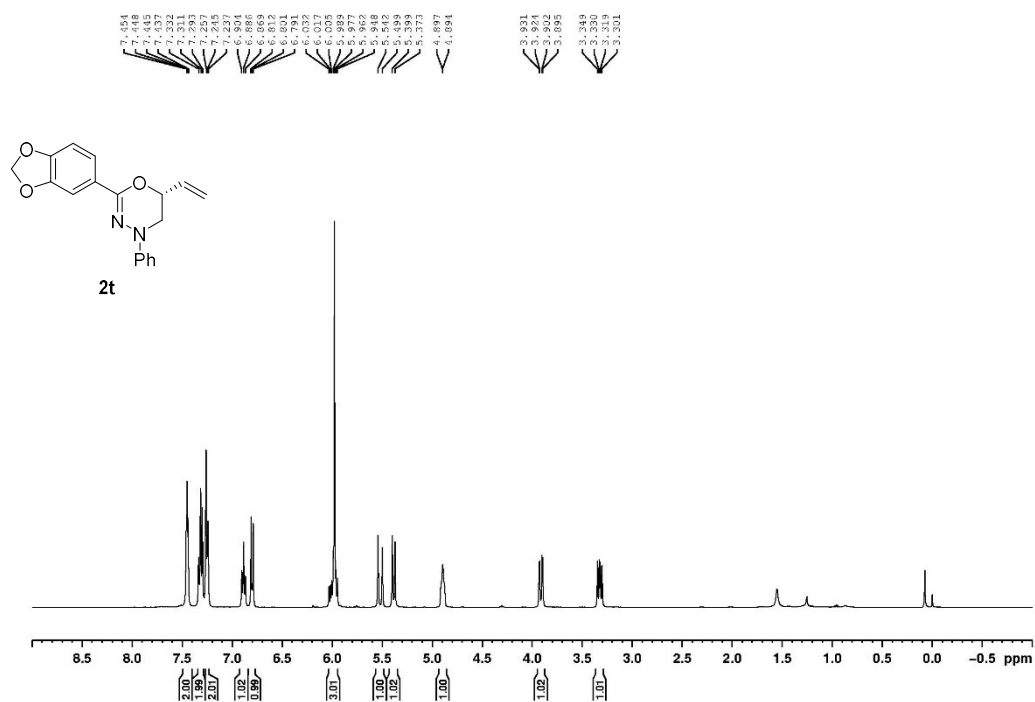

$^{13}\text{C}$  NMR spectrum of compound **2t** ( $\text{CDCl}_3$ , 100 MHz)

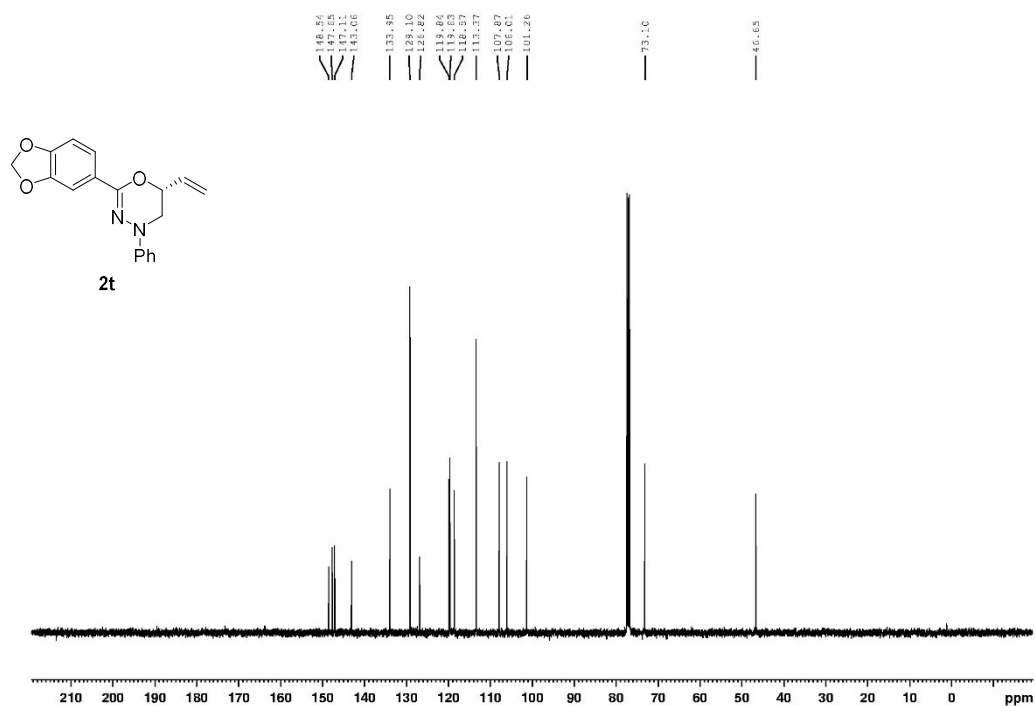

$^1\text{H}$  NMR spectrum of compound **2u** ( $\text{CDCl}_3$ , 400 MHz)

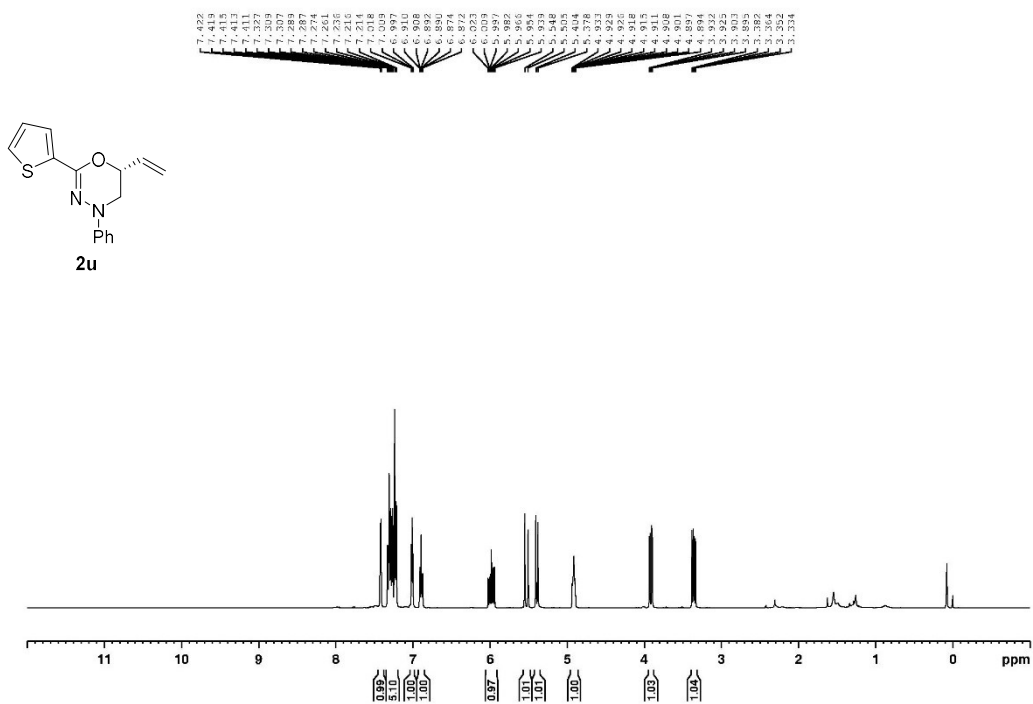

$^{13}\text{C}$  NMR spectrum of compound **2u** ( $\text{CDCl}_3$ , 100 MHz)

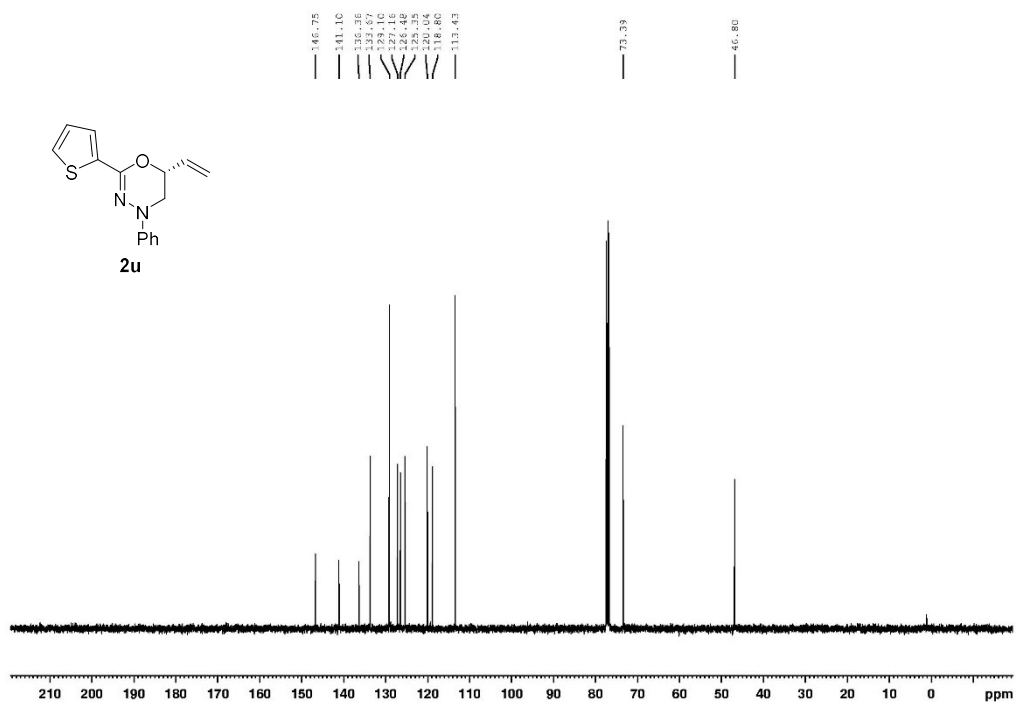

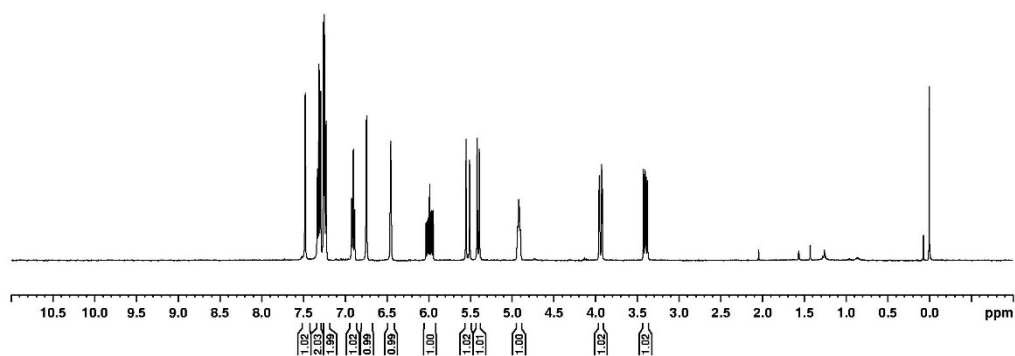

~~146.82~~  
~~146.39~~  
~~143.29~~  
~~138.00~~  
~~133.60~~  
~~129.14~~  
~~120.25~~  
~~119.04~~  
~~113.67~~  
~~112.24~~  
~~109.32~~  
 \_\_\_\_\_73.32  
 \_\_\_\_\_47.08

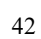

$^1\text{H}$  NMR spectrum of compound **2w** ( $\text{CDCl}_3$ , 400 MHz)

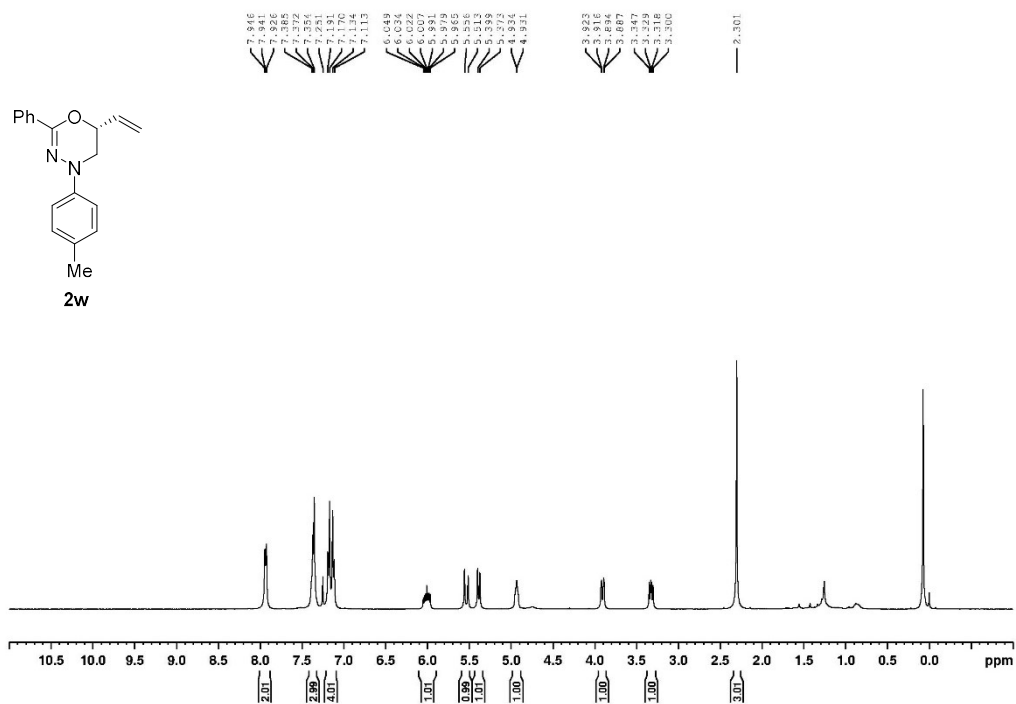

$^{13}\text{C}$  NMR spectrum of compound **2w** ( $\text{CDCl}_3$ , 100 MHz)

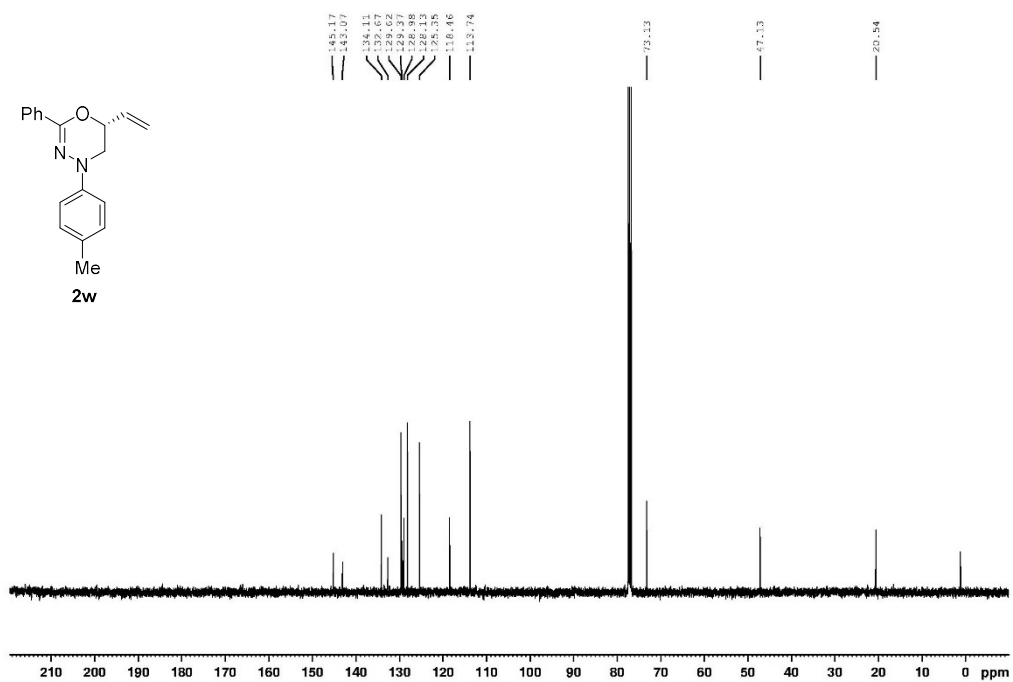

<sup>1</sup>H NMR spectrum of compound **2x** (CDCl<sub>3</sub>, 400 MHz)

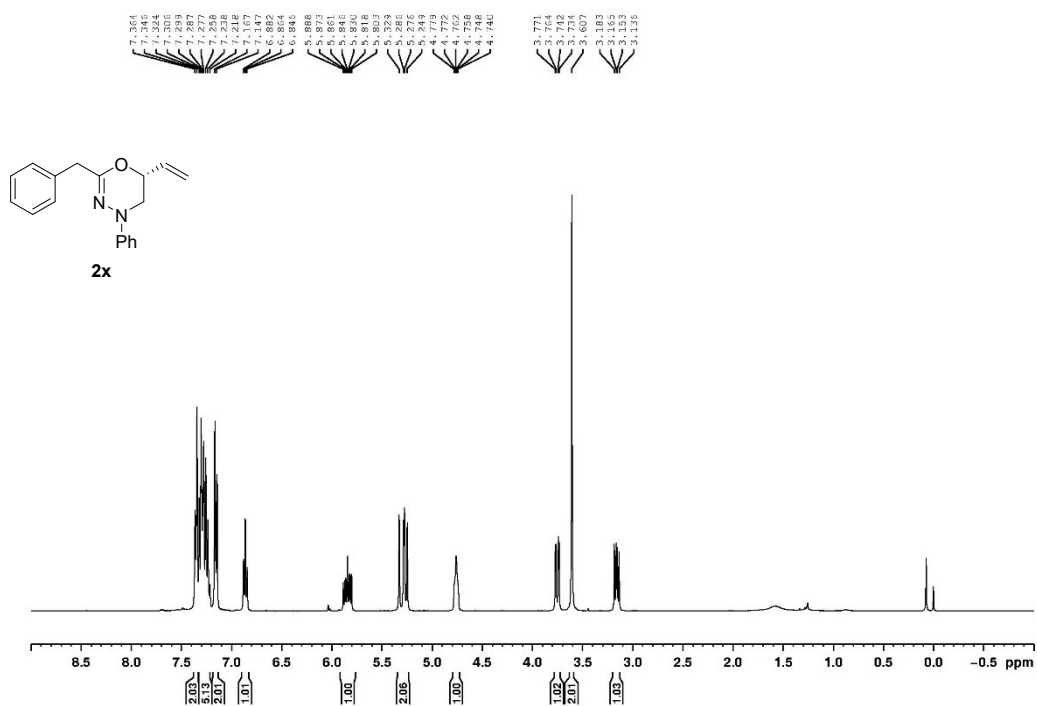

<sup>13</sup>C NMR spectrum of compound **2x** (CDCl<sub>3</sub>, 100 MHz)

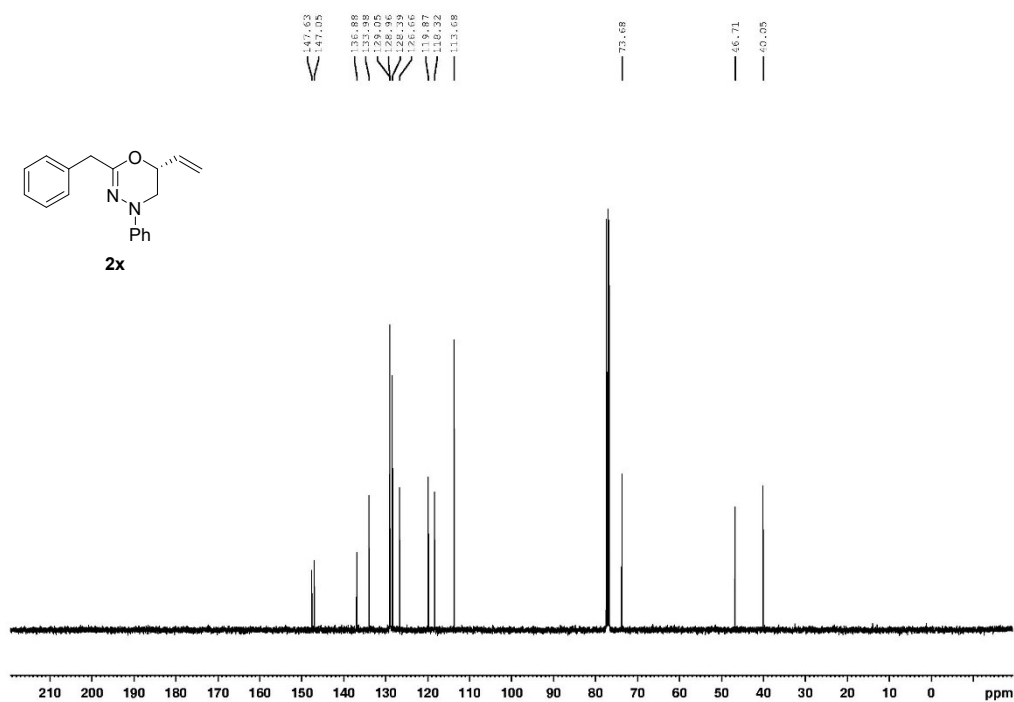



$^1\text{H}$  NMR spectrum of compound **4a** ( $\text{CDCl}_3$ , 400 MHz)

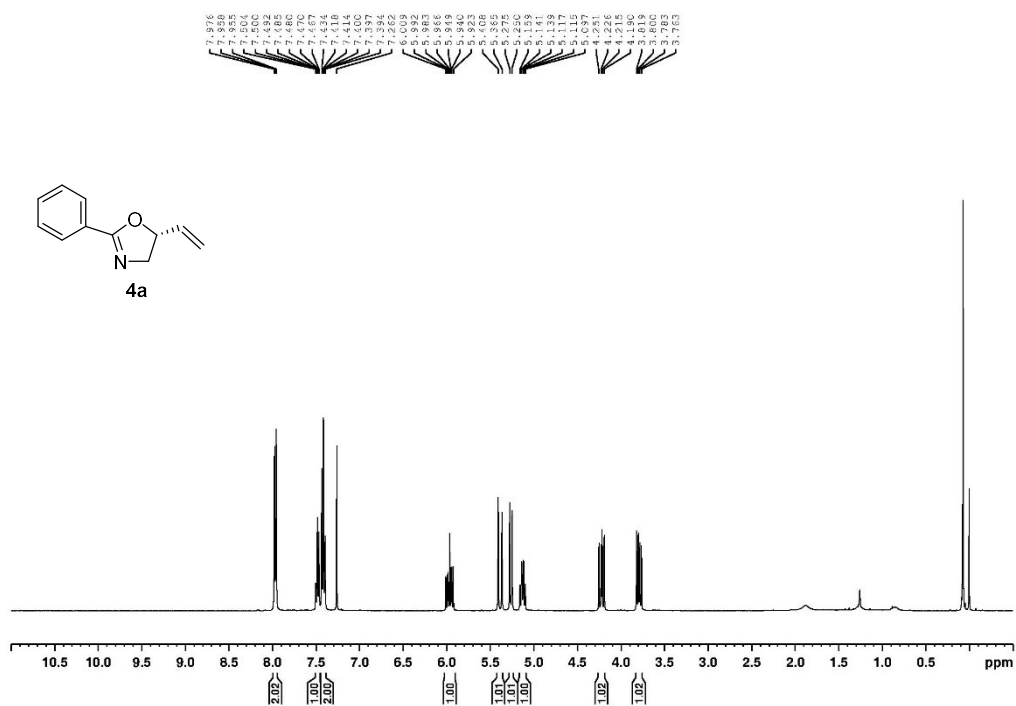

$^{13}\text{C}$  NMR spectrum of compound **4a** ( $\text{CDCl}_3$ , 100 MHz)

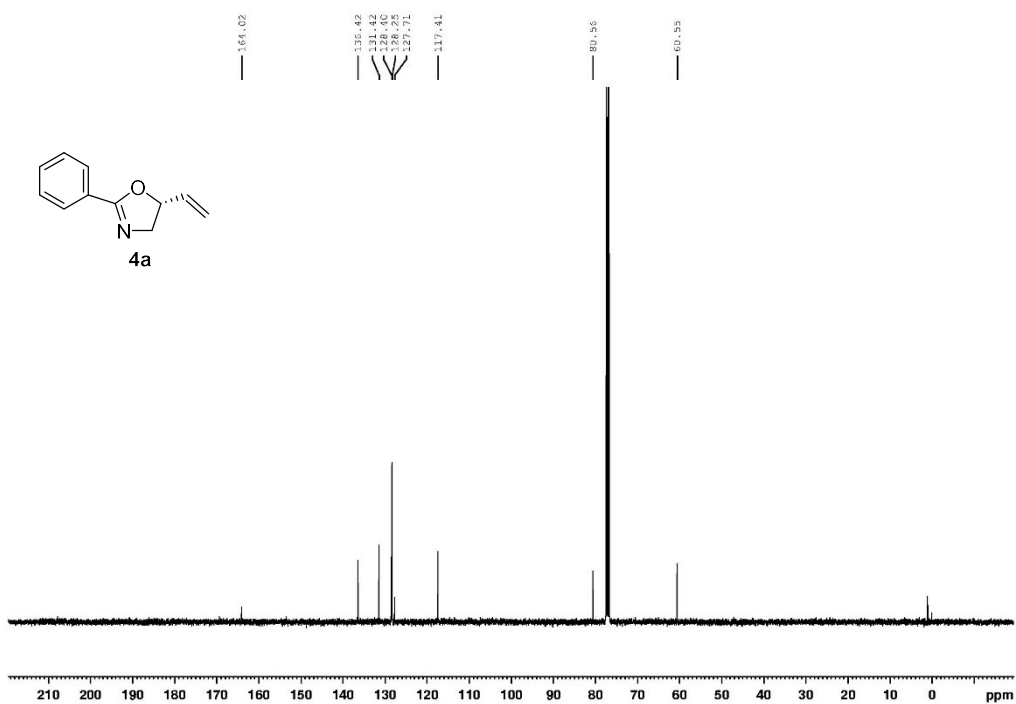

$^1\text{H}$  NMR spectrum of compound **4b** ( $\text{CDCl}_3$ , 400 MHz)

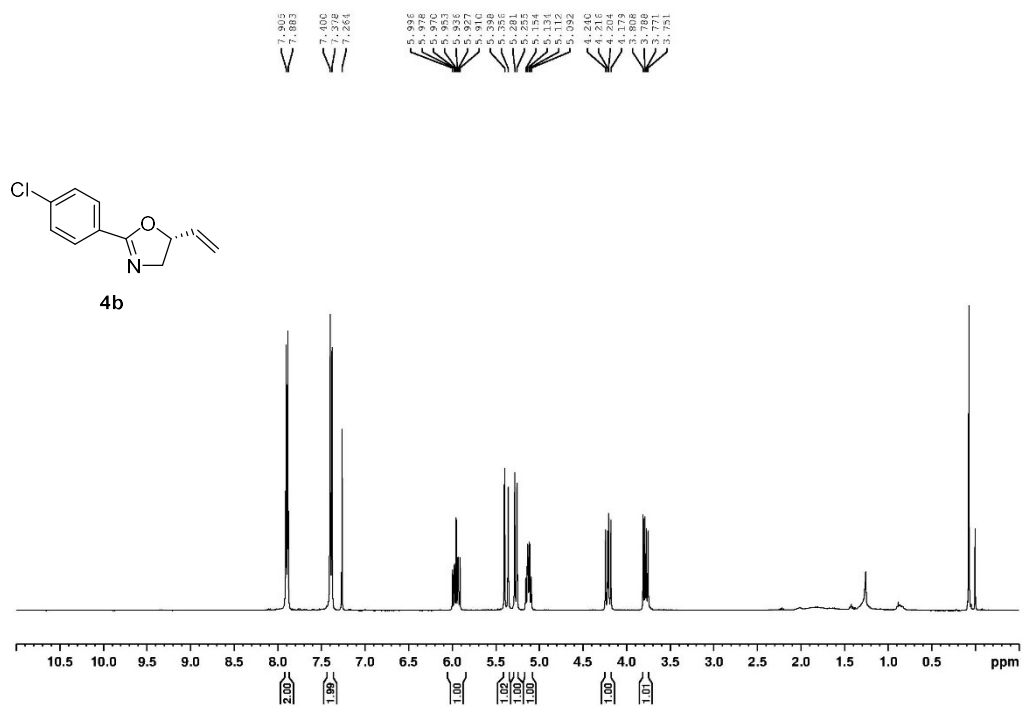

$^{13}\text{C}$  NMR spectrum of compound **4b** ( $\text{CDCl}_3$ , 100 MHz)

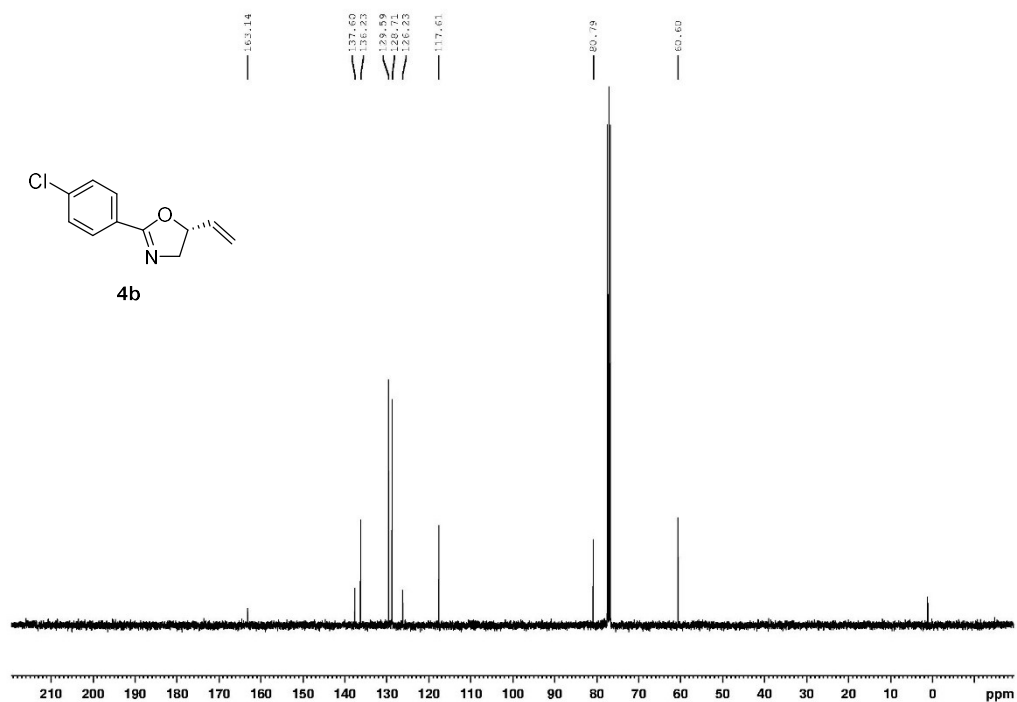

<sup>1</sup>H NMR spectrum of compound **4c** (CDCl<sub>3</sub>, 400 MHz)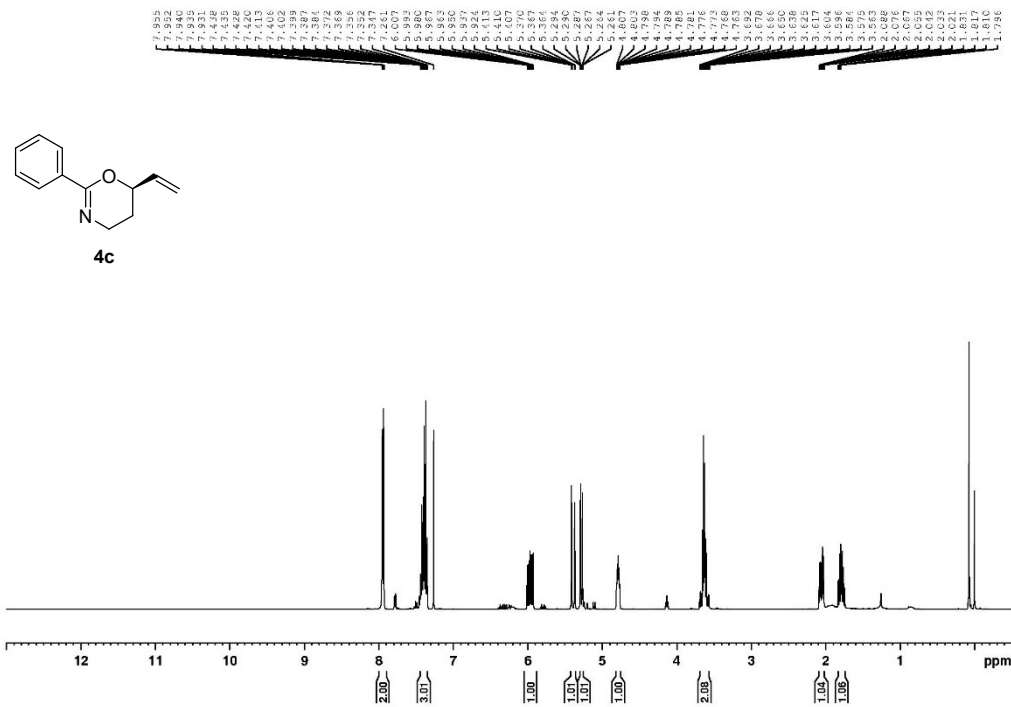

<sup>13</sup>C NMR spectrum of compound **4c** (CDCl<sub>3</sub>, 100 MHz)

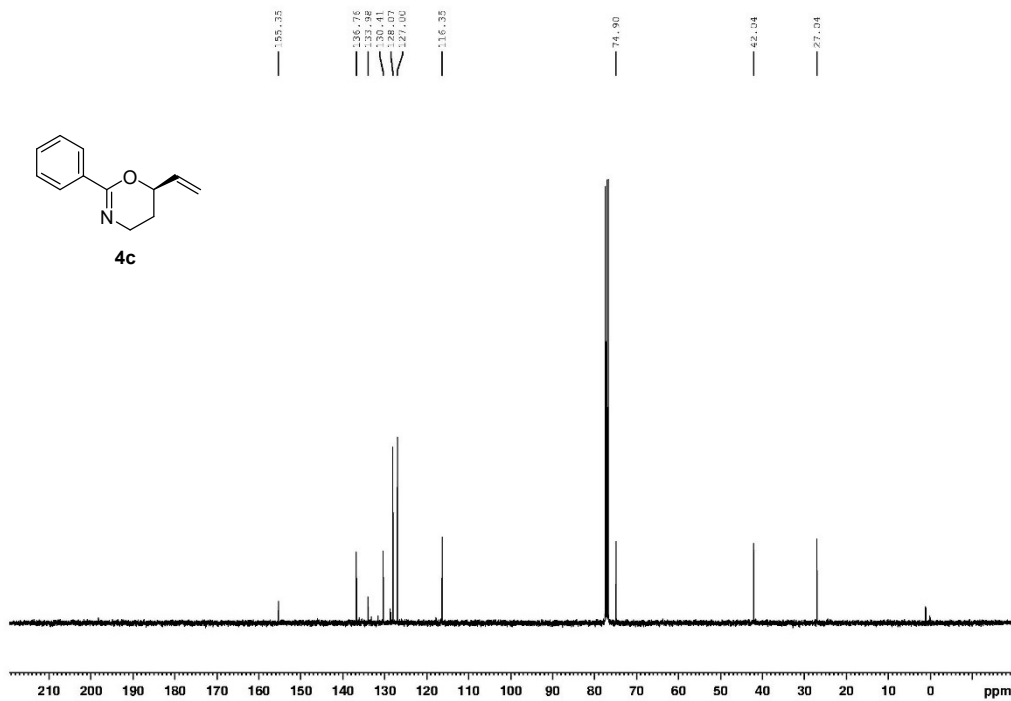

<sup>1</sup>H NMR spectrum of compound **4d** (CDCl<sub>3</sub>, 400 MHz)

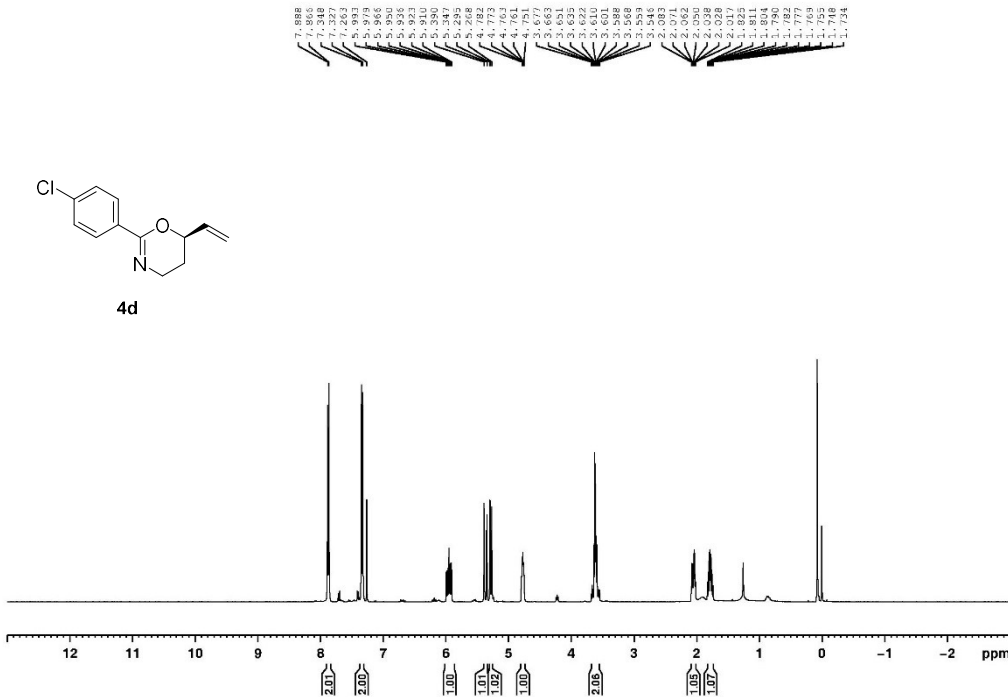

<sup>13</sup>C NMR spectrum of compound **4d** (CDCl<sub>3</sub>, 100 MHz)

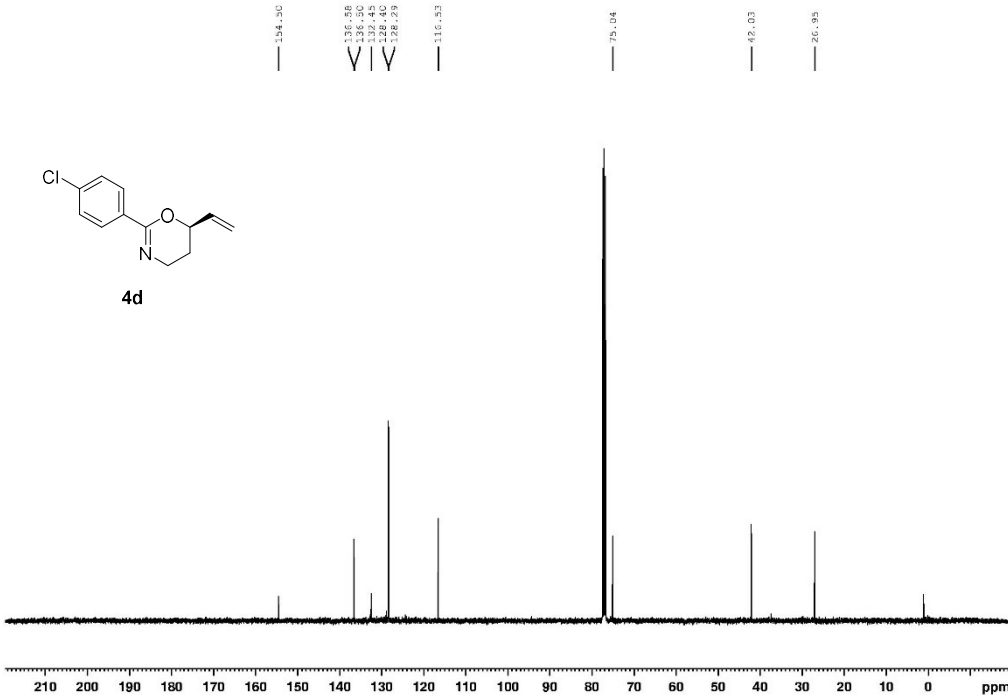

<sup>1</sup>H NMR spectrum of compound **4e** (CDCl<sub>3</sub>, 400 MHz)

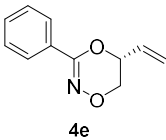

<sup>13</sup>C NMR spectrum of compound **4e** (CDCl<sub>3</sub>, 100 MHz)

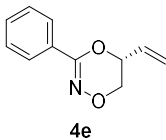

<sup>1</sup>H NMR spectrum of compound **5** (CDCl<sub>3</sub>, 400 MHz)

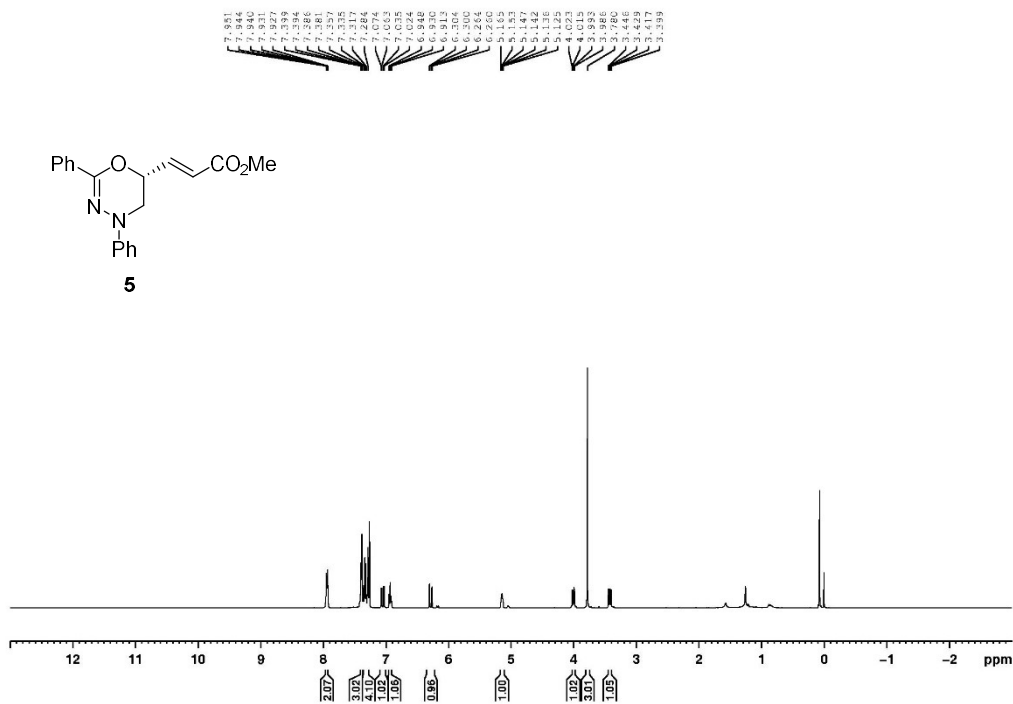

<sup>13</sup>C NMR spectrum of compound **5** (CDCl<sub>3</sub>, 100 MHz)

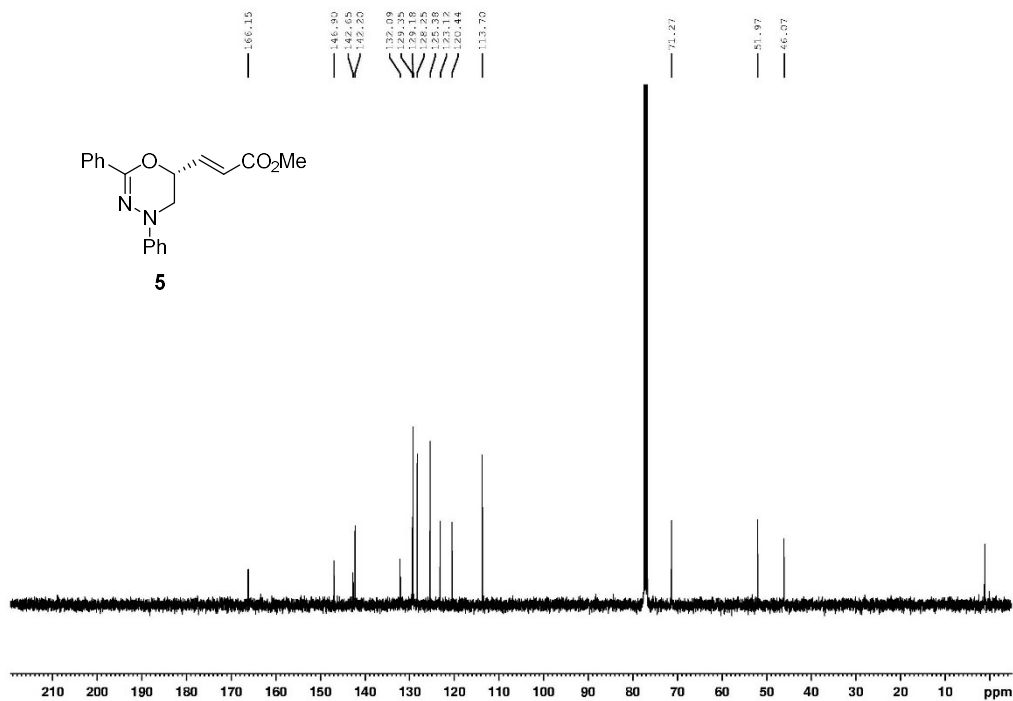

<sup>1</sup>H NMR spectrum of compound **6** (CDCl<sub>3</sub>, 400 MHz)

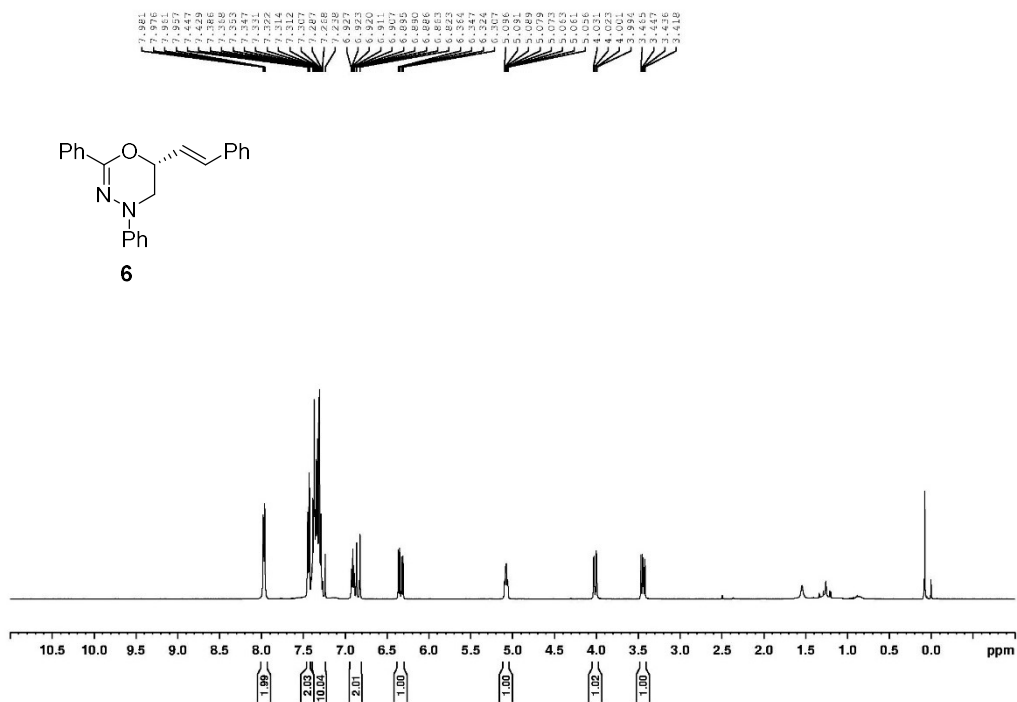

<sup>13</sup>C NMR spectrum of compound **6** (CDCl<sub>3</sub>, 100 MHz)

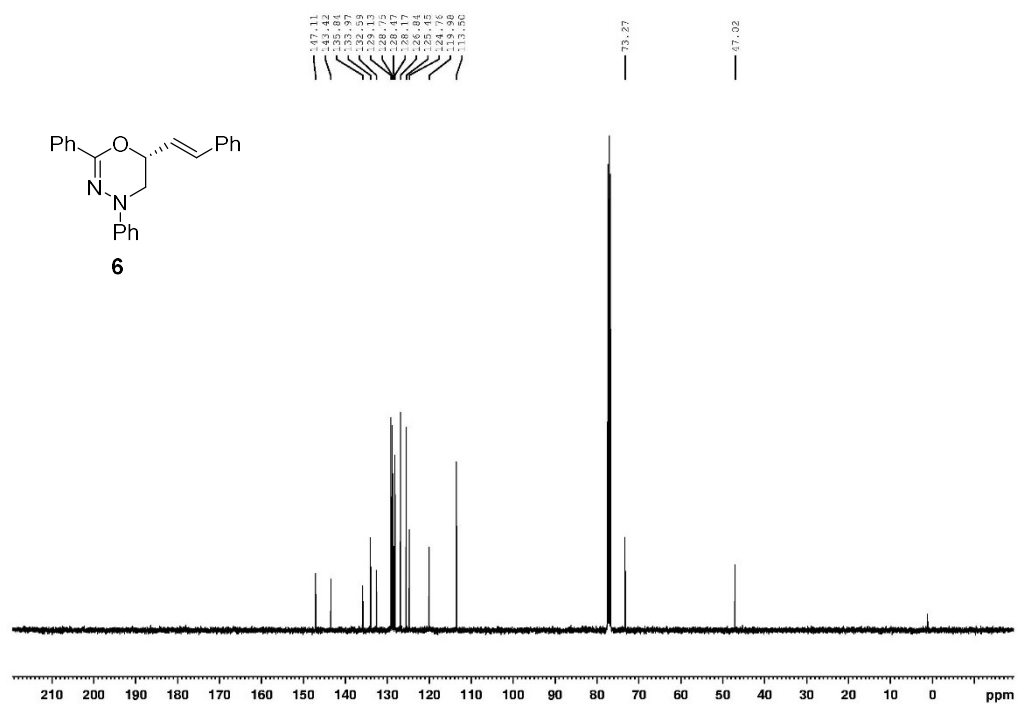

<sup>1</sup>H NMR spectrum of compound **7** (CDCl<sub>3</sub>, 400 MHz)

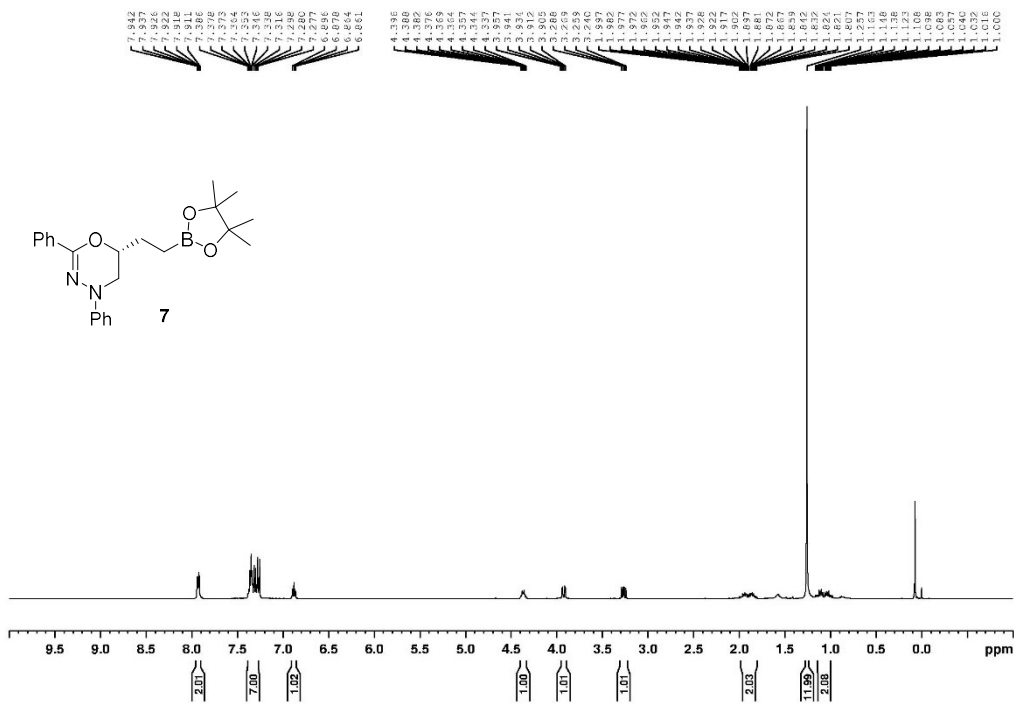

<sup>13</sup>C NMR spectrum of compound **7** (CDCl<sub>3</sub>, 100 MHz)

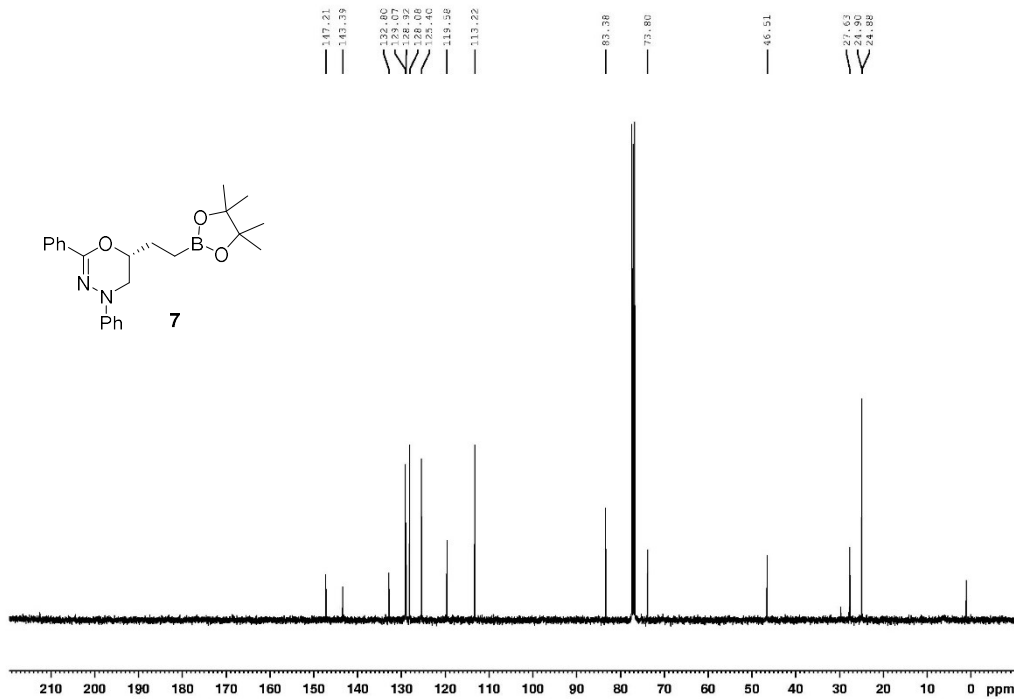



## 8. HPLC spectra of compounds 2a–2x, 4a–4e and 5–7

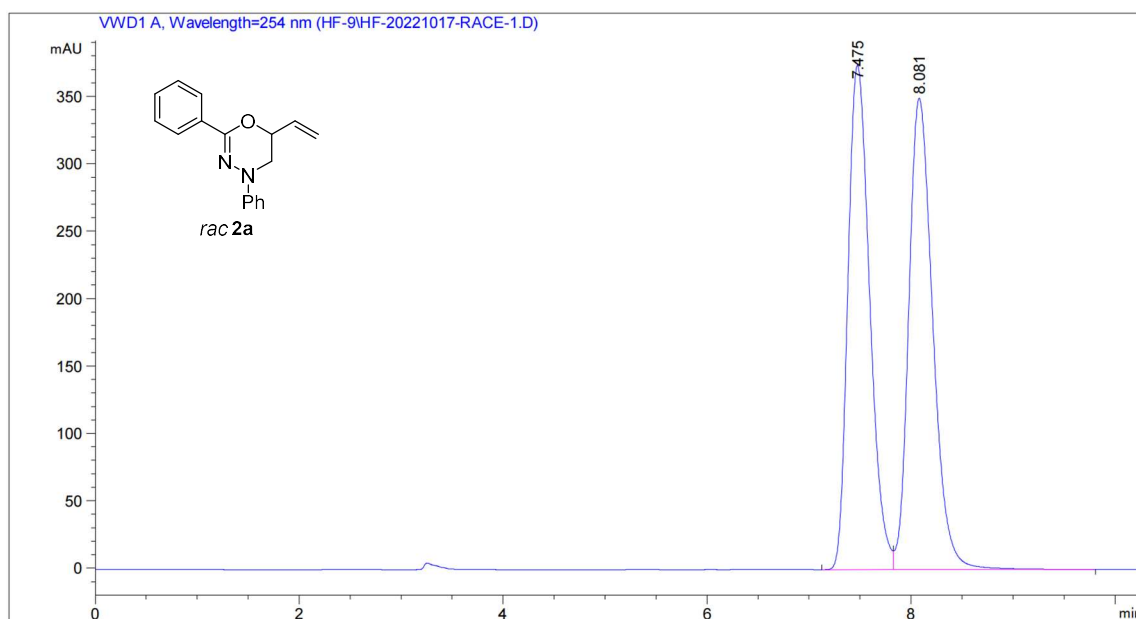

| Peak | Processed channel | Retention time (min) | Peak area (m AU*s) | Peak height (m AU) | Peak area (%) |
|------|-------------------|----------------------|--------------------|--------------------|---------------|
| 1    | PDA 254 nm        | 7.475                | 5545.14697         | 374.06250          | 49.1919       |
| 2    | PDA 254 nm        | 8.081                | 5727.32813         | 349.65039          | 50.8081       |

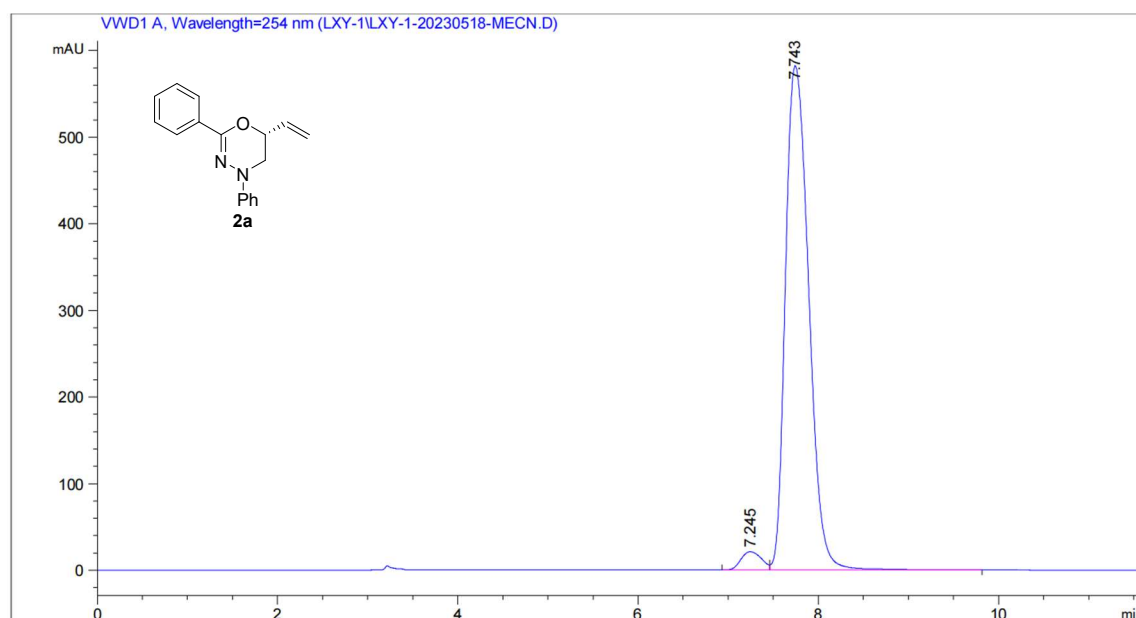

| Peak | Processed channel | Retention time (min) | Peak area (m AU*s) | Peak height (m AU) | Peak area (%) |
|------|-------------------|----------------------|--------------------|--------------------|---------------|
| 1    | PDA 254 nm        | 7.245                | 332.31720          | 21.01497           | 3.0923        |
| 2    | PDA 254 nm        | 7.743                | 1.04141e4          | 582.07324          | 96.9077       |

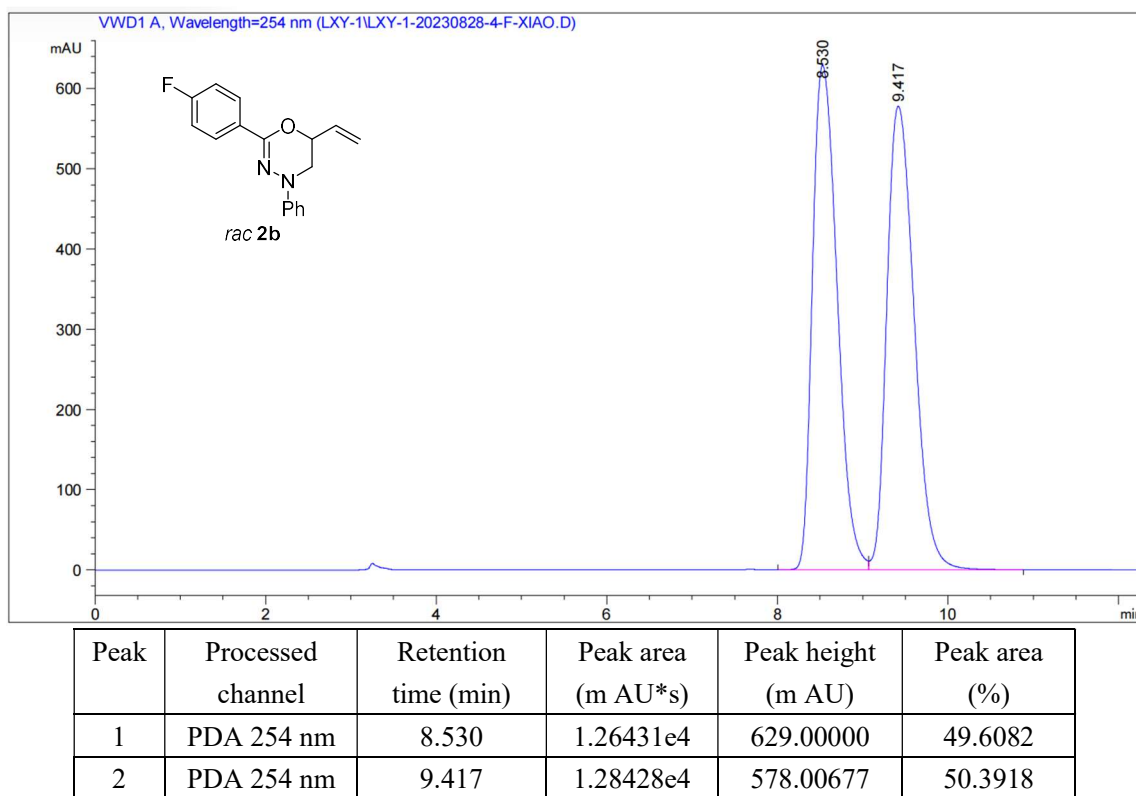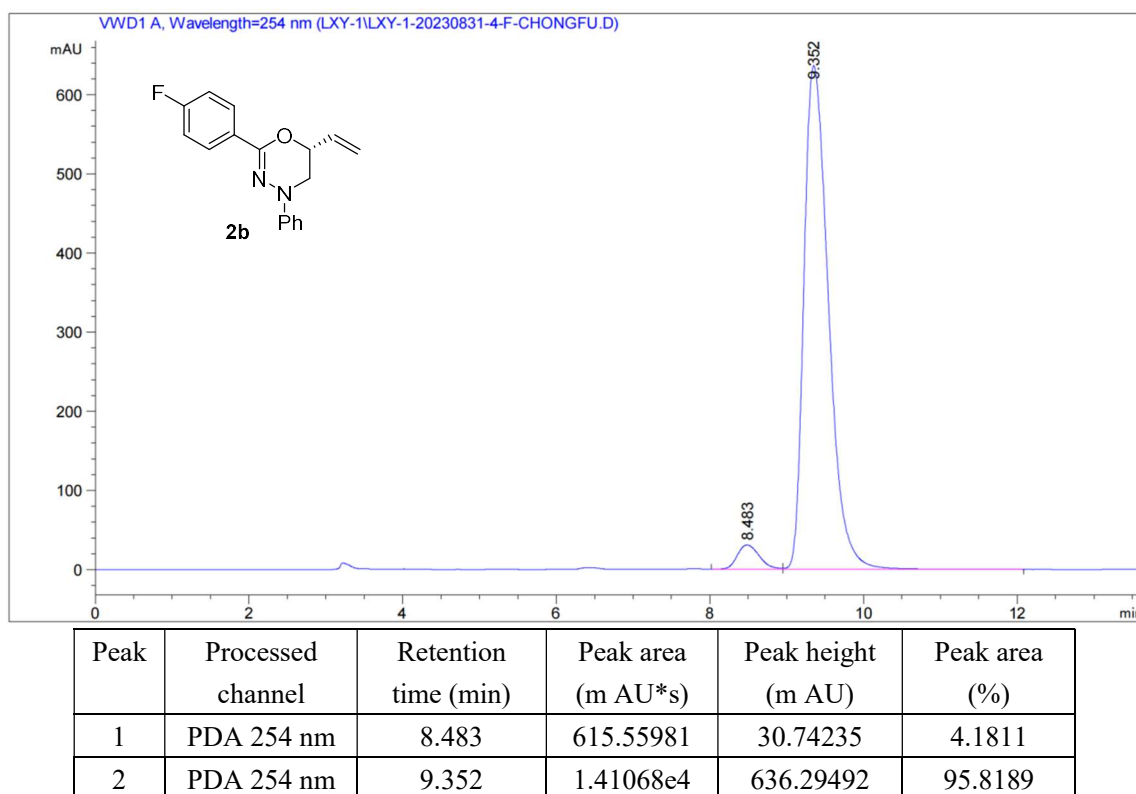

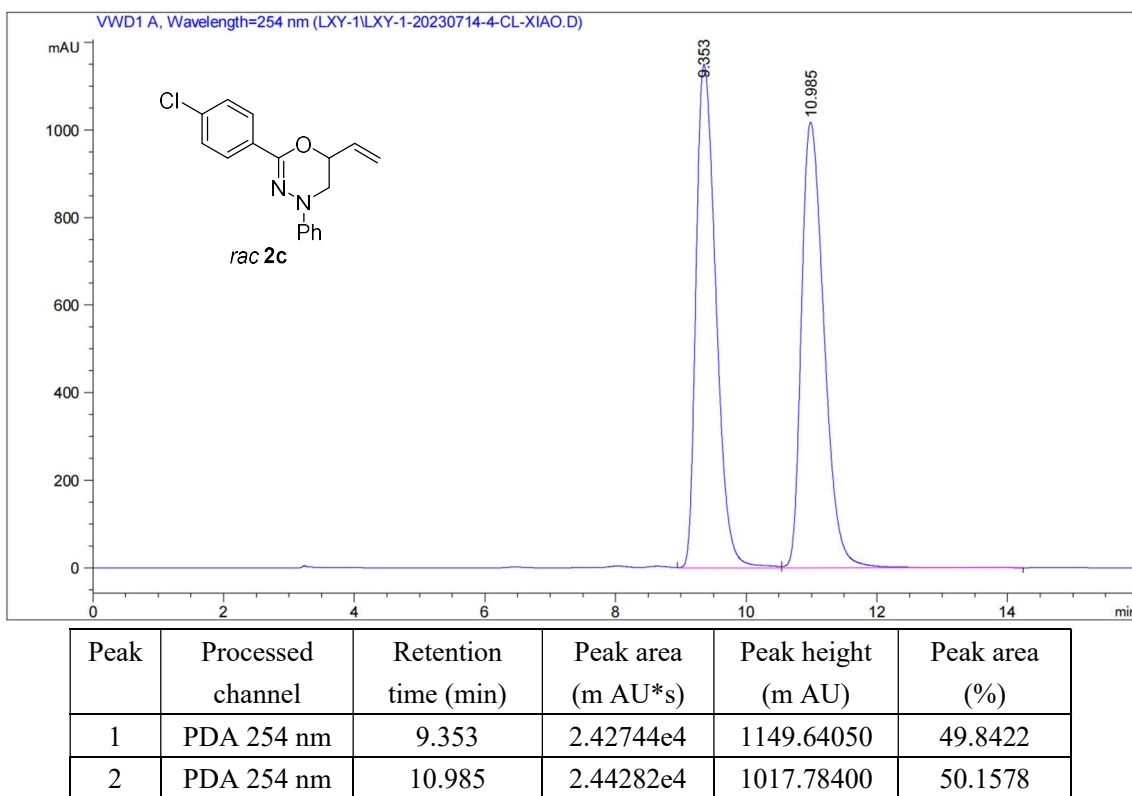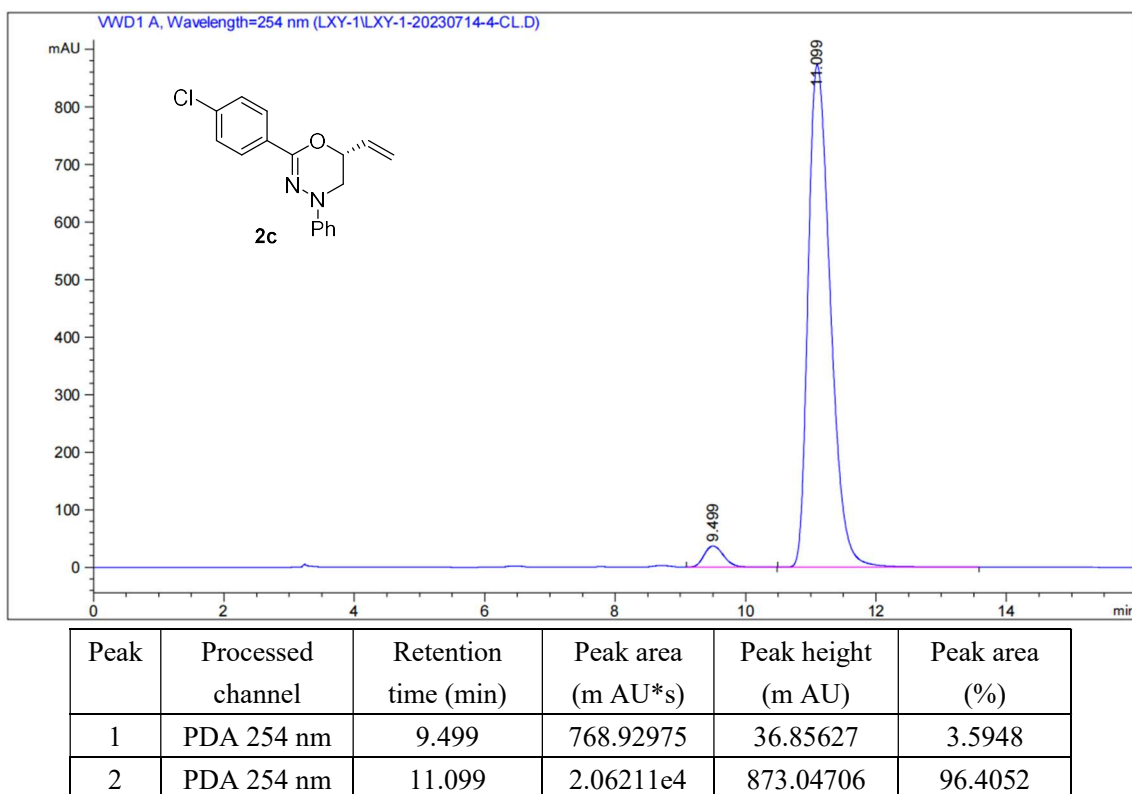

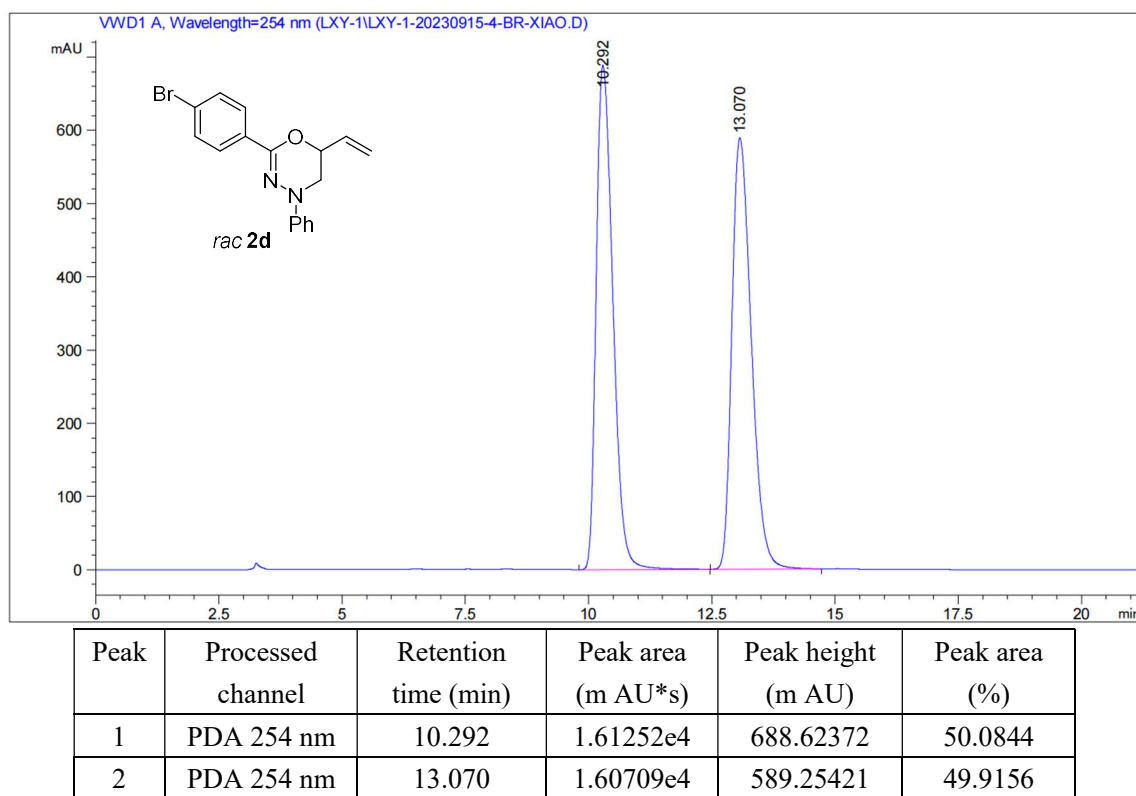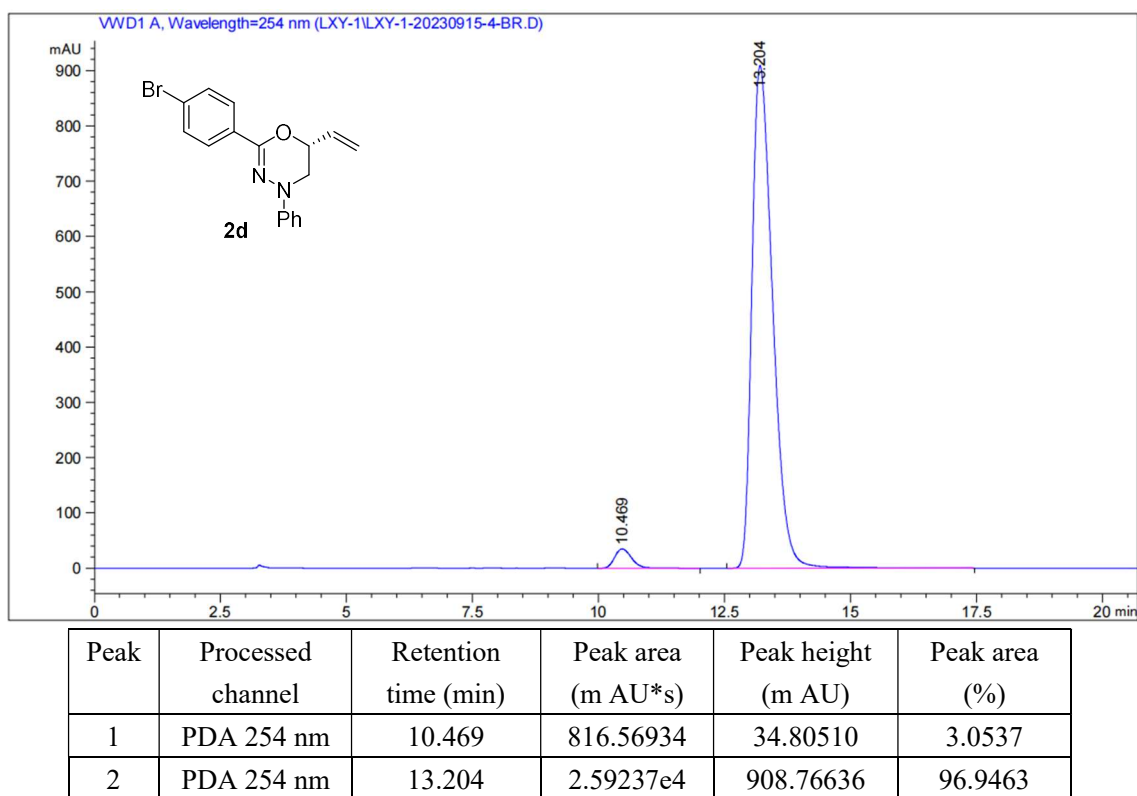

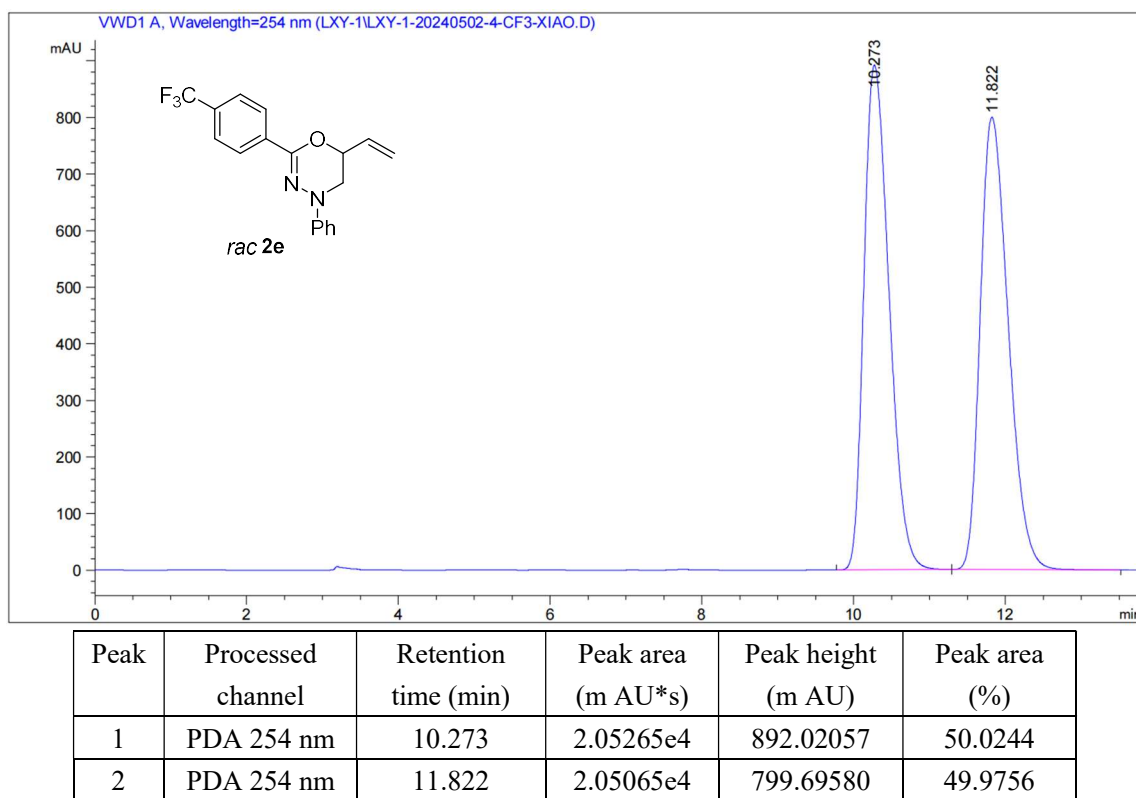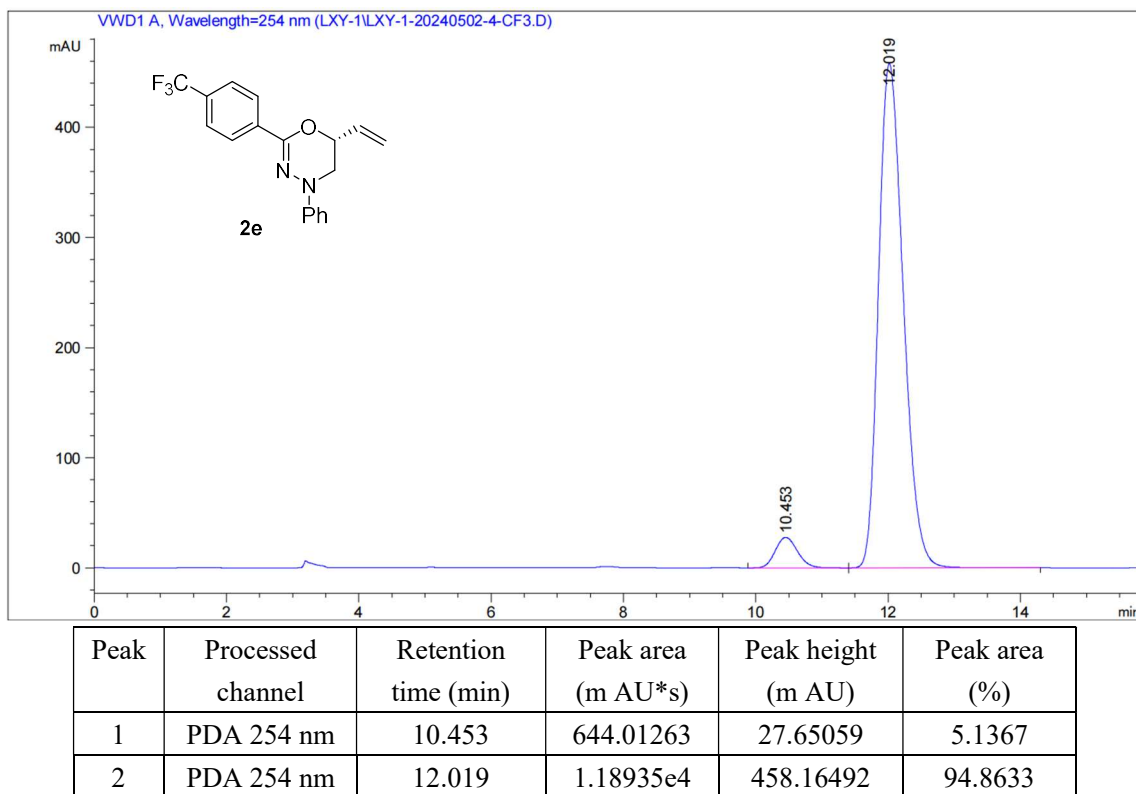

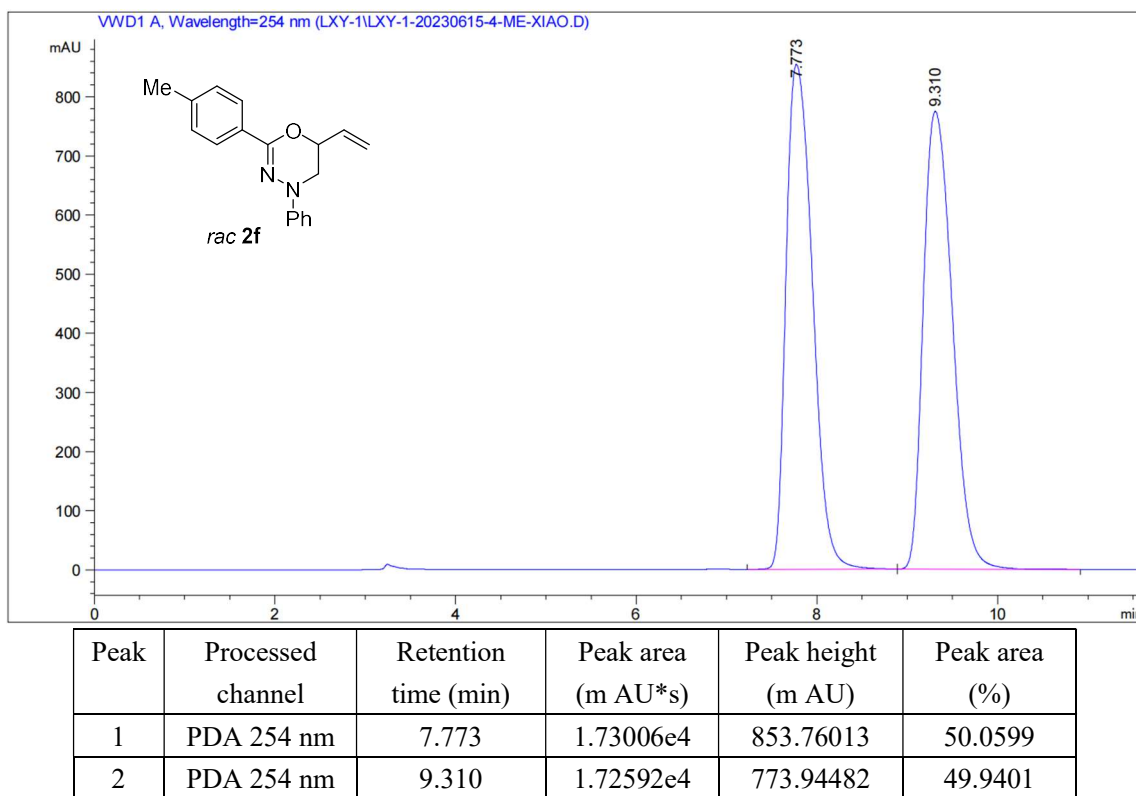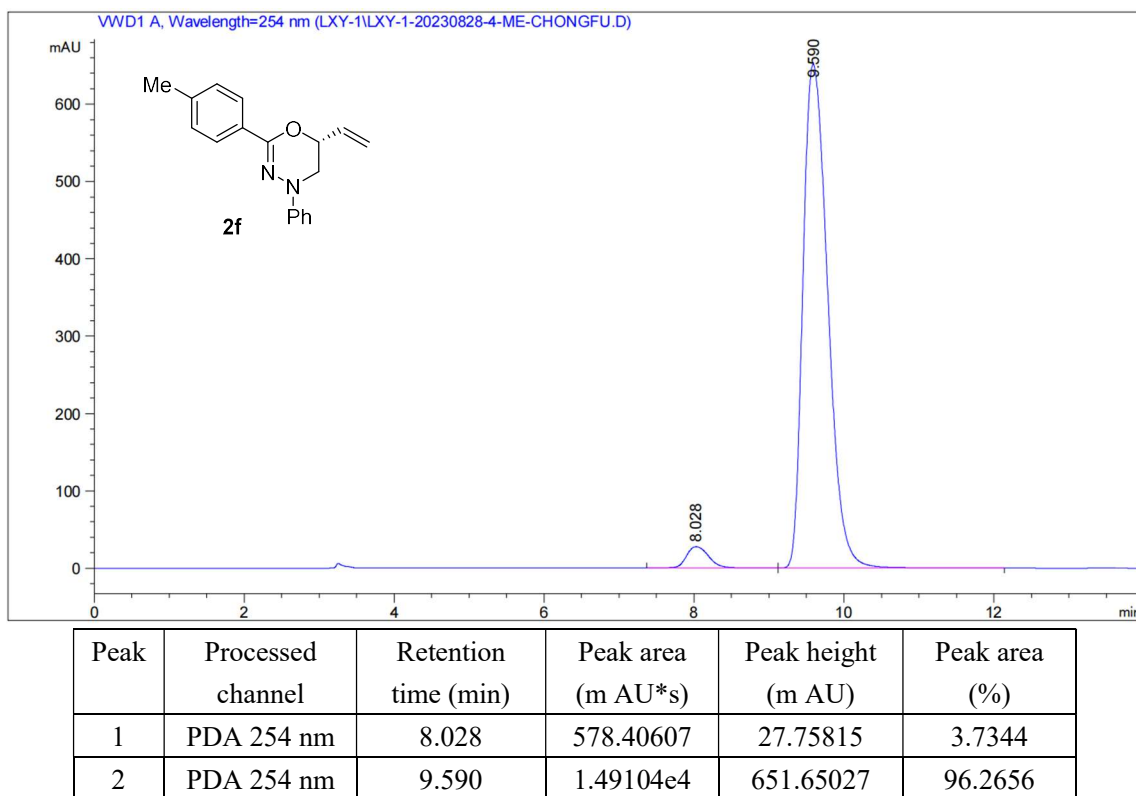

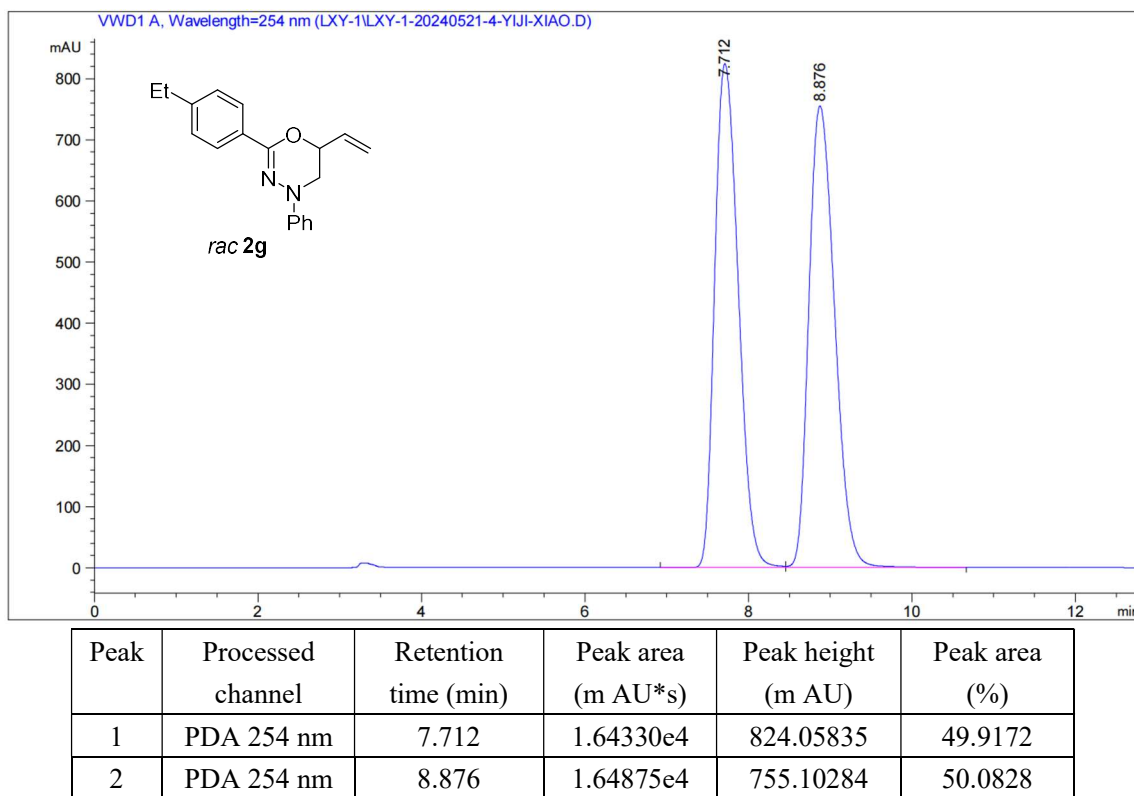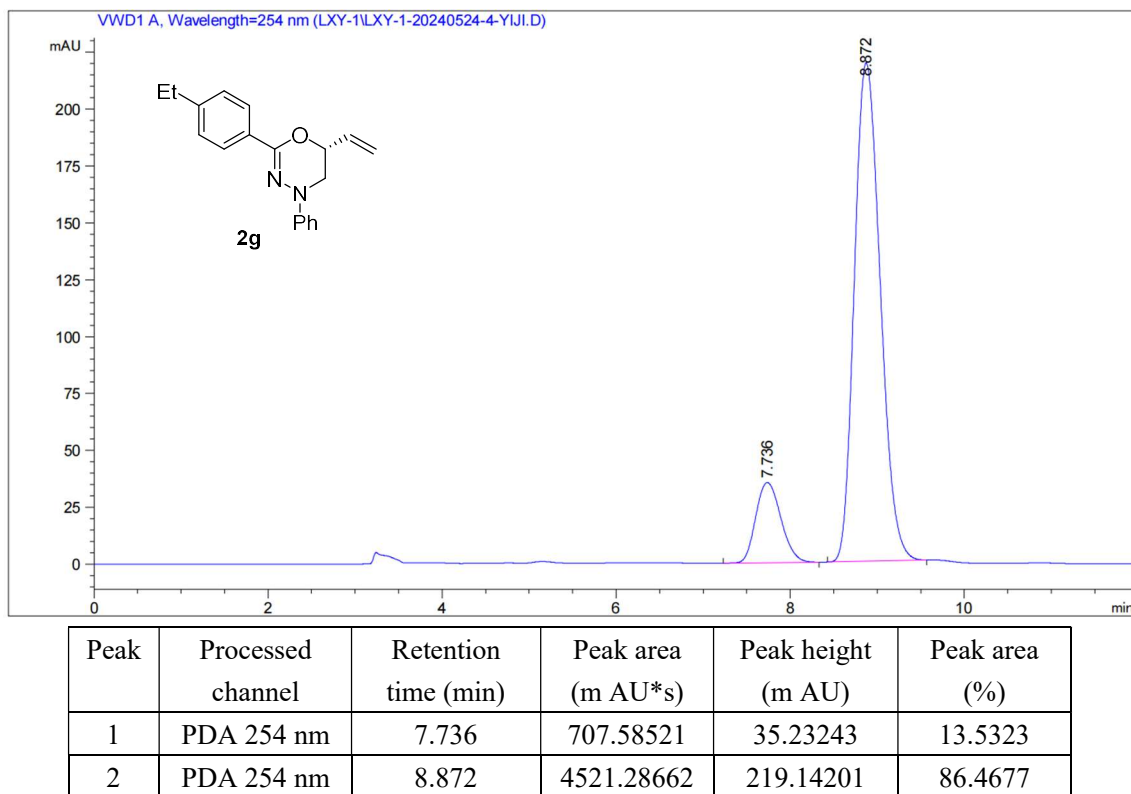

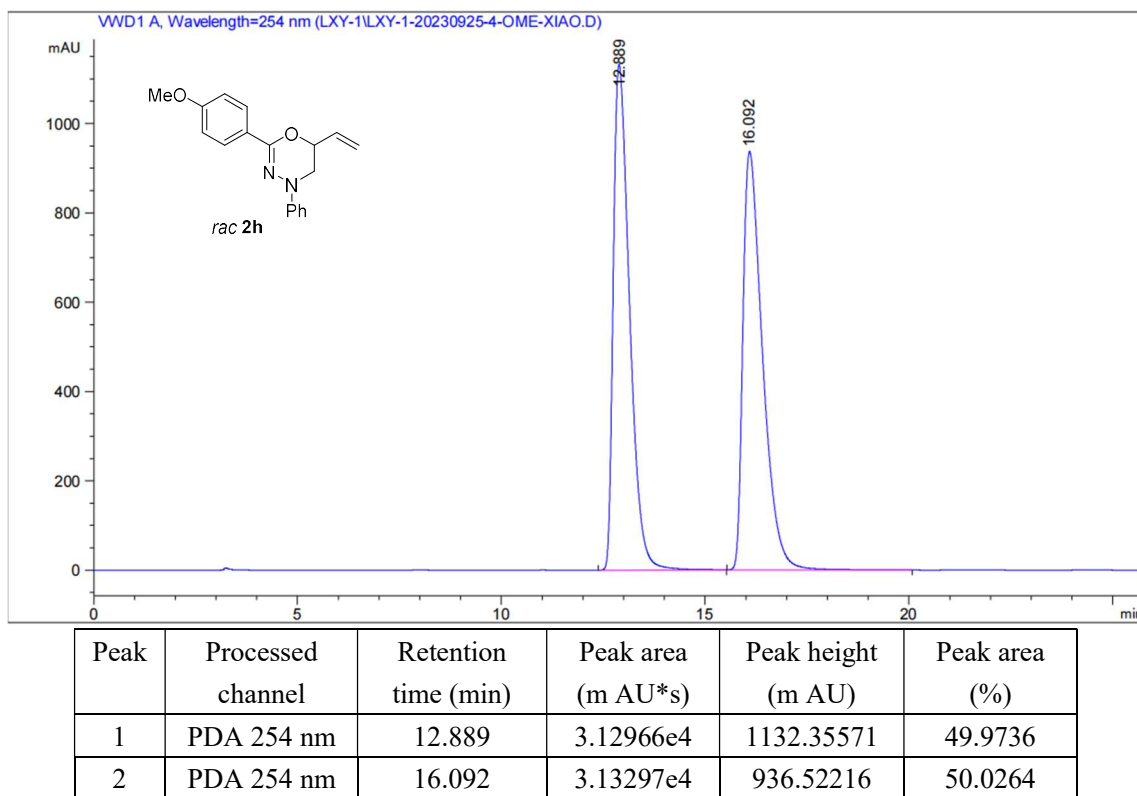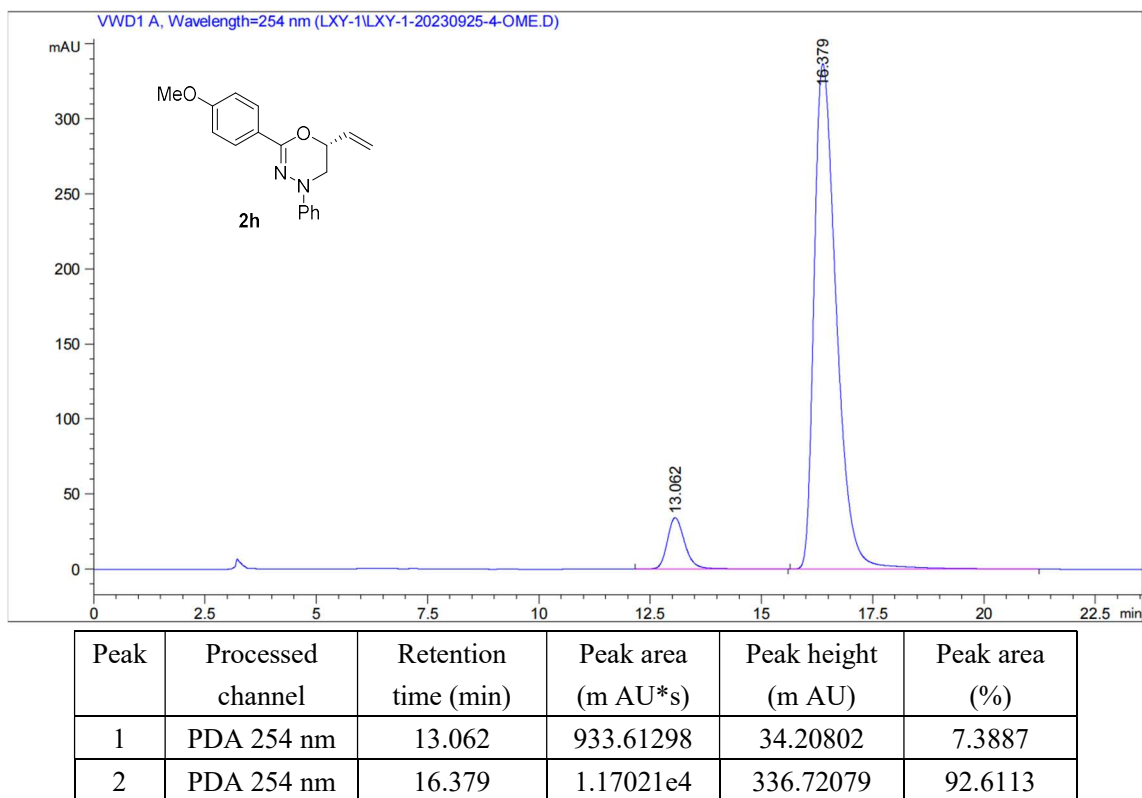



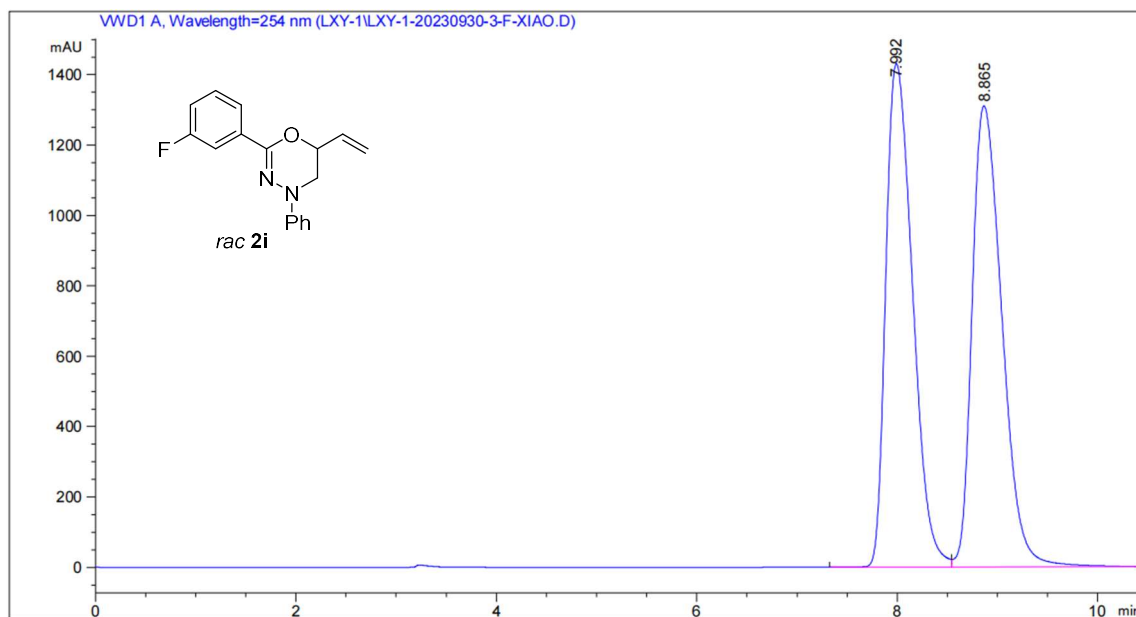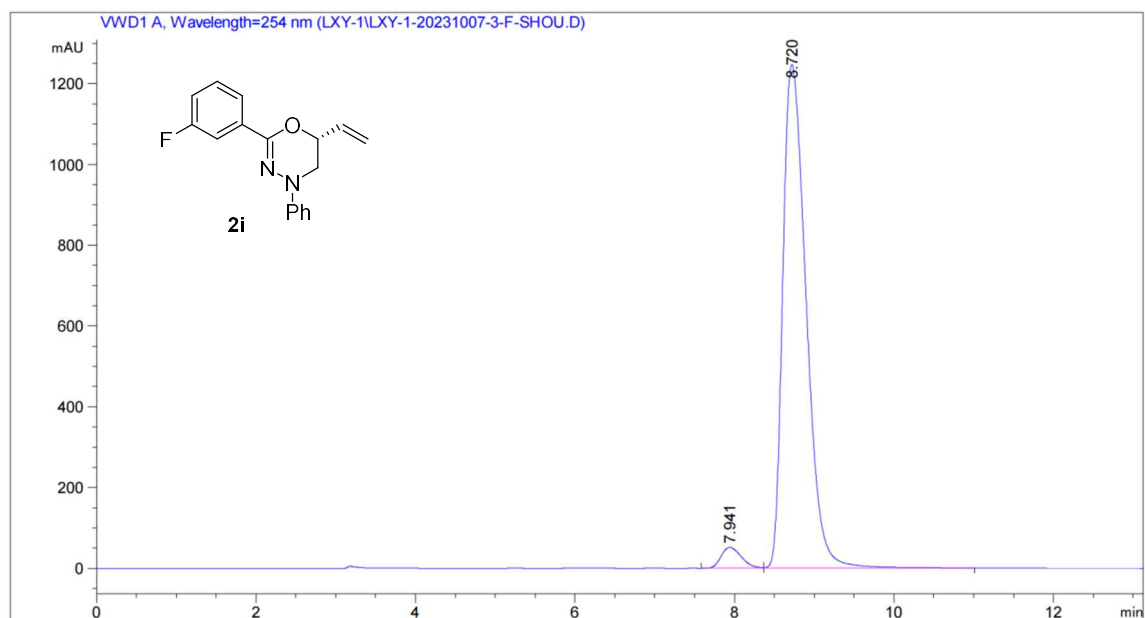

| Peak | Processed channel | Retention time (min) | Peak area (m AU*s) | Peak height (m AU) | Peak area (%) |
|------|-------------------|----------------------|--------------------|--------------------|---------------|
| 1    | PDA 254 nm        | 7.941                | 908.20709          | 51.38763           | 3.4721        |
| 2    | PDA 254 nm        | 8.720                | 2.52493e4          | 1247.12488         | 96.5279       |

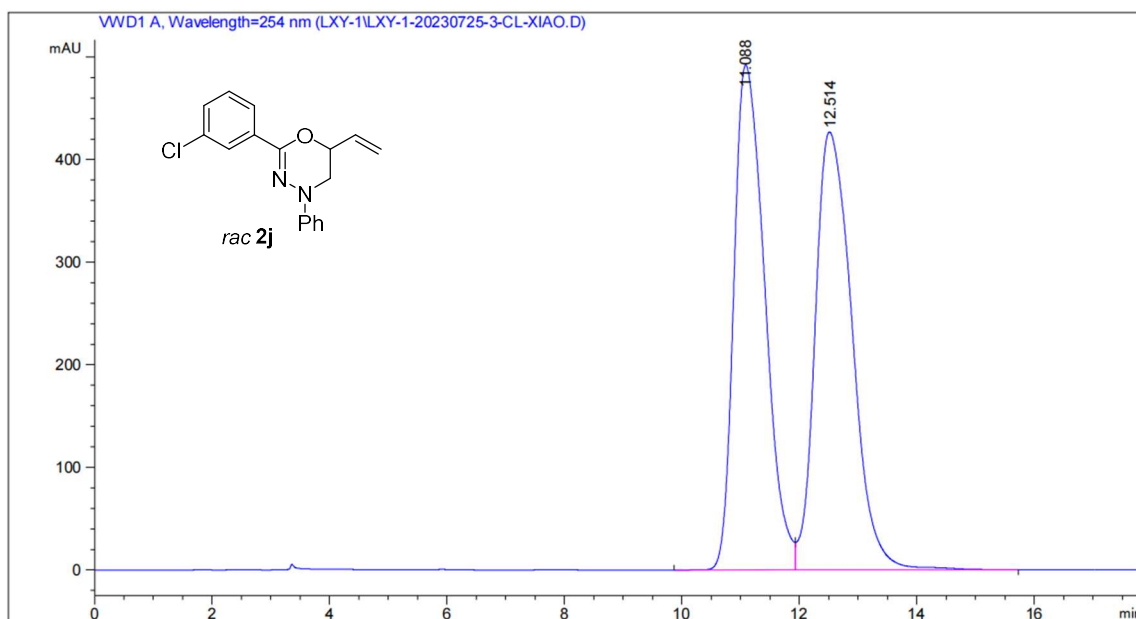

| Peak | Processed channel | Retention time (min) | Peak area (m AU*s) | Peak height (m AU) | Peak area (%) |
|------|-------------------|----------------------|--------------------|--------------------|---------------|
| 1    | PDA 254 nm        | 11.088               | 1.79578e4          | 492.42206          | 49.1083       |
| 2    | PDA 254 nm        | 12.514               | 1.86099e4          | 426.89667          | 50.8917       |

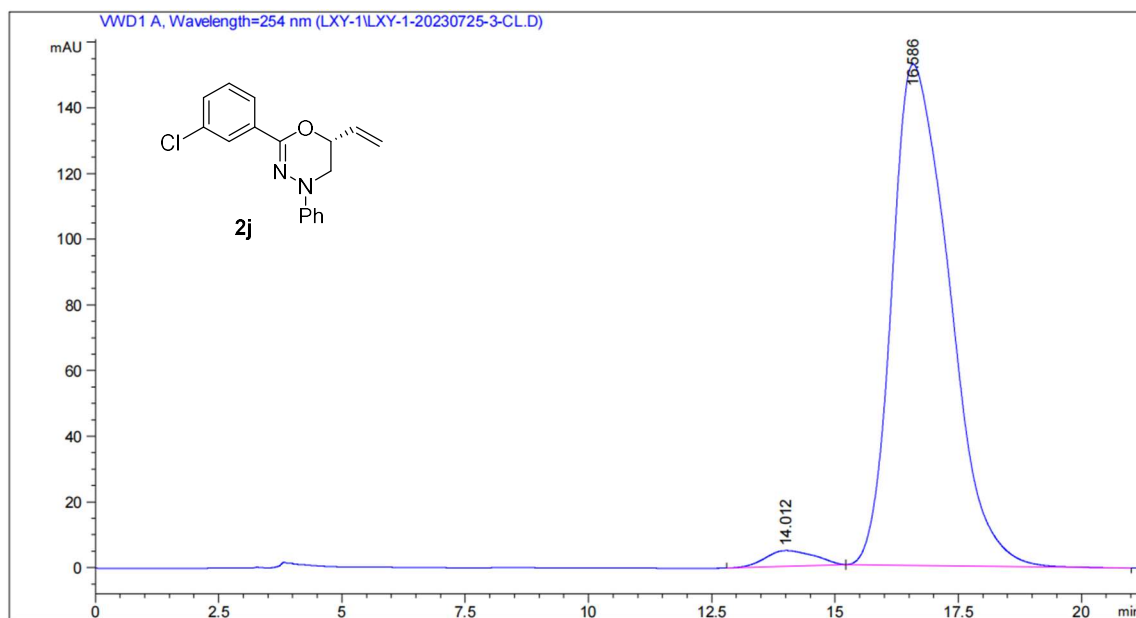

| Peak | Processed channel | Retention time (min) | Peak area (m AU*s) | Peak height (m AU) | Peak area (%) |
|------|-------------------|----------------------|--------------------|--------------------|---------------|
| 1    | PDA 254 nm        | 14.012               | 327.98294          | 4.80960            | 2.6002        |
| 2    | PDA 254 nm        | 16.586               | 1.22856e4          | 152.63437          | 97.3998       |

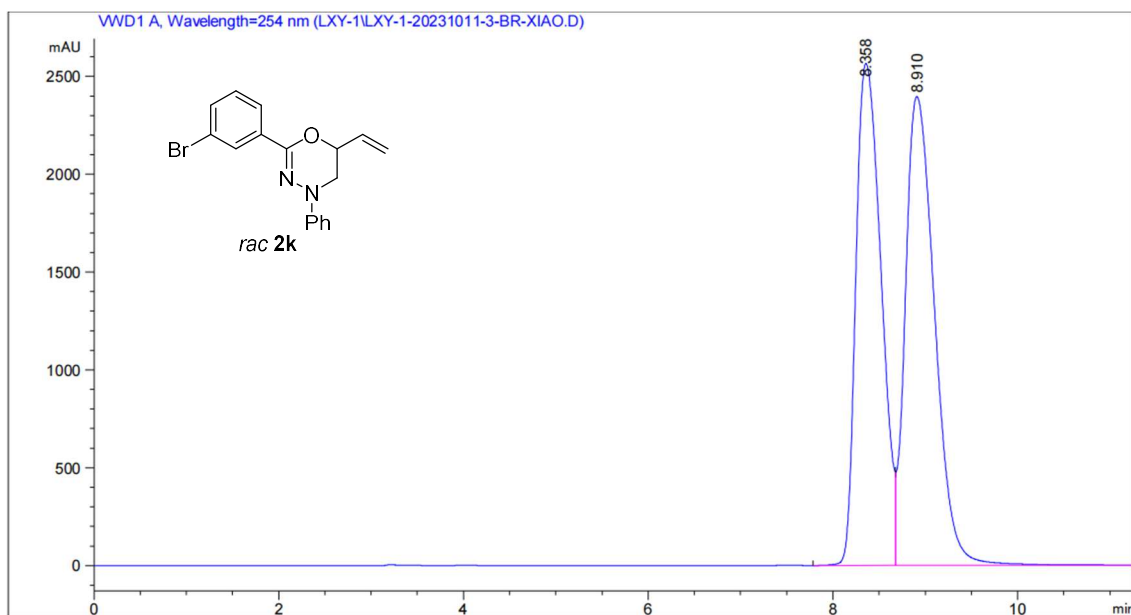

| Peak | Processed channel | Retention time (min) | Peak area (m AU*s) | Peak height (m AU) | Peak area (%) |
|------|-------------------|----------------------|--------------------|--------------------|---------------|
| 1    | PDA 254 nm        | 8.358                | 4.84731e4          | 2565.29932         | 47.8449       |
| 2    | PDA 254 nm        | 8.910                | 5.28400e4          | 2395.82495         | 52.1551       |

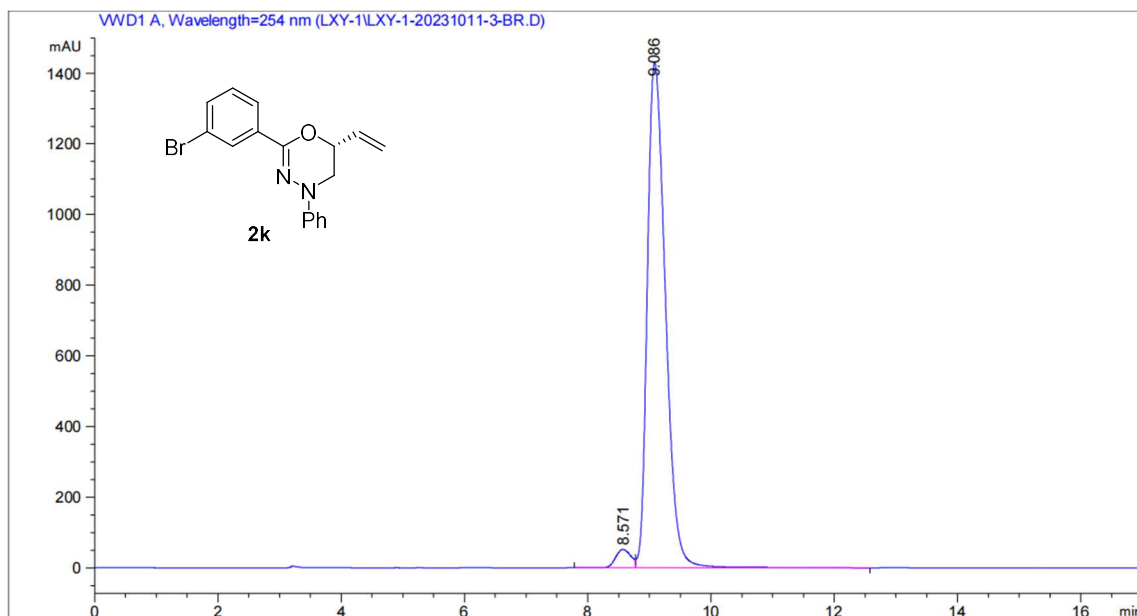

| Peak | Processed channel | Retention time (min) | Peak area (m AU*s) | Peak height (m AU) | Peak area (%) |
|------|-------------------|----------------------|--------------------|--------------------|---------------|
| 1    | PDA 254 nm        | 8.571                | 887.73608          | 51.71880           | 2.9675        |
| 2    | PDA 254 nm        | 9.086                | 2.90274e4          | 1428.66882         | 97.0325       |

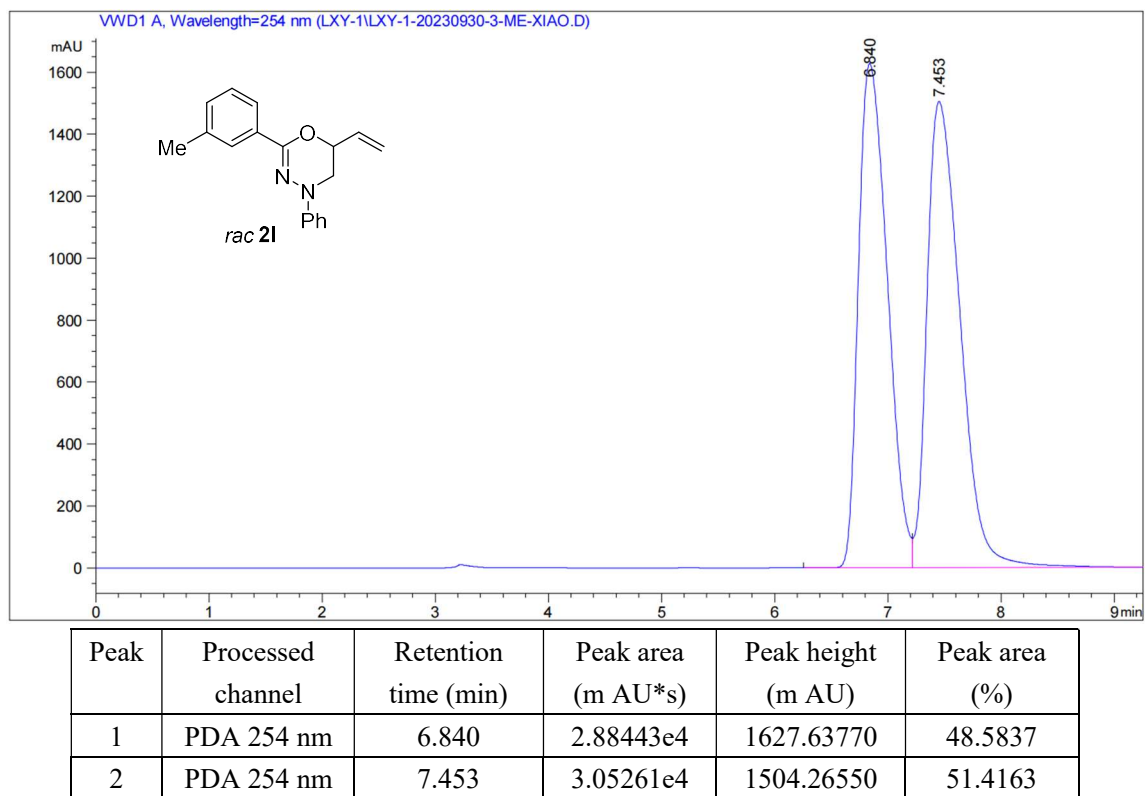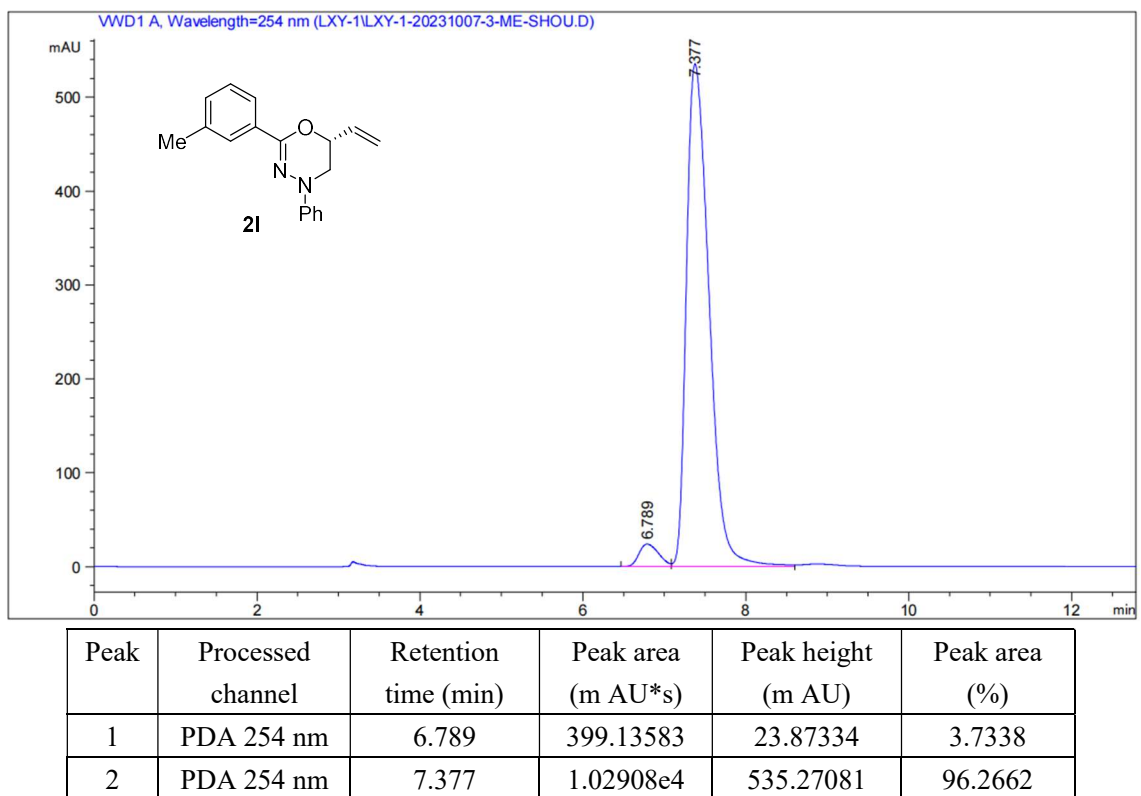

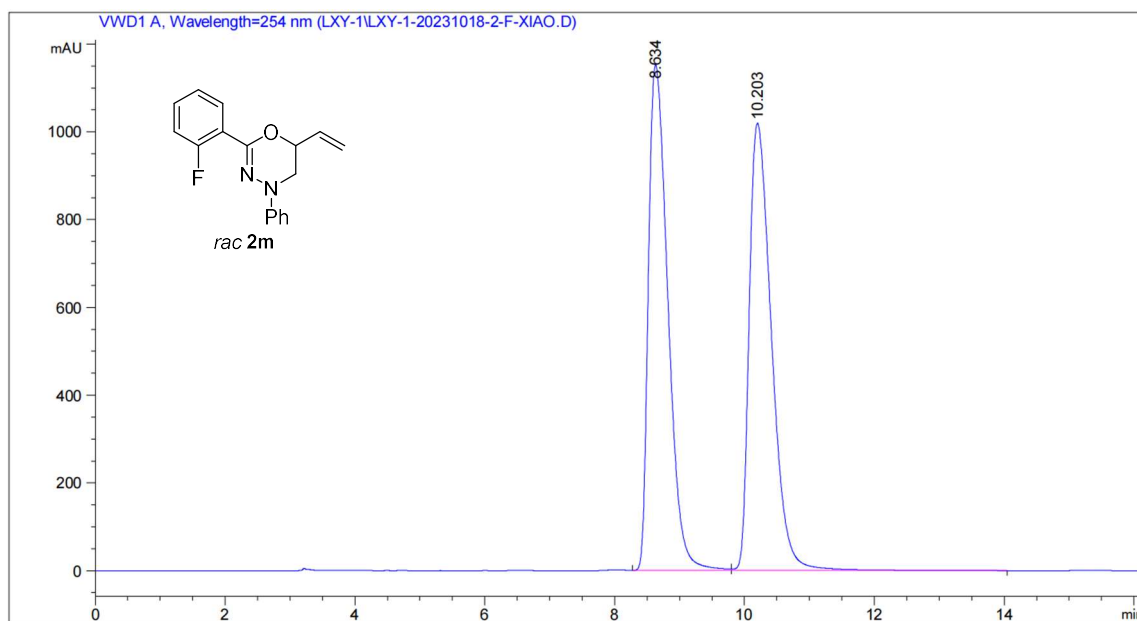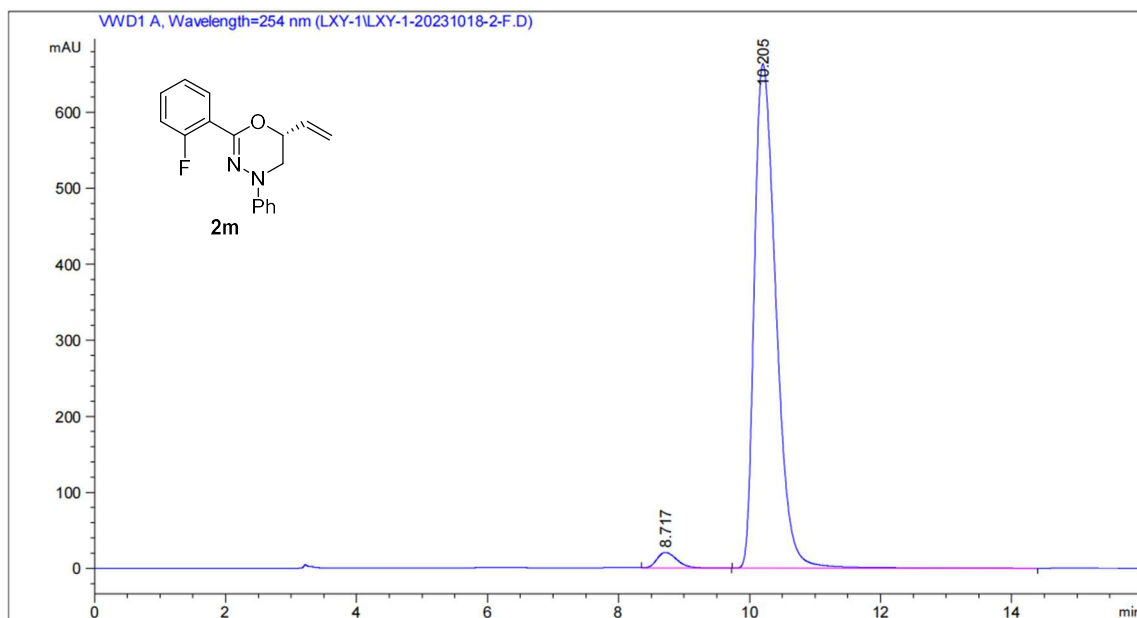

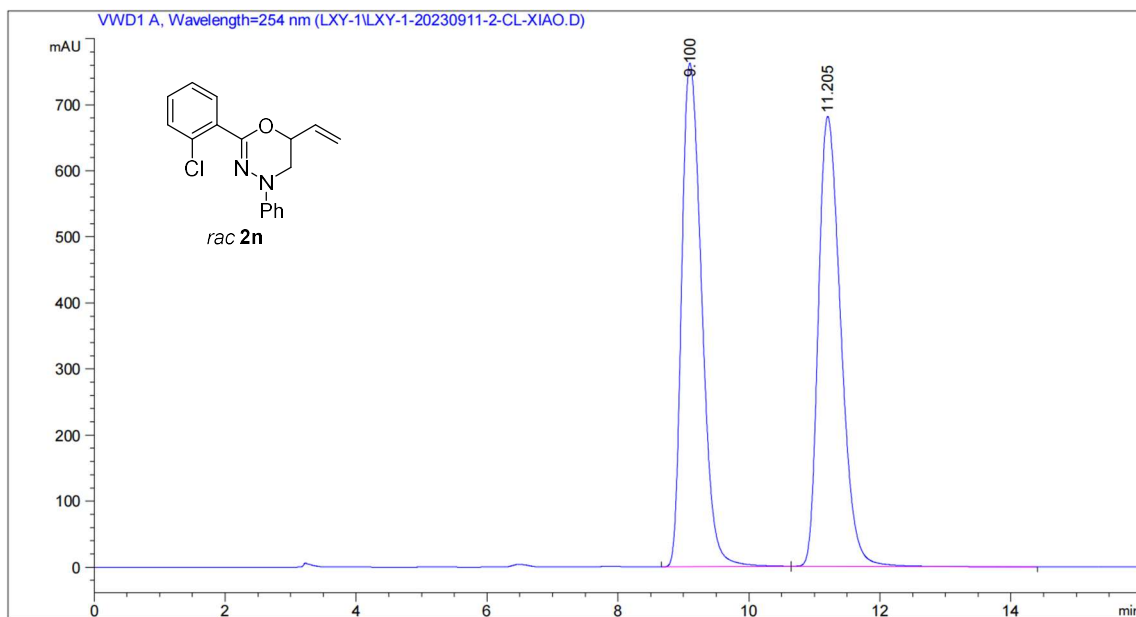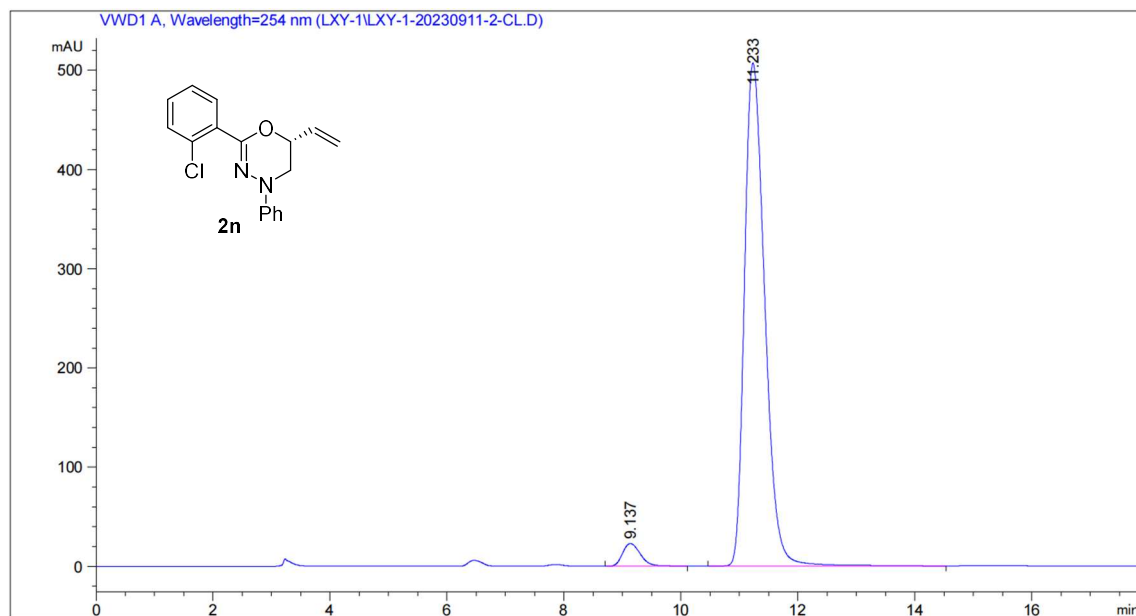

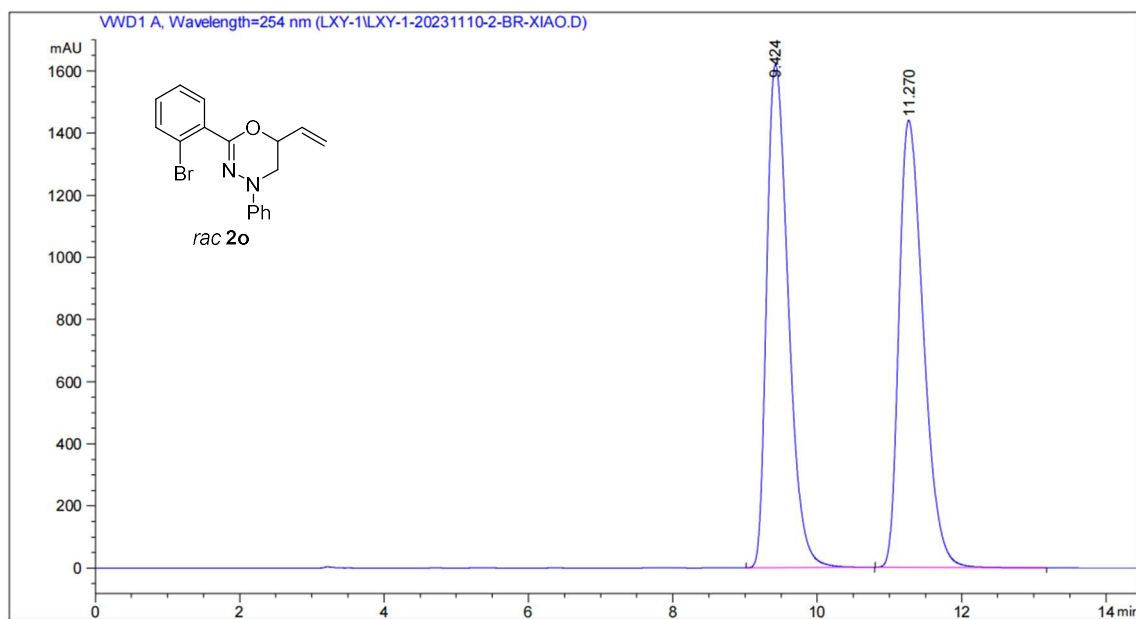

| Peak | Processed channel | Retention time (min) | Peak area (m AU*s) | Peak height (m AU) | Peak area (%) |
|------|-------------------|----------------------|--------------------|--------------------|---------------|
| 1    | PDA 254 nm        | 9.424                | 3.36028e4          | 1620.06213         | 49.9528       |
| 2    | PDA 254 nm        | 11.270               | 3.36663e4          | 1438.41309         | 50.0472       |

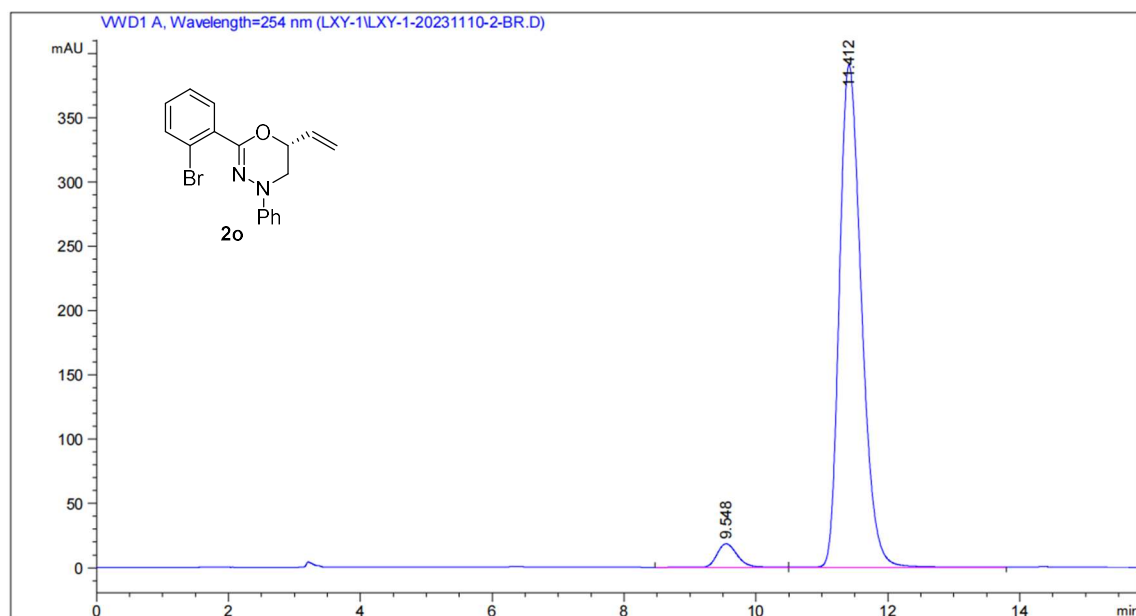

| Peak | Processed channel | Retention time (min) | Peak area (m AU*s) | Peak height (m AU) | Peak area (%) |
|------|-------------------|----------------------|--------------------|--------------------|---------------|
| 1    | PDA 254 nm        | 9.548                | 390.91885          | 18.28398           | 4.1342        |
| 2    | PDA 254 nm        | 11.412               | 9064.72363         | 390.72415          | 95.8658       |

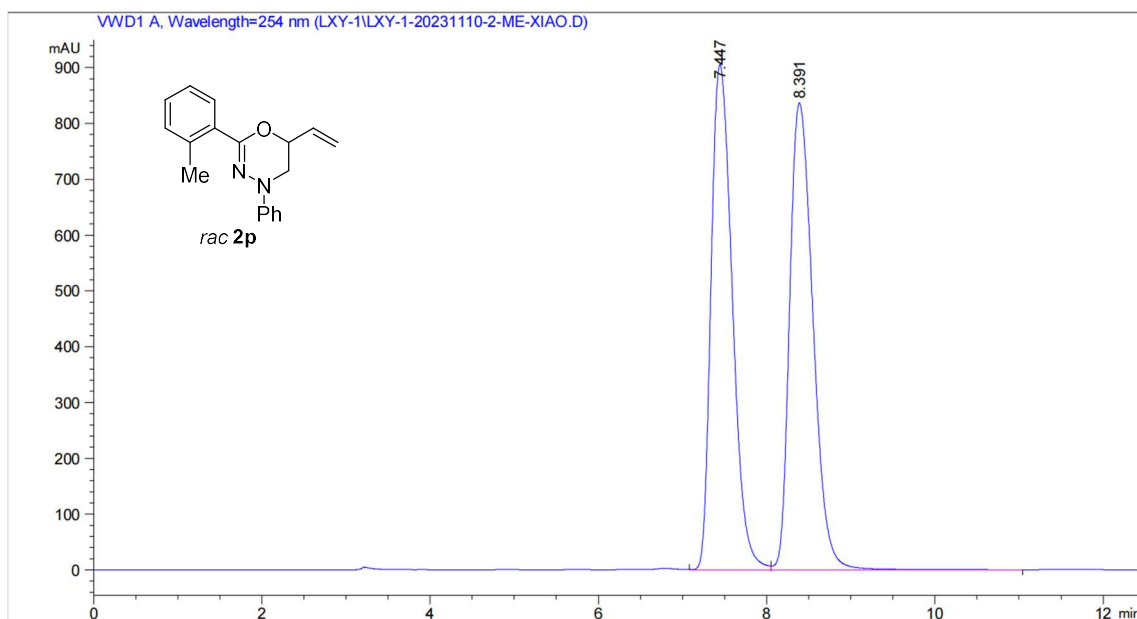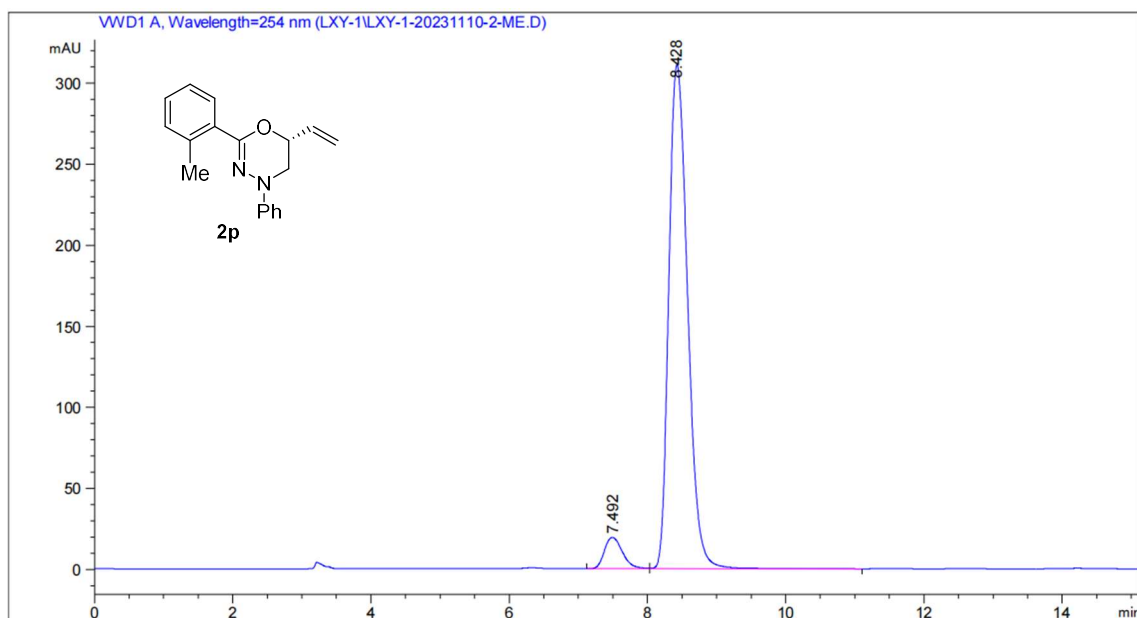

| Peak | Processed channel | Retention time (min) | Peak area (m AU*s) | Peak height (m AU) | Peak area (%) |
|------|-------------------|----------------------|--------------------|--------------------|---------------|
| 1    | PDA 254 nm        | 7.492                | 352.69107          | 19.37277           | 5.6812        |
| 2    | PDA 254 nm        | 8.428                | 5855.30957         | 310.72833          | 94.3188       |



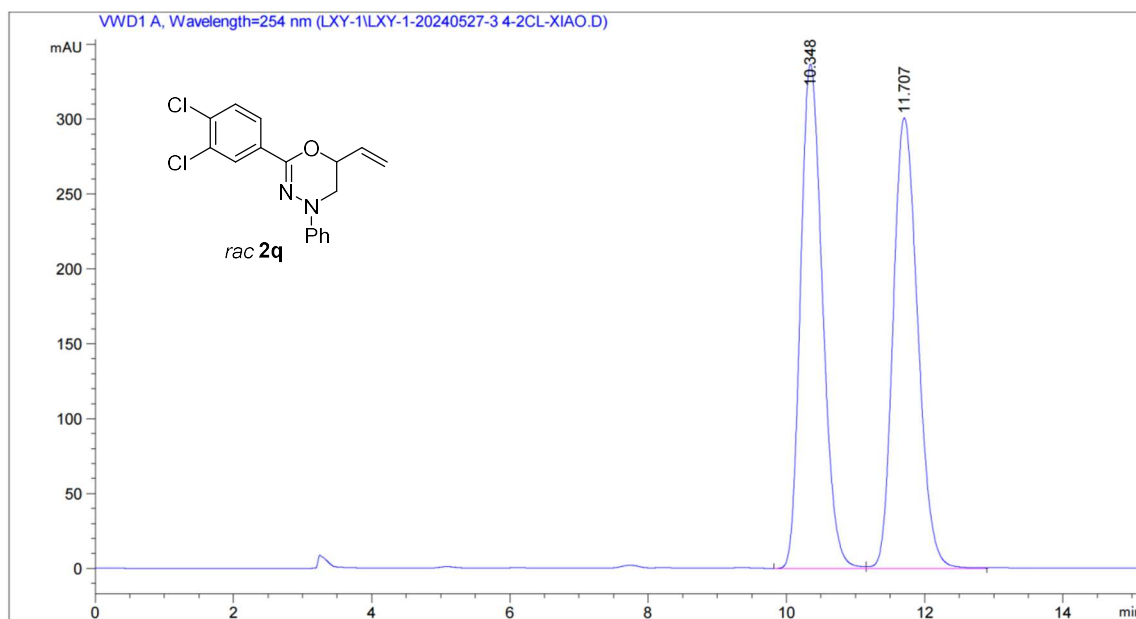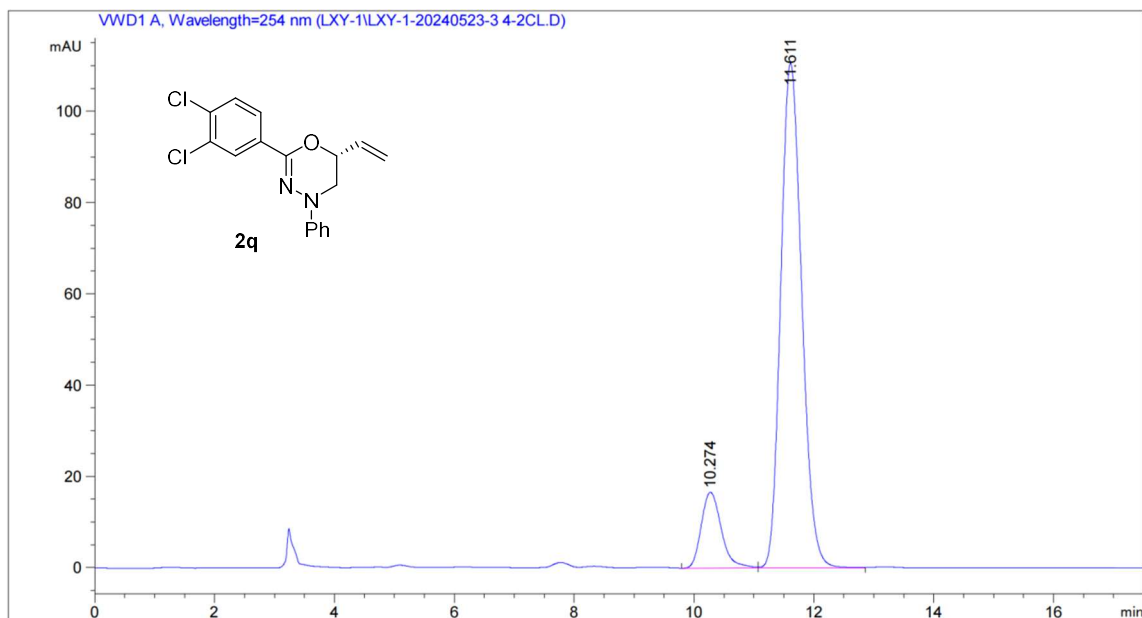

| Peak | Processed channel | Retention time (min) | Peak area (m AU*s) | Peak height (m AU) | Peak area (%) |
|------|-------------------|----------------------|--------------------|--------------------|---------------|
| 1    | PDA 254 nm        | 10.274               | 387.62274          | 16.63267           | 12.5782       |
| 2    | PDA 254 nm        | 11.611               | 2694.07861         | 110.66516          | 87.4218       |

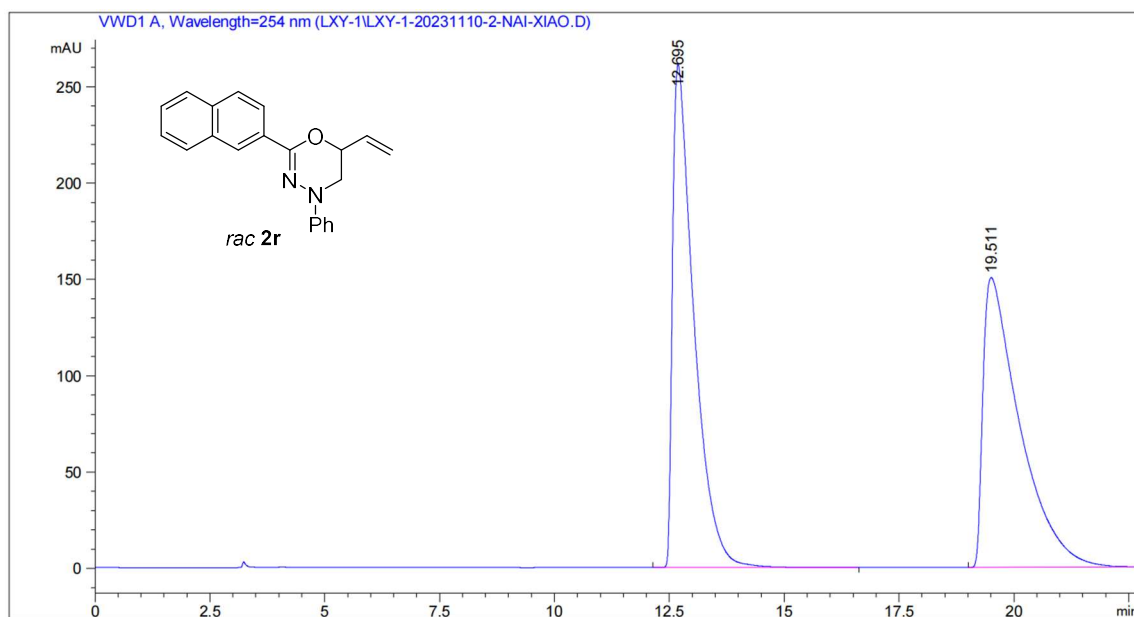

| Peak | Processed channel | Retention time (min) | Peak area (m AU*s) | Peak height (m AU) | Peak area (%) |
|------|-------------------|----------------------|--------------------|--------------------|---------------|
| 1    | PDA 254 nm        | 12.695               | 8435.94629         | 260.84421          | 50.1843       |
| 2    | PDA 254 nm        | 19.511               | 8373.97656         | 150.48225          | 49.8157       |

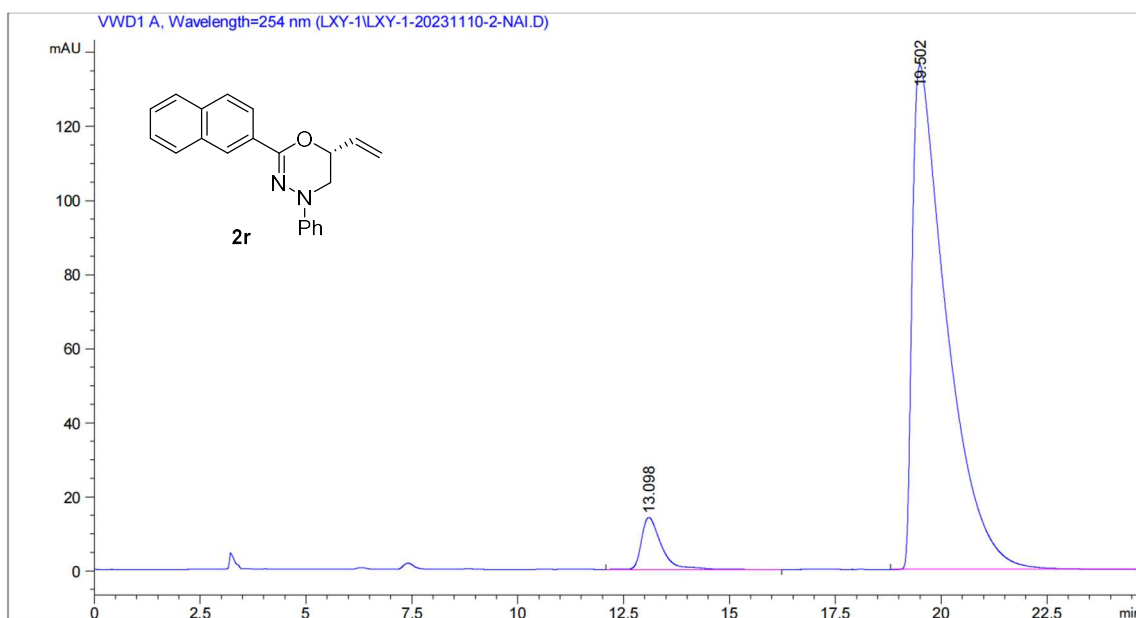

| Peak | Processed channel | Retention time (min) | Peak area (m AU*s) | Peak height (m AU) | Peak area (%) |
|------|-------------------|----------------------|--------------------|--------------------|---------------|
| 1    | PDA 254 nm        | 13.098               | 453.17133          | 14.05922           | 5.5786        |
| 2    | PDA 254 nm        | 19.502               | 7670.21338         | 136.24324          | 94.4214       |

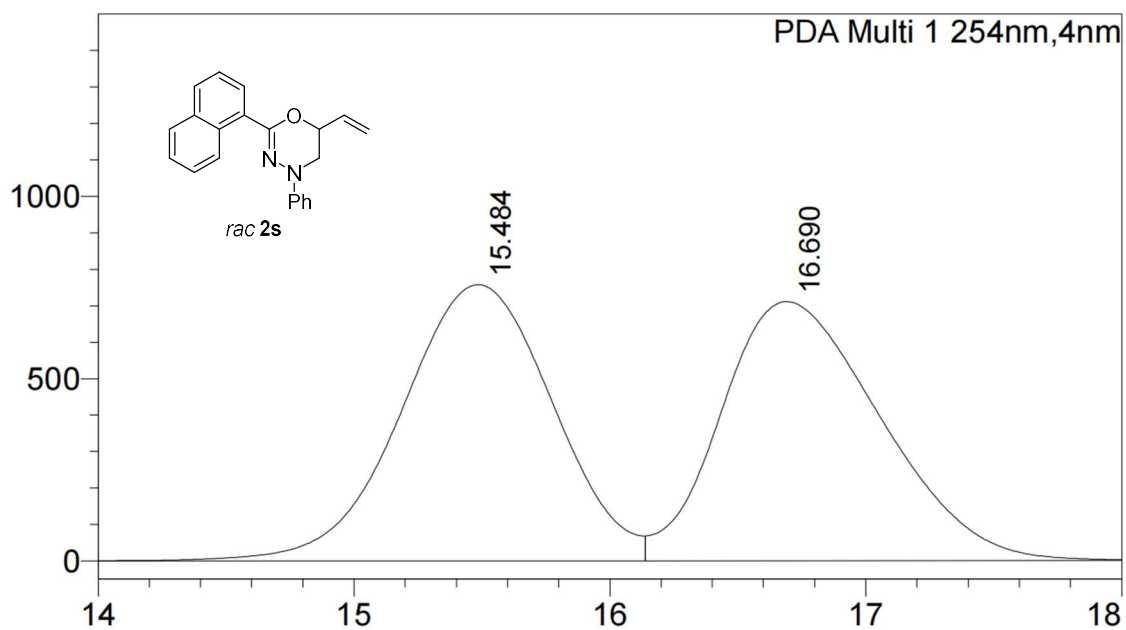

| Peak | Processed channel | Retention time (min) | Peak area (m AU*s) | Peak area (%) |
|------|-------------------|----------------------|--------------------|---------------|
| 1    | PDA 254 nm        | 15.484               | 51.98585e4         | 50.291        |
| 2    | PDA 254 nm        | 16.690               | 51.383265e4        | 49.709        |

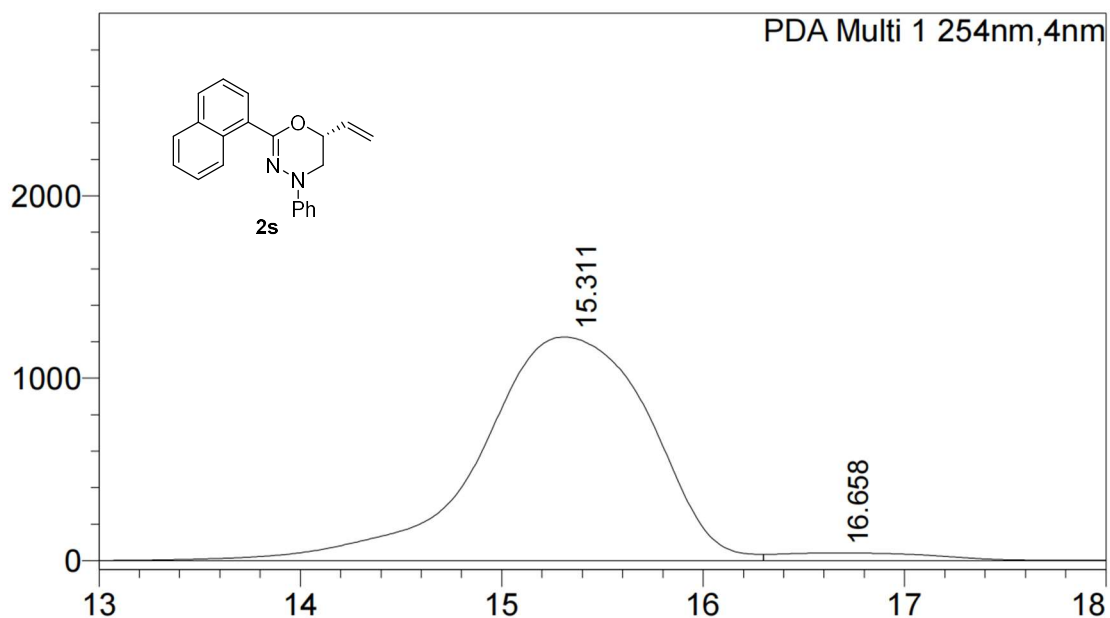

| Peak | Processed channel | Retention time (min) | Peak area (m AU*s) | Peak area (%) |
|------|-------------------|----------------------|--------------------|---------------|
| 1    | PDA 254 nm        | 15.311               | 120.32799e4        | 96.865        |
| 2    | PDA 254 nm        | 16.658               | 3.8938483e4        | 3.135         |

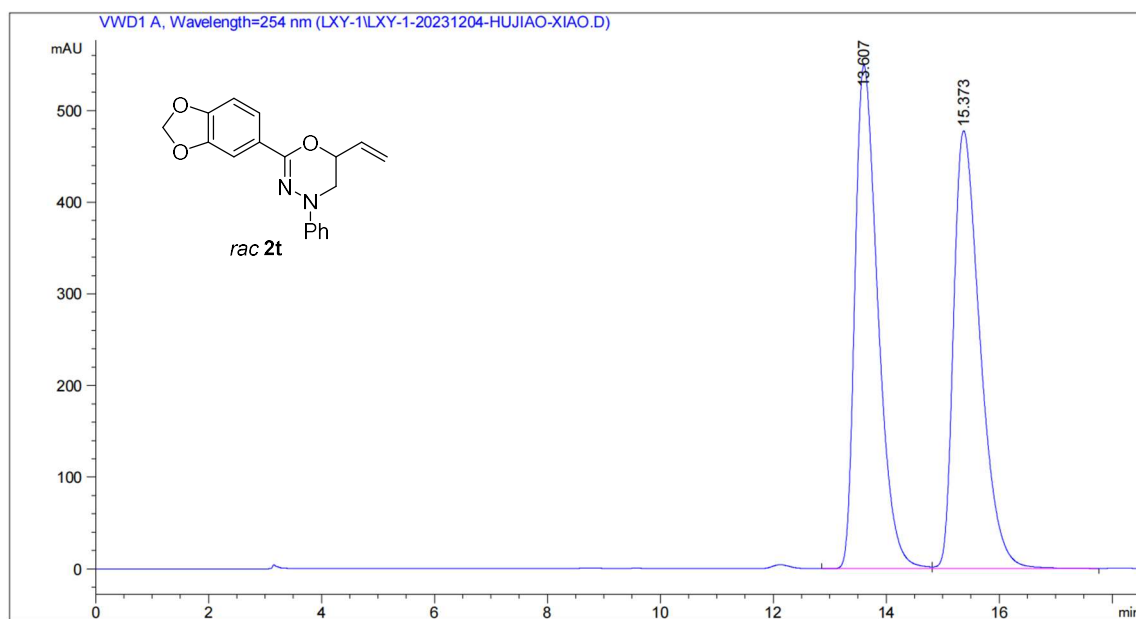

| Peak | Processed channel | Retention time (min) | Peak area (m AU*s) | Peak height (m AU) | Peak area (%) |
|------|-------------------|----------------------|--------------------|--------------------|---------------|
| 1    | PDA 254 nm        | 13.607               | 1.54510e4          | 549.31787          | 49.9152       |
| 2    | PDA 254 nm        | 15.373               | 1.55035e4          | 477.48062          | 50.0848       |

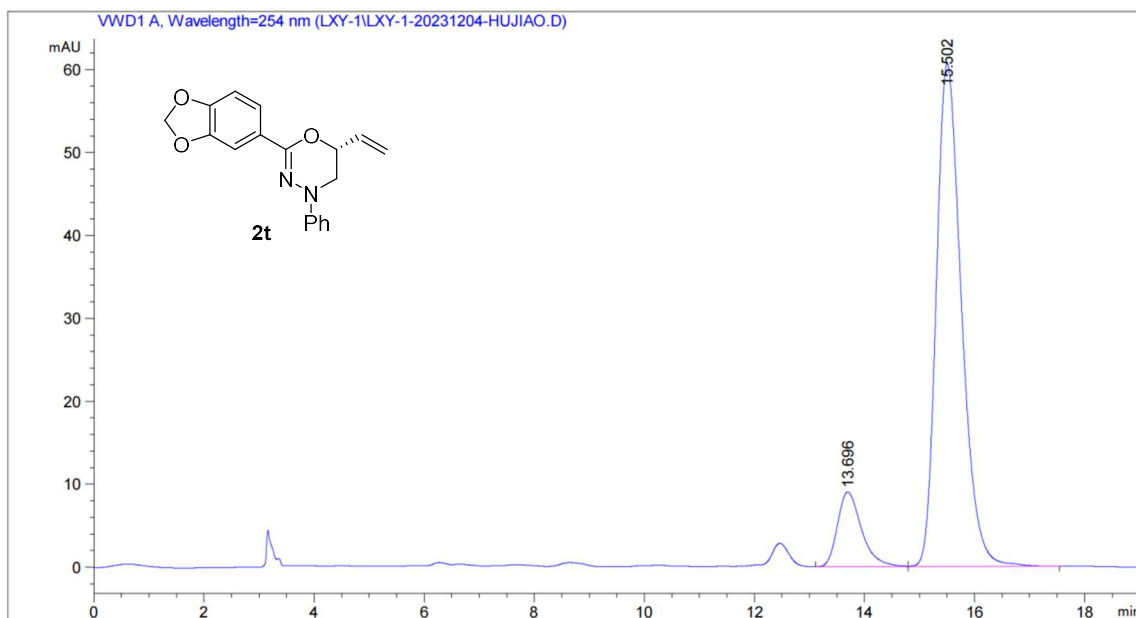

| Peak | Processed channel | Retention time (min) | Peak area (m AU*s) | Peak height (m AU) | Peak area (%) |
|------|-------------------|----------------------|--------------------|--------------------|---------------|
| 1    | PDA 254 nm        | 13.696               | 274.33865          | 9.01824            | 12.5148       |
| 2    | PDA 254 nm        | 15.502               | 1917.78259         | 60.62328           | 87.4852       |

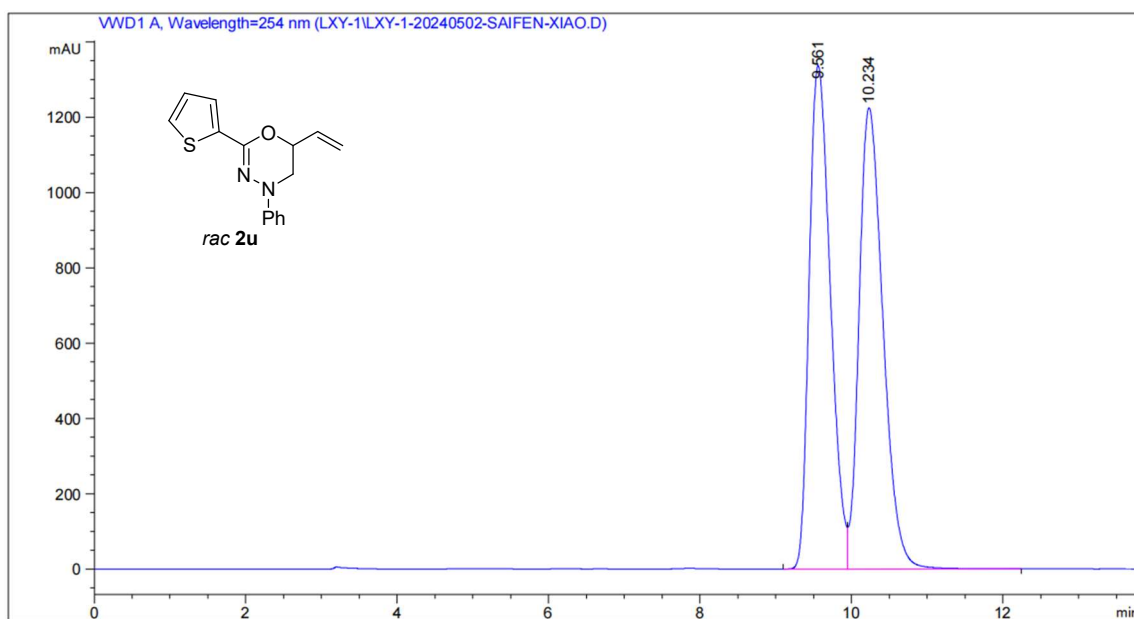

| Peak | Processed channel | Retention time (min) | Peak area (m AU*s) | Peak height (m AU) | Peak area (%) |
|------|-------------------|----------------------|--------------------|--------------------|---------------|
| 1    | PDA 254 nm        | 9.561                | 2.59236e4          | 1335.97803         | 49.0598       |
| 2    | PDA 254 nm        | 10.234               | 2.69172e4          | 1224.49683         | 50.9402       |

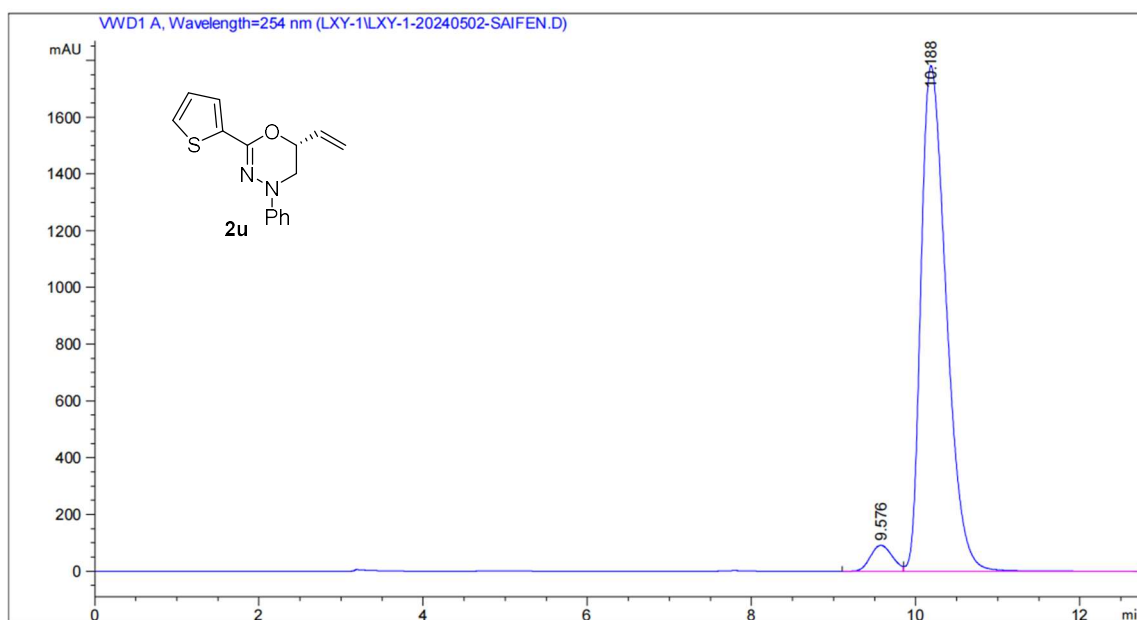

| Peak | Processed channel | Retention time (min) | Peak area (m AU*s) | Peak height (m AU) | Peak area (%) |
|------|-------------------|----------------------|--------------------|--------------------|---------------|
| 1    | PDA 254 nm        | 9.576                | 1685.50574         | 91.39238           | 4.2376        |
| 2    | PDA 254 nm        | 10.188               | 3.80895e4          | 1779.38586         | 95.7624       |

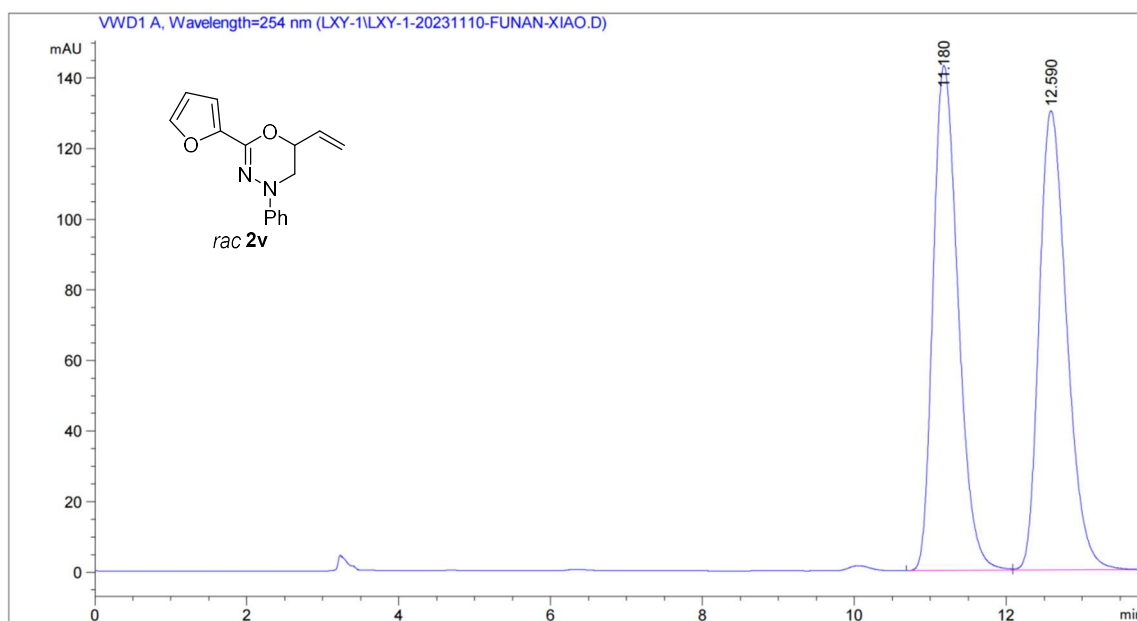

| Peak | Processed channel | Retention time (min) | Peak area (m AU*s) | Peak height (m AU) | Peak area (%) |
|------|-------------------|----------------------|--------------------|--------------------|---------------|
| 1    | PDA 254 nm        | 11.180               | 3267.55103         | 142.98737          | 49.9103       |
| 2    | PDA 254 nm        | 12.590               | 3279.29419         | 130.03745          | 50.0897       |

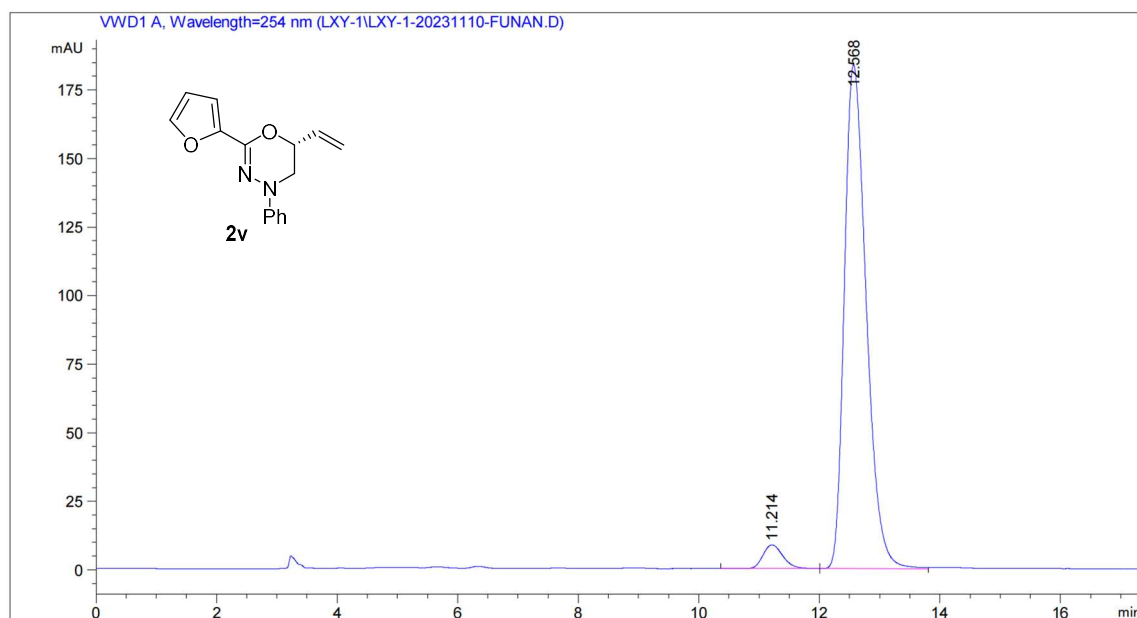

| Peak | Processed channel | Retention time (min) | Peak area (m AU*s) | Peak height (m AU) | Peak area (%) |
|------|-------------------|----------------------|--------------------|--------------------|---------------|
| 1    | PDA 254 nm        | 11.214               | 200.44565          | 8.67041            | 4.1608        |
| 2    | PDA 254 nm        | 12.568               | 4616.99756         | 183.66676          | 95.8392       |

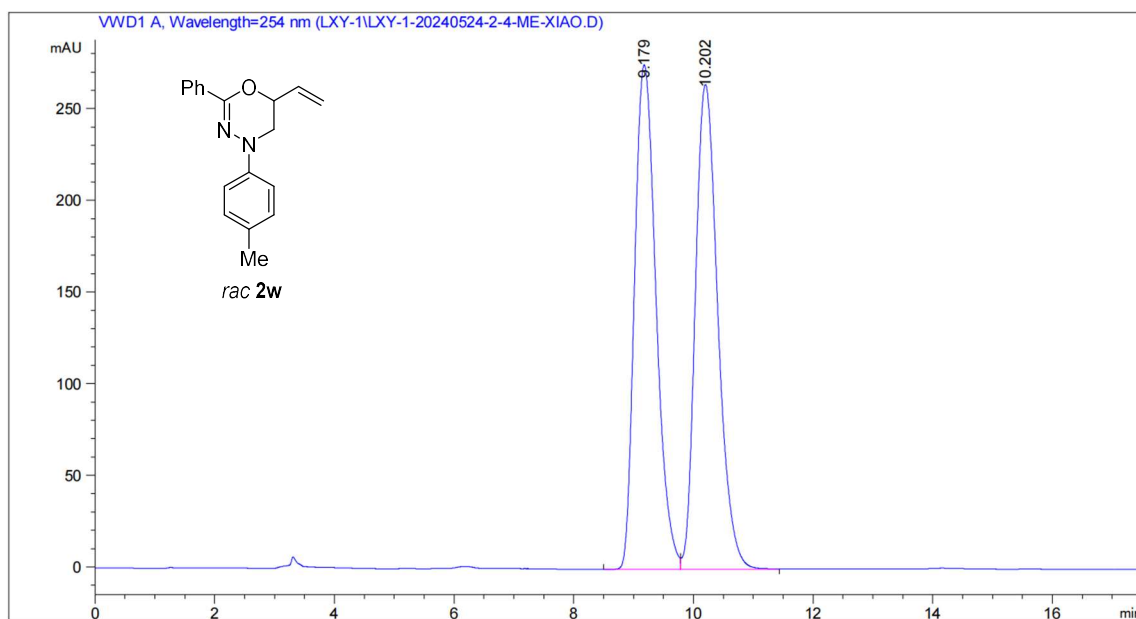

| Peak | Processed channel | Retention time (min) | Peak area (m AU*s) | Peak height (m AU) | Peak area (%) |
|------|-------------------|----------------------|--------------------|--------------------|---------------|
| 1    | PDA 254 nm        | 9.179                | 6829.65918         | 275.14215          | 49.7925       |
| 2    | PDA 254 nm        | 10.202               | 6886.58545         | 264.34167          | 50.2075       |

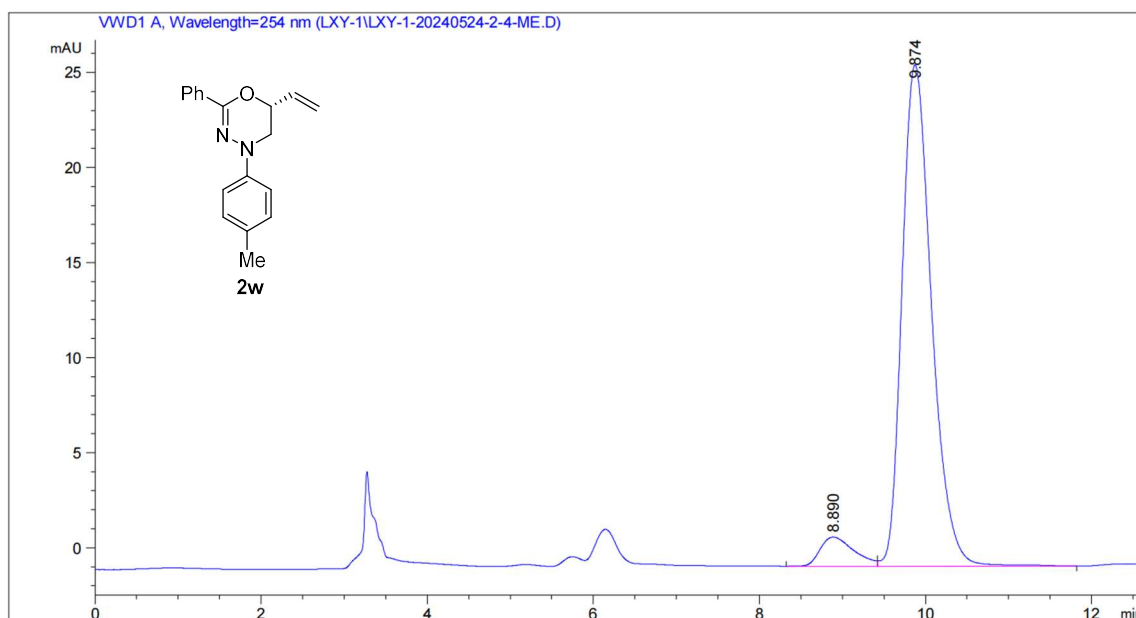

| Peak | Processed channel | Retention time (min) | Peak area (m AU*s) | Peak height (m AU) | Peak area (%) |
|------|-------------------|----------------------|--------------------|--------------------|---------------|
| 1    | PDA 254 nm        | 8.890                | 43.44970           | 1.53697            | 6.2648        |
| 2    | PDA 254 nm        | 9.874                | 650.10718          | 26.36923           | 93.7352       |

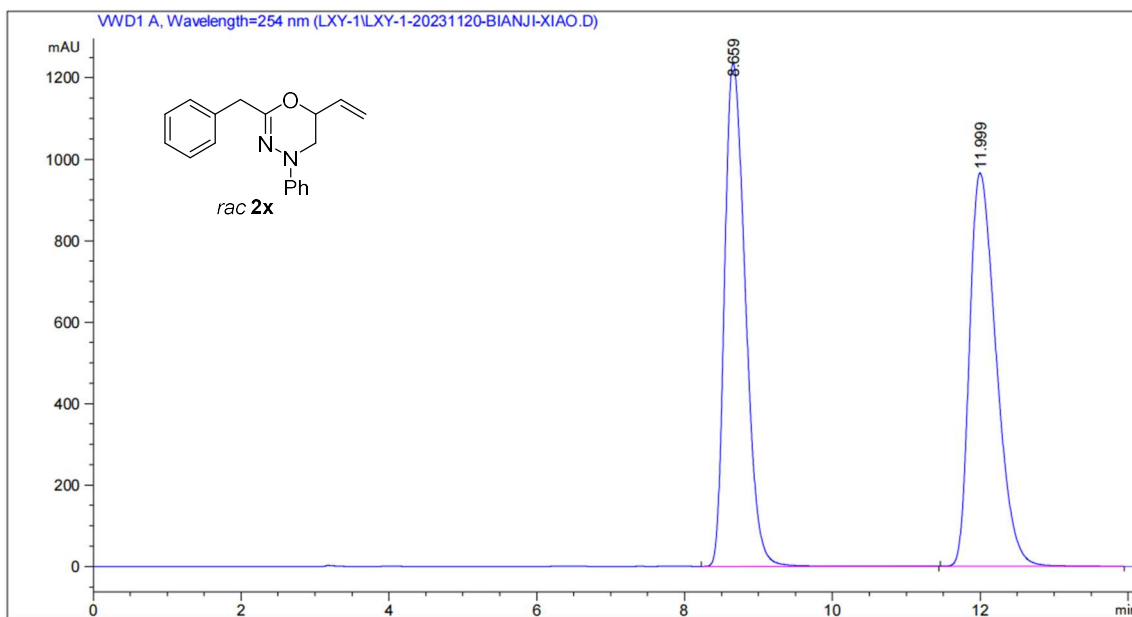

| Peak | Processed channel | Retention time (min) | Peak area (m AU*s) | Peak height (m AU) | Peak area (%) |
|------|-------------------|----------------------|--------------------|--------------------|---------------|
| 1    | PDA 254 nm        | 8.659                | 2.40789e4          | 1234.37024         | 49.9331       |
| 2    | PDA 254 nm        | 11.999               | 2.41434e4          | 965.33820          | 50.0669       |

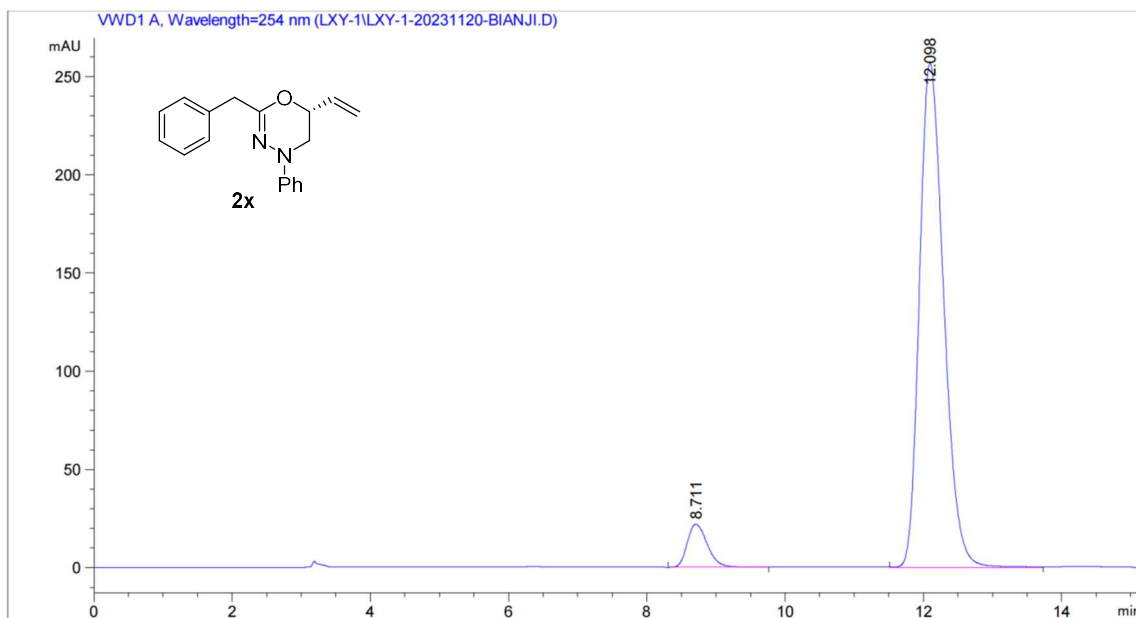

| Peak | Processed channel | Retention time (min) | Peak area (m AU*s) | Peak height (m AU) | Peak area (%) |
|------|-------------------|----------------------|--------------------|--------------------|---------------|
| 1    | PDA 254 nm        | 8.711                | 443.25421          | 21.94311           | 6.6360        |
| 2    | PDA 254 nm        | 12.098               | 6236.26514         | 256.69135          | 93.3640       |



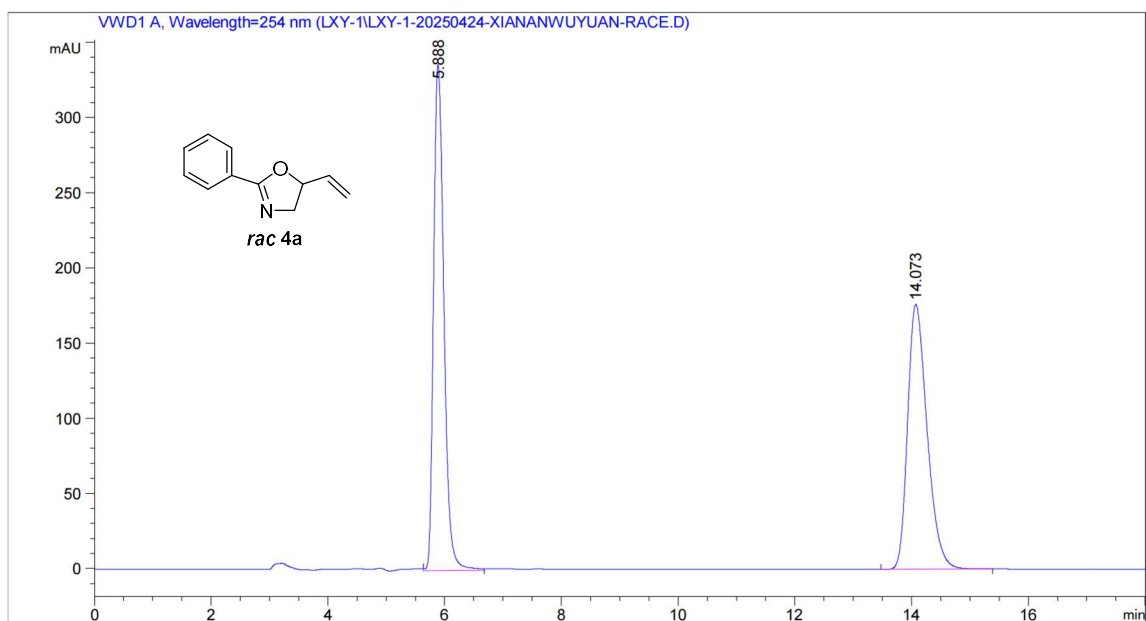

| Peak | Processed channel | Retention time (min) | Peak area (m AU*s) | Peak height (m AU) | Peak area (%) |
|------|-------------------|----------------------|--------------------|--------------------|---------------|
| 1    | PDA 254 nm        | 5.888                | 4125.52588         | 336.19339          | 50.2732       |
| 2    | PDA 254 nm        | 14.073               | 4080.68774         | 176.01389          | 49.7268       |

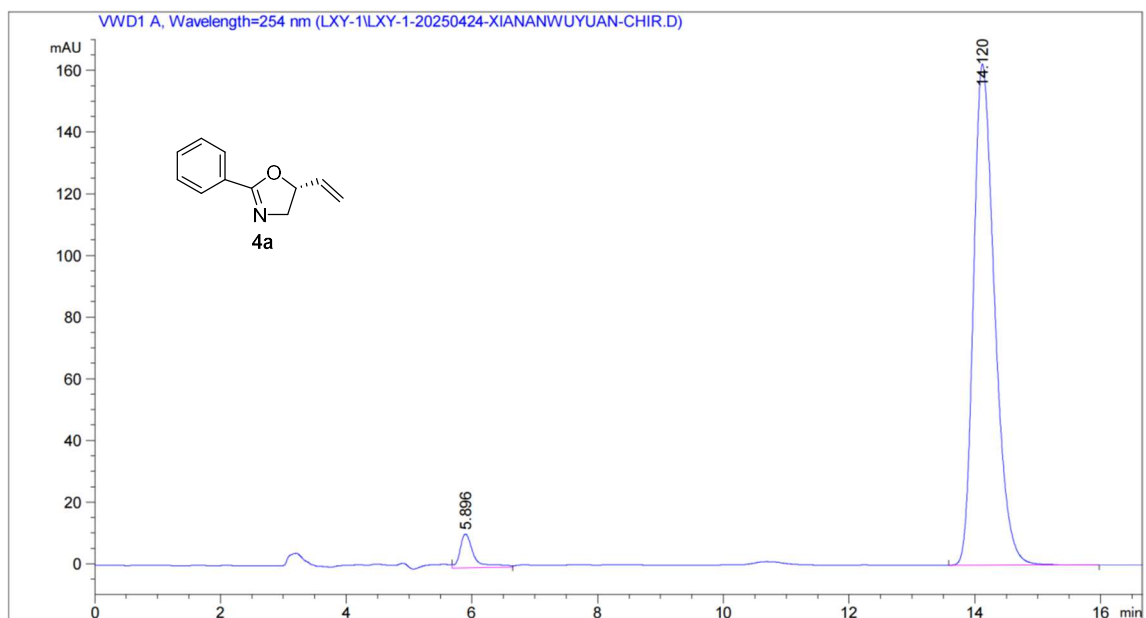

| Peak | Processed channel | Retention time (min) | Peak area (m AU*s) | Peak height (m AU) | Peak area (%) |
|------|-------------------|----------------------|--------------------|--------------------|---------------|
| 1    | PDA 254 nm        | 5.896                | 175.14236          | 11.08113           | 4.4211        |
| 2    | PDA 254 nm        | 14.120               | 3786.38989         | 162.44640          | 95.5789       |

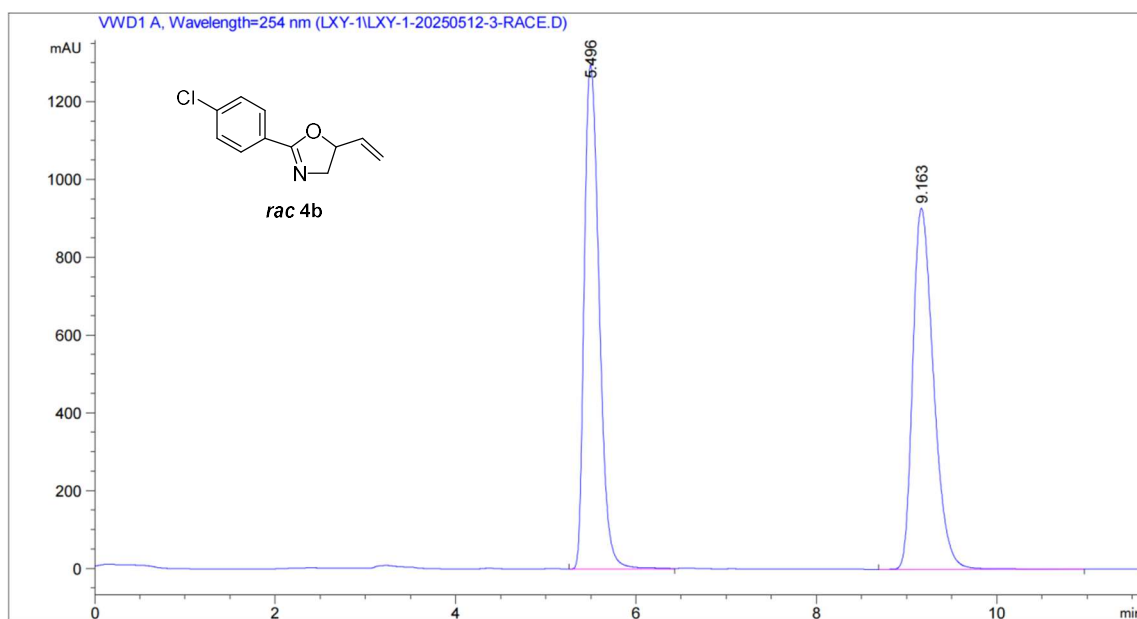

| Peak | Processed channel | Retention time (min) | Peak area (m AU*s) | Peak height (m AU) | Peak area (%) |
|------|-------------------|----------------------|--------------------|--------------------|---------------|
| 1    | PDA 254 nm        | 5.496                | 1.49185e4          | 1295.70142         | 50.0619       |
| 2    | PDA 254 nm        | 9.163                | 1.48817e4          | 928.4371           | 49.9381       |

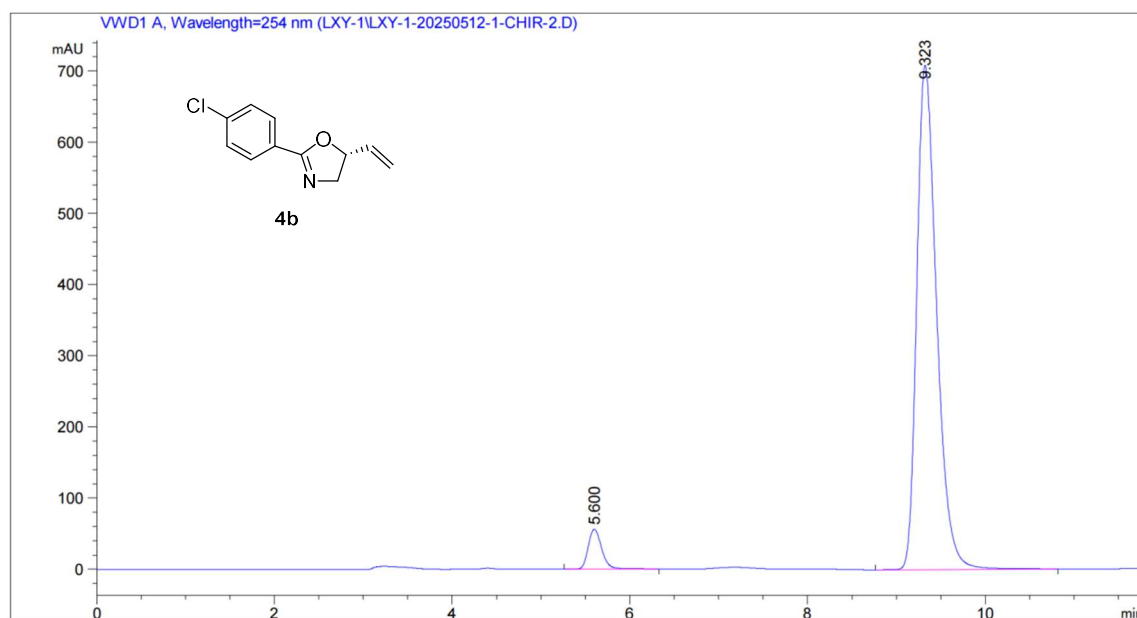

| Peak | Processed channel | Retention time (min) | Peak area (m AU*s) | Peak height (m AU) | Peak area (%) |
|------|-------------------|----------------------|--------------------|--------------------|---------------|
| 1    | PDA 254 nm        | 5.600                | 598.02081          | 56.08037           | 5.1663        |
| 2    | PDA 254 nm        | 9.323                | 1.09773e4          | 708.38879          | 94.8337       |

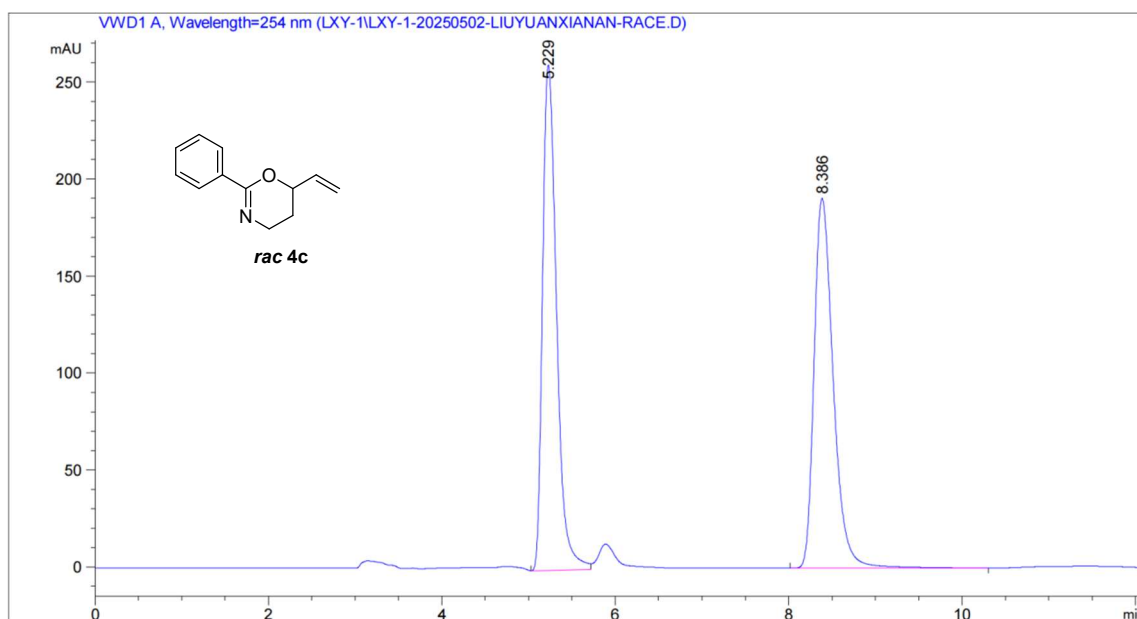

| Peak | Processed channel | Retention time (min) | Peak area (m AU*s) | Peak height (m AU) | Peak area (%) |
|------|-------------------|----------------------|--------------------|--------------------|---------------|
| 1    | PDA 254 nm        | 5.229                | 2916.52612         | 260.33728          | 49.9496       |
| 2    | PDA 254 nm        | 8.386                | 2922.40967         | 190.48338          | 50.0504       |

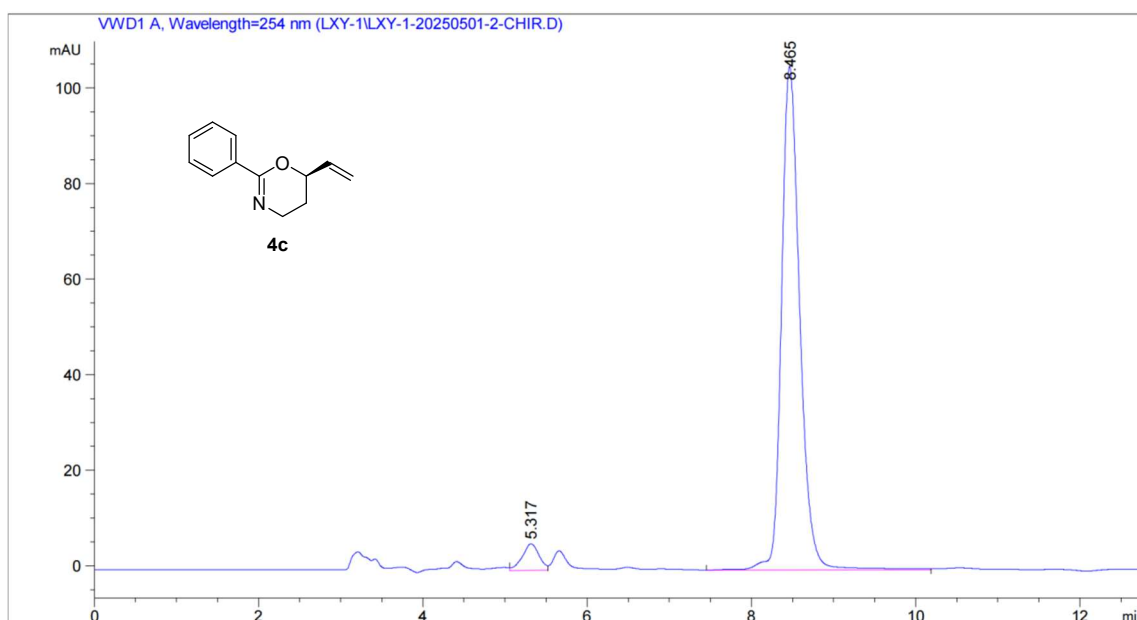

| Peak | Processed channel | Retention time (min) | Peak area (m AU*s) | Peak height (m AU) | Peak area (%) |
|------|-------------------|----------------------|--------------------|--------------------|---------------|
| 1    | PDA 254 nm        | 5.317                | 80.11609           | 5.59061            | 4.6668        |
| 2    | PDA 254 nm        | 8.465                | 1636.60779         | 105.32313          | 95.3332       |

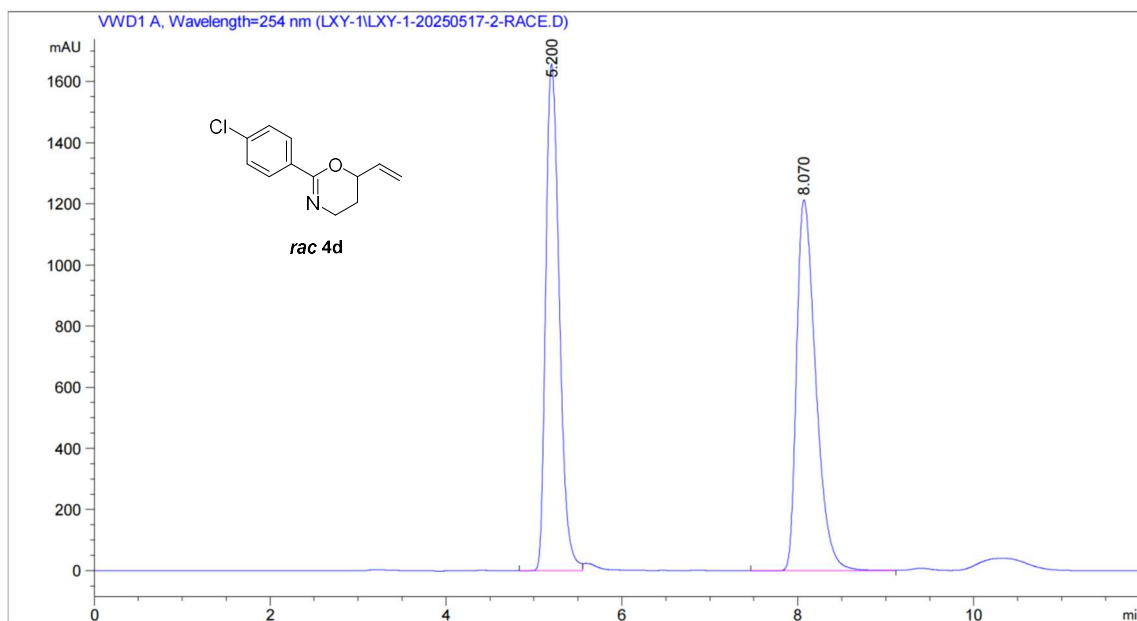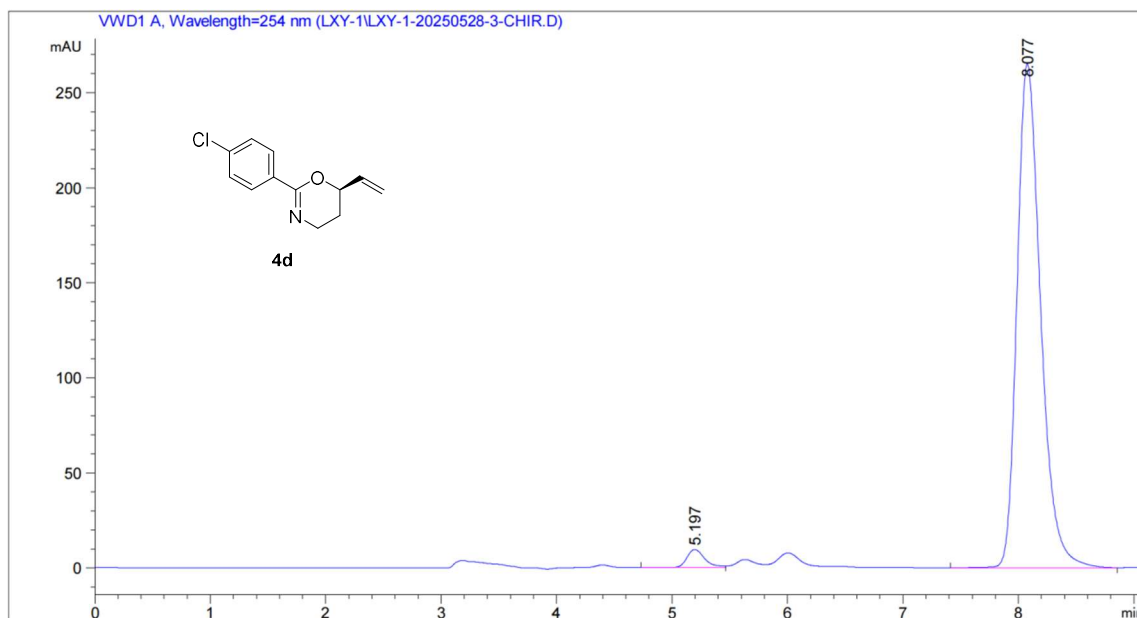

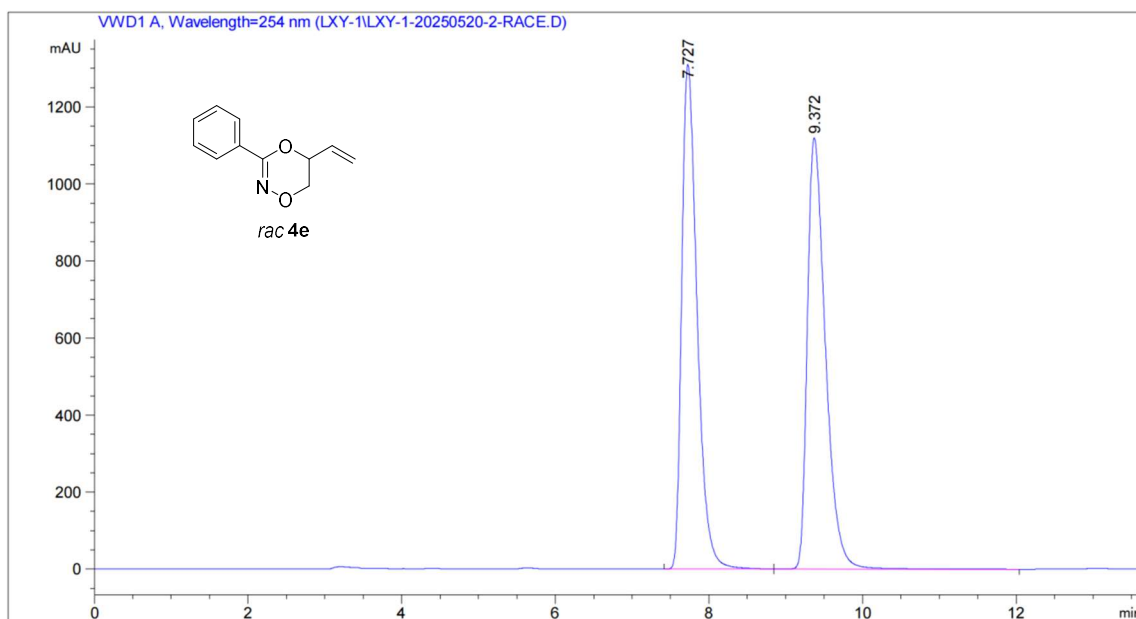

| Peak | Processed channel | Retention time (min) | Peak area (m AU*s) | Peak height (m AU) | Peak area (%) |
|------|-------------------|----------------------|--------------------|--------------------|---------------|
| 1    | PDA 254 nm        | 7.727                | 1.81730e4          | 1309.41895         | 49.8411       |
| 2    | PDA 254 nm        | 9.372                | 1.82889e4          | 1118.37268         | 50.1589       |

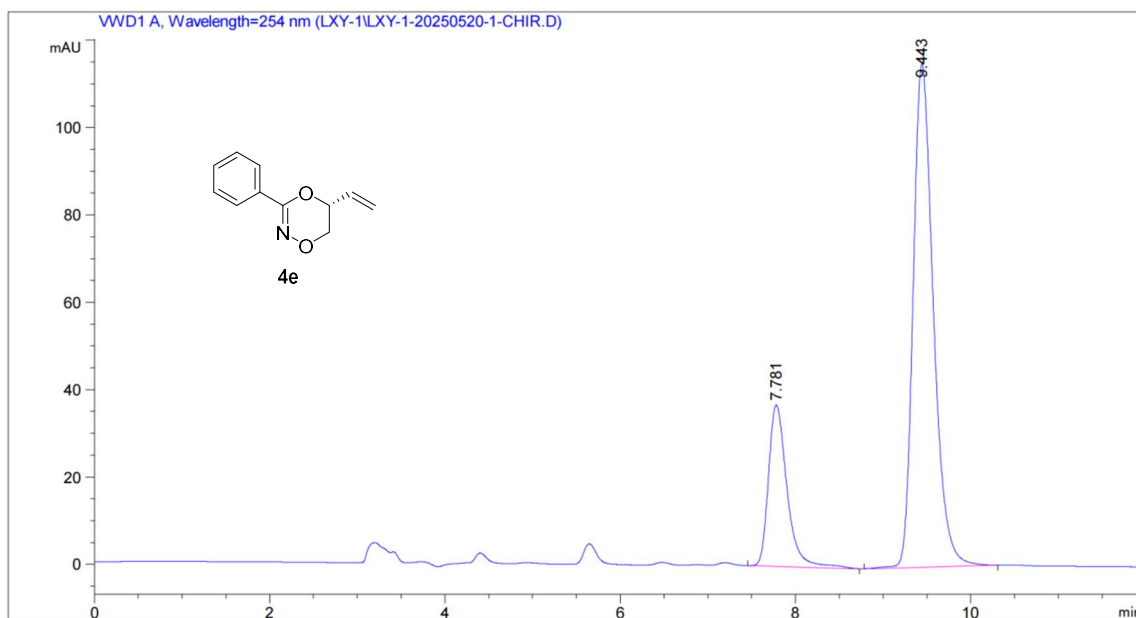

| Peak | Processed channel | Retention time (min) | Peak area (m AU*s) | Peak height (m AU) | Peak area (%) |
|------|-------------------|----------------------|--------------------|--------------------|---------------|
| 1    | PDA 254 nm        | 7.781                | 544.44464          | 36.93044           | 22.8017       |
| 2    | PDA 254 nm        | 9.443                | 1843.29077         | 115.21226          | 77.1983       |

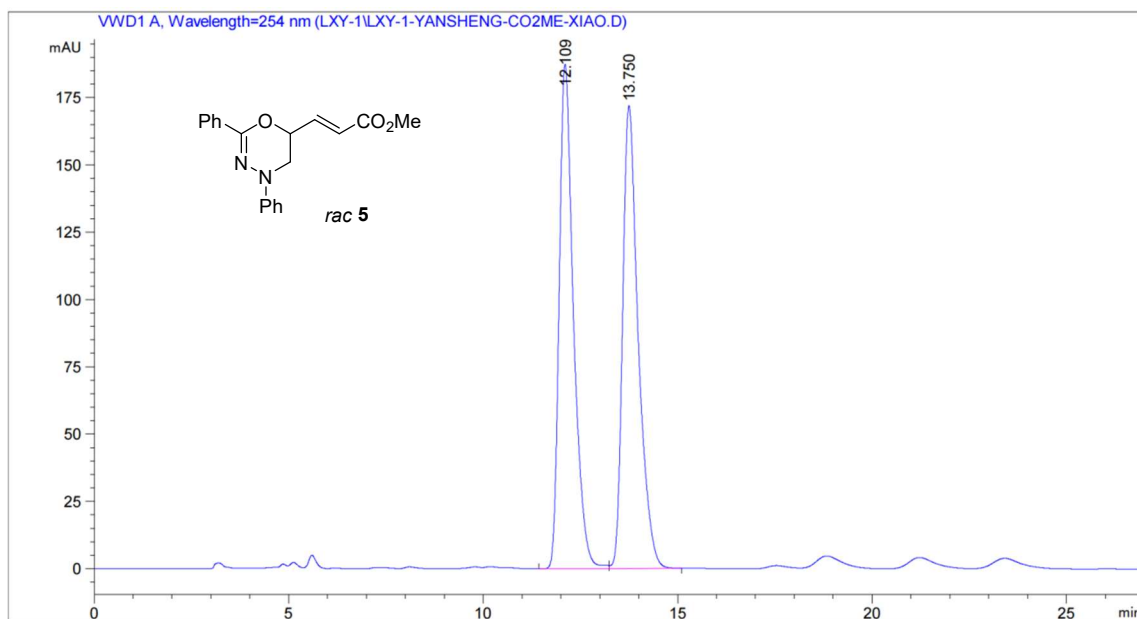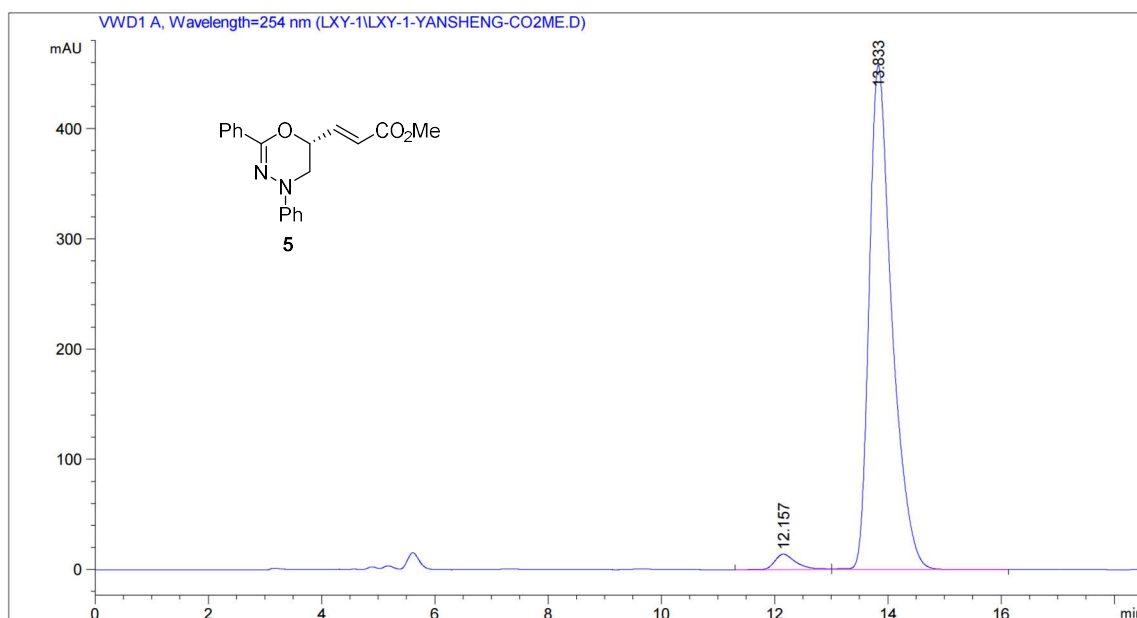

| Peak | Processed channel | Retention time (min) | Peak area (m AU*s) | Peak height (m AU) | Peak area (%) |
|------|-------------------|----------------------|--------------------|--------------------|---------------|
| 1    | PDA 254 nm        | 12.157               | 374.43576          | 14.11616           | 2.8444        |
| 2    | PDA 254 nm        | 13.833               | 1.27894e4          | 457.64883          | 97.1556       |

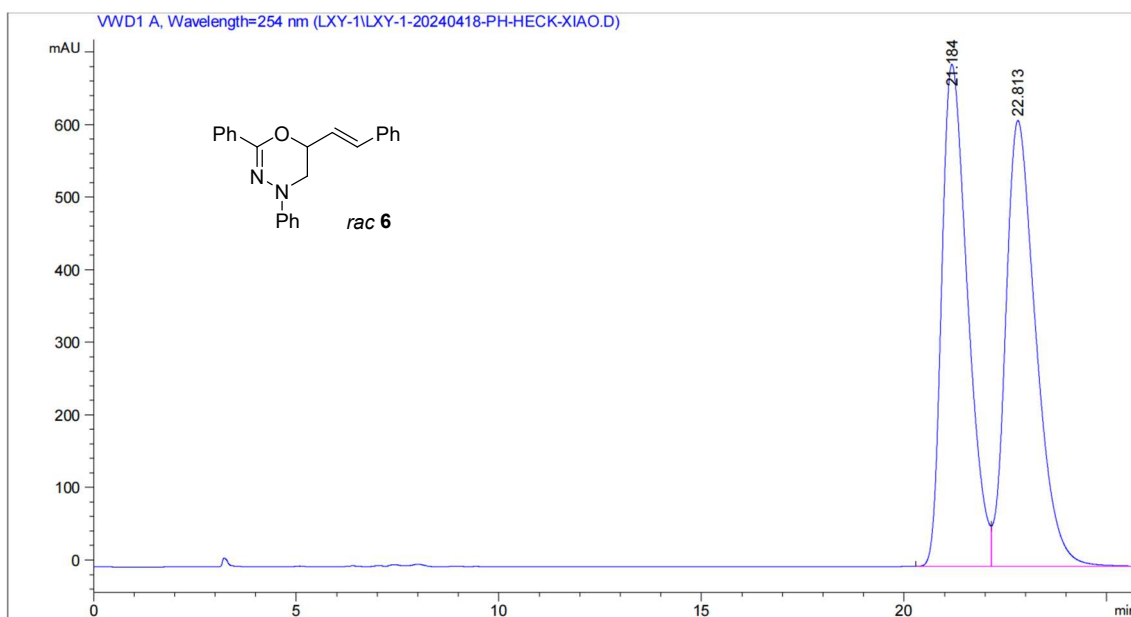

| Peak | Processed channel | Retention time (min) | Peak area (m AU*s) | Peak height (m AU) | Peak area (%) |
|------|-------------------|----------------------|--------------------|--------------------|---------------|
| 1    | PDA 254 nm        | 21.184               | 3.05890e4          | 691.50647          | 49.0853       |
| 2    | PDA 254 nm        | 22.813               | 3.17290e4          | 613.99219          | 50.9147       |

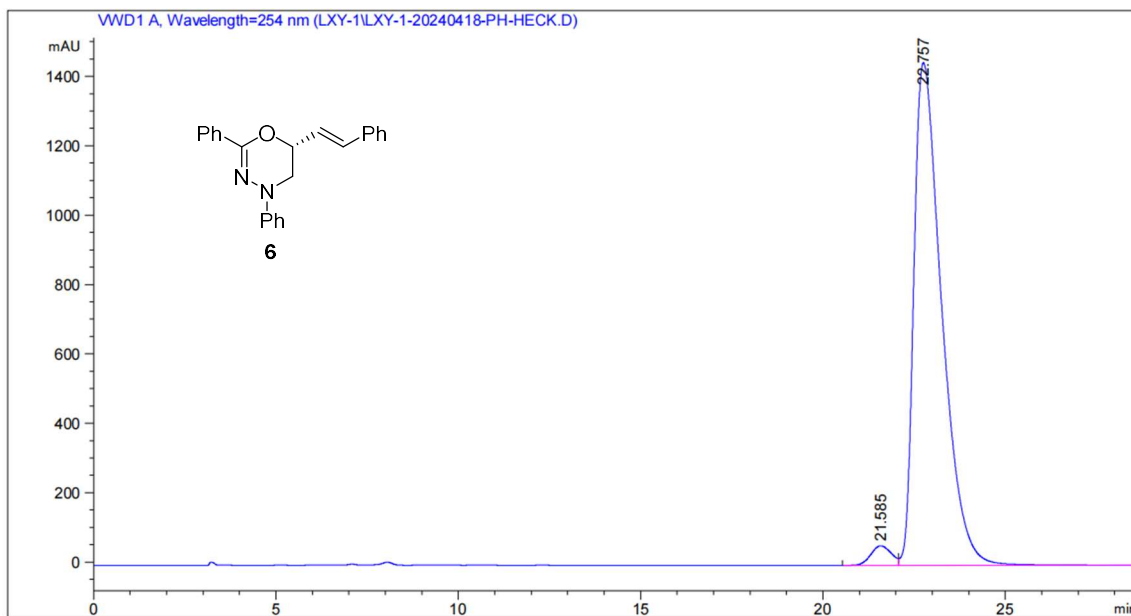

| Peak | Processed channel | Retention time (min) | Peak area (m AU*s) | Peak height (m AU) | Peak area (%) |
|------|-------------------|----------------------|--------------------|--------------------|---------------|
| 1    | PDA 254 nm        | 21.585               | 2188.78540         | 56.39798           | 2.7776        |
| 2    | PDA 254 nm        | 22.757               | 7.66125e4          | 1448.94678         | 97.2224       |

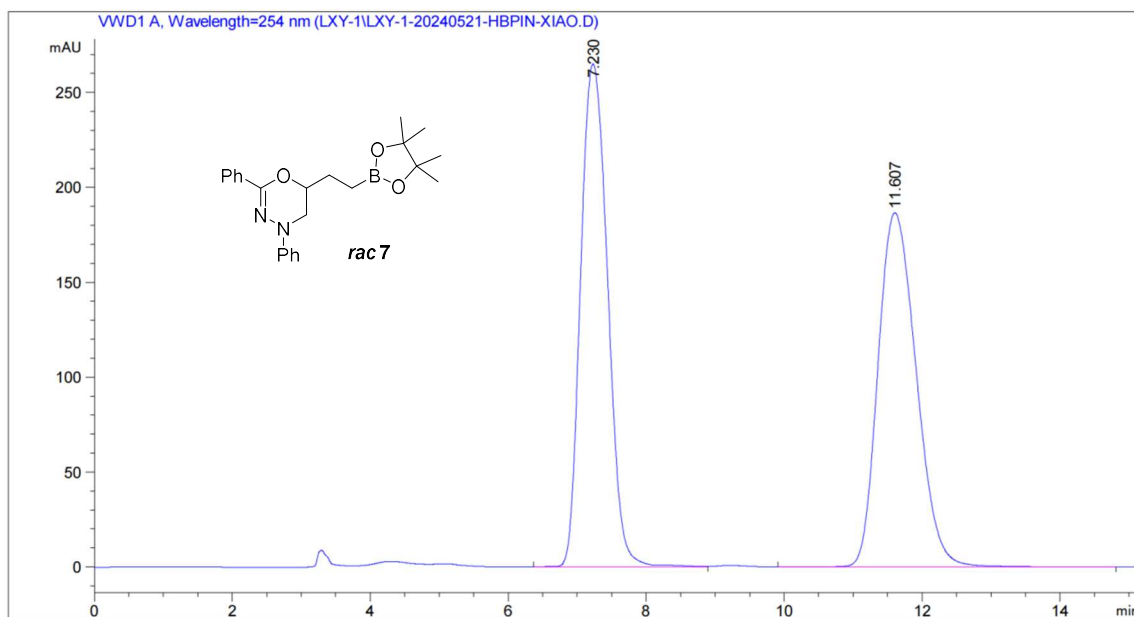

| Peak | Processed channel | Retention time (min) | Peak area (m AU*s) | Peak height (m AU) | Peak area (%) |
|------|-------------------|----------------------|--------------------|--------------------|---------------|
| 1    | PDA 254 nm        | 7.230                | 7192.04590         | 264.79297          | 50.1011       |
| 2    | PDA 254 nm        | 11.607               | 7163.01318         | 186.49080          | 49.8989       |

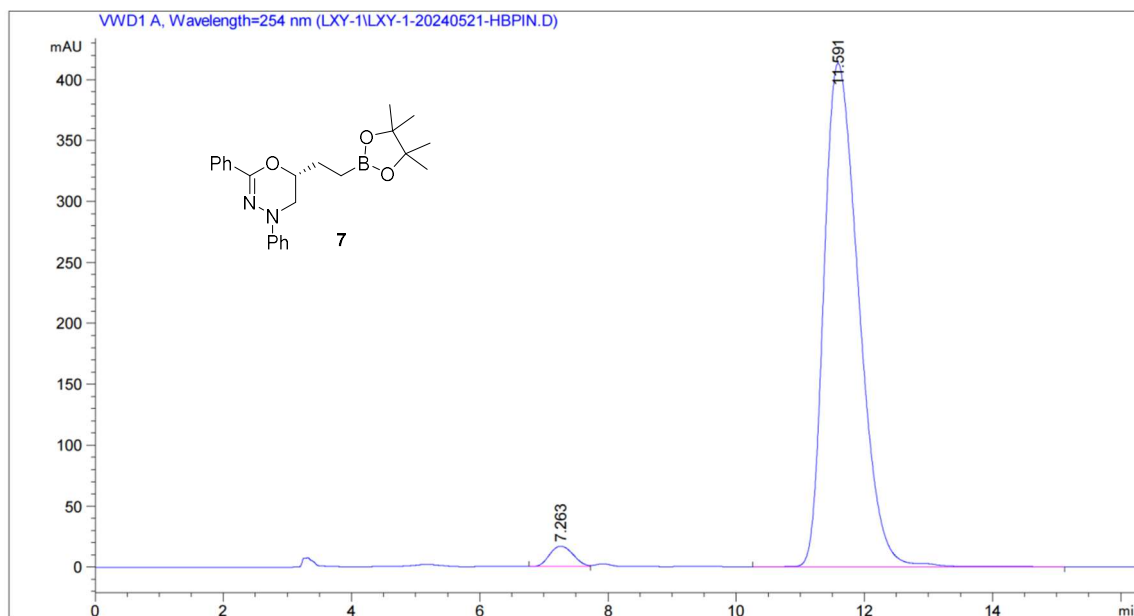

| Peak | Processed channel | Retention time (min) | Peak area (m AU*s) | Peak height (m AU) | Peak area (%) |
|------|-------------------|----------------------|--------------------|--------------------|---------------|
| 1    | PDA 254 nm        | 7.263                | 429.49326          | 16.72911           | 2.6992        |
| 2    | PDA 254 nm        | 11.591               | 1.54823e4          | 413.18597          | 97.3008       |
